# Supplementary material
Source: Research Square preprint supplement (doi:10.21203/rs.3.rs-9119261/v1)
Supplement: Supplementary file 1 [file 27f85313d9605b8ae6daa687.xlsx]

## Sheet: PLM
PLM group	weeks	PLM±	fetal movement	time in bed	8h over
study group	28	PLM+	24.94	423.37	✕
study group	28	PLM-	6.76	416.87	✕
study group	28	PLM+	1.75	464.98	✕
study group	28	PLM+	14.36	546.86	○
study group	28	PLM-	8.85	482.27	○
study group	28	PLM+	17.01	319.14	✕
study group	28	PLM+	12.02	521.38	○
study group	28	PLM-	28.17	369.3	✕
study group	28	PLM+	17.75	387.72	✕
study group	28	PLM+	22.58	402.83	✕
study group	28	PLM+	20.48	388.86	✕
study group	28	PLM+	8.19	384.02	✕
study group	28	PLM+	6.96	428.67	✕
study group	28	PLM+	33.35	351.95	✕
study group	28	PLM+	34.54	484.08	○
study group	28	PLM+	10.23	399.09	✕
study group	28	PLM+	12.83	412.01	✕
study group	28	PLM+	10.69	493.73	○
study group	28	PLM+	10.49	335.58	✕
study group	28	PLM+	18.49	376.7	✕
study group	28	PLM+	16.95	356.15	✕
study group	28	PLM+	9.35	430.4	✕
study group	28	PLM+	6.38	433.2	✕
study group	28	PLM+	37.09	409.29	✕
study group	28	PLM+	37.63	246.93	✕
study group	28	PLM+	11.86	351.28	✕
study group	28	PLM+	1.94	404.98	✕
study group	28	PLM-	8.97	323.45	✕
study group	28	PLM+	23.08	392.07	✕
study group	28	PLM+	16.39	524.73	○
study group	28	PLM-	23.17	329.93	✕
study group	28	PLM+	16.49	436.27	✕
study group	28	PLM+	17.74	361	✕
study group	28	PLM+	3.74	360.66	✕
study group	28	PLM+	26.02	461.18	✕
study group	28	PLM-	6.67	425.47	✕
study group	28	PLM+	8.26	458.24	✕
study group	28	PLM+	33.81	511.82	○
study group	28	PLM+	28.95	382.32	✕
study group	28	PLM-	13.99	440.18	✕
study group	28	PLM+	10.1	449.14	✕
study group	28	PLM+	8.32	459.03	✕
study group	28	PLM+	15.67	408.45	✕
study group	28	PLM+	10.03	474.5	✕
study group	28	PLM+	35.27	537.1	○
study group	28	PLM-	18.87	570.89	○
study group	28	PLM-	28.04	549.75	○
study group	28	PLM+	25.03	402.2	✕
study group	28	PLM-	16.99	428.19	✕
study group	28	PLM-	16.86	437.95	✕
study group	28	PLM+	8.23	455.55	✕
study group	28	PLM-	12.58	555.25	○
study group	28	PLM+	5.09	372.12	✕
study group	28	PLM+	24.64	403.02	✕
study group	28	PLM+	23.34	511.83	○
study group	28	PLM-	10.22	521.94	○
study group	28	PLM+	4.41	281.96	✕
study group	28	PLM+	9.02	515.05	○
study group	28	PLM+	14.32	388.71	✕
study group	28	PLM+	33.42	310.01	✕
study group	28	PLM+	11.61	397.56	✕
study group	28	PLM-	33.9	445.13	✕
study group	28	PLM+	27.17	662.64	○
study group	28	PLM+	16.91	673.62	○
study group	28	PLM+	17.01	387.86	✕
study group	28	PLM+	18.62	364.84	✕
study group	28	PLM+	11.44	591.35	○
study group	28	PLM+	27.93	384.73	✕
study group	28	PLM+	14.85	319.65	✕
study group	28	PLM-	9.02	458.4	✕
study group	28	PLM+	26.82	392.17	✕
study group	28	PLM+	18.47	466.92	✕
study group	28	PLM-	29.62	391.02	✕
study group	28	PLM+	25.08	499.23	○
study group	28	PLM-	7.15	511.83	○
study group	28	PLM+	28.32	476.78	✕
study group	28	PLM-	21.07	518.98	○
study group	28	PLM+	6.77	444.23	✕
study group	28	PLM+	25.49	392.55	✕
study group	28	PLM+	9.05	347.39	✕
study group	28	PLM-	10.68	327.4	✕
study group	28	PLM+	9.5	455.6	✕
study group	28	PLM+	20.49	565.75	○
study group	28	PLM+	20.7	465.45	✕
study group	28	PLM+	16.78	479.98	✕
study group	28	PLM-	3.54	288.45	✕
study group	28	PLM+	24.44	375	✕
study group	28	PLM-	8.39	428.98	✕
study group	28	PLM+	8.13	404.61	✕
study group	28	PLM+	14.33	413.43	✕
study group	28	PLM+	13.02	392.05	✕
study group	28	PLM+	17.02	459.2	✕
study group	28	PLM+	22.57	444.4	✕
study group	28	PLM+	1.34	341.24	✕
study group	28	PLM+	18.43	376.65	✕
study group	28	PLM+	25.45	492.72	○
study group	28	PLM+	33.05	366.81	✕
study group	28	PLM+	18.87	462.47	✕
study group	28	PLM+	15.91	386.83	✕
study group	28	PLM-	32.51	398.5	✕
study group	28	PLM-	20.05	347.74	✕
study group	28	PLM-	8.53	383.12	✕
study group	28	PLM+	21.08	418.17	✕
study group	28	PLM+	6.2	336.9	✕
study group	28	PLM+	8	432.95	✕
study group	28	PLM+	16.46	416.93	✕
study group	28	PLM+	15.09	417.52	✕
study group	28	PLM-	16.02	345.81	✕
study group	28	PLM+	24.8	556.31	○
study group	28	PLM+	15	415.98	✕
study group	28	PLM-	8.76	632.89	○
study group	28	PLM-	8.98	347.15	✕
study group	28	PLM+	17.55	380.47	✕
study group	28	PLM+	35.77	390.79	✕
study group	28	PLM-	15.94	539.58	○
study group	28	PLM-	16.34	441.25	✕
study group	28	PLM+	25.27	468.68	✕
study group	29	PLM+	19.06	506.3	○
study group	29	PLM+	25.04	477.25	✕
study group	29	PLM+	9.52	562.26	○
study group	29	PLM+	18.13	559.13	○
study group	29	PLM-	24.01	425.52	✕
study group	29	PLM-	17.62	442.76	✕
study group	29	PLM+	18.08	352.42	✕
study group	29	PLM+	16.78	502.76	○
study group	29	PLM+	20.17	381.32	✕
study group	29	PLM+	3.82	370.94	✕
study group	29	PLM+	19.72	366.83	✕
study group	29	PLM+	7.73	327.34	✕
study group	29	PLM+	34.53	580.05	○
study group	29	PLM+	11.87	313.56	✕
study group	29	PLM+	13.75	471.72	✕
study group	29	PLM+	13.95	399.16	✕
study group	29	PLM+	30.96	297.1	✕
study group	29	PLM+	30.28	532.45	○
study group	29	PLM+	21.8	321.36	✕
study group	29	PLM+	23.67	450.65	✕
study group	29	PLM+	9.25	361.01	✕
study group	29	PLM+	29.83	468.07	✕
study group	29	PLM+	24.1	426.65	✕
study group	29	PLM+	9.75	503.54	○
study group	29	PLM+	19.7	546.48	○
study group	29	PLM+	21.58	505.7	○
study group	29	PLM+	4.73	303.5	✕
study group	29	PLM+	4.06	299.8	✕
study group	29	PLM+	26.63	379.48	✕
study group	29	PLM+	18.54	419.94	✕
study group	29	PLM+	21.33	391.6	✕
study group	29	PLM-	20.53	361.88	✕
study group	29	PLM+	25.57	378.58	✕
study group	29	PLM+	21.63	418.85	✕
study group	29	PLM-	5.97	418.8	✕
study group	29	PLM+	4.27	407.75	✕
study group	29	PLM+	18.14	456.71	✕
study group	29	PLM+	10.03	434.29	✕
study group	29	PLM+	19.8	497.51	○
study group	29	PLM-	35.34	434.35	✕
study group	29	PLM-	3.76	390.76	✕
study group	29	PLM+	20.22	425.18	✕
study group	29	PLM-	16.42	485.39	○
study group	29	PLM+	33.55	345.2	✕
study group	29	PLM-	26.68	481.25	○
study group	29	PLM-	16.51	398.57	✕
study group	29	PLM+	11.29	499.2	○
study group	29	PLM+	31.93	394.48	✕
study group	29	PLM-	17.27	564.98	○
study group	29	PLM+	9.08	434.12	✕
study group	29	PLM+	39.04	319.45	✕
study group	29	PLM+	20.9	459.48	✕
study group	29	PLM-	27.06	376.77	✕
study group	29	PLM+	9.62	424.8	✕
study group	29	PLM+	9.36	405.5	✕
study group	29	PLM+	8.74	545.21	○
study group	29	PLM+	20.66	472.75	✕
study group	29	PLM+	29.18	495.78	○
study group	29	PLM+	23.67	292.04	✕
study group	29	PLM-	28.84	290.58	✕
study group	29	PLM+	17.92	567.55	○
study group	29	PLM+	19	706.25	○
study group	29	PLM+	22.64	408.95	✕
study group	29	PLM+	14.2	319.87	✕
study group	29	PLM+	10.7	504.07	○
study group	29	PLM+	35.73	450.47	✕
study group	29	PLM-	7.92	384.4	✕
study group	29	PLM+	32.49	340.57	✕
study group	29	PLM+	12.18	559.96	○
study group	29	PLM-	11.5	419.98	✕
study group	29	PLM+	29.4	514.25	○
study group	29	PLM+	6.72	452.25	✕
study group	29	PLM+	23.01	439.22	✕
study group	29	PLM+	25.4	500.15	○
study group	29	PLM+	23.01	272.78	✕
study group	29	PLM-	20.47	351.14	✕
study group	29	PLM+	22.05	387.1	✕
study group	29	PLM+	7.96	479.96	✕
study group	29	PLM+	6.3	627.48	○
study group	29	PLM+	14.01	470.43	✕
study group	29	PLM+	8.69	429.76	✕
study group	29	PLM+	14.81	424.6	✕
study group	29	PLM-	17.08	366.68	✕
study group	29	PLM-	20.62	456.9	✕
study group	29	PLM-	15.16	413.34	✕
study group	29	PLM+	13.86	335.89	✕
study group	29	PLM+	12.3	348.9	✕
study group	29	PLM+	12.73	452.77	✕
study group	29	PLM+	22.61	527.11	○
study group	29	PLM+	11.31	495.02	○
study group	29	PLM+	6.77	417.85	✕
study group	29	PLM+	10.96	543.4	○
study group	29	PLM+	20.01	388.42	✕
study group	29	PLM-	27.98	471.6	✕
study group	29	PLM+	20.11	412.95	✕
study group	29	PLM-	17.2	338.35	✕
study group	29	PLM+	25.85	503.33	○
study group	29	PLM+	29.54	346.02	✕
study group	29	PLM+	17.74	350.12	✕
study group	29	PLM+	6.31	428.05	✕
study group	29	PLM+	16.92	310.86	✕
study group	29	PLM+	42.51	383.92	✕
study group	29	PLM+	21.44	332.08	✕
study group	29	PLM-	13.88	549.15	○
study group	29	PLM+	20.16	471.37	✕
study group	29	PLM+	10.12	475.97	✕
study group	29	PLM+	10.09	514.21	○
study group	29	PLM+	13.07	456.6	✕
study group	29	PLM+	23.49	386.14	✕
study group	29	PLM+	7.24	380.51	✕
study group	29	PLM+	14.92	448.32	✕
study group	29	PLM-	19.41	372.26	✕
study group	29	PLM+	2.94	467.71	✕
study group	29	PLM-	5.36	369.67	✕
study group	29	PLM+	14.14	497.12	○
study group	29	PLM+	18.49	510.13	○
study group	29	PLM-	15.31	441.45	✕
study group	29	PLM+	9.94	539.74	○
study group	29	PLM+	19.08	385.9	✕
study group	29	PLM+	12.55	510.11	○
study group	29	PLM-	13.53	346.12	✕
study group	29	PLM-	21.05	460.08	✕
study group	29	PLM-	25.21	302.28	✕
study group	29	PLM+	22.66	342.88	✕
study group	29	PLM-	17.93	411.8	✕
study group	29	PLM+	10.69	397.78	✕
study group	29	PLM+	24.76	432.77	✕
study group	29	PLM+	23.69	458.9	✕
study group	29	PLM-	22.06	467.15	✕
study group	29	PLM+	25.18	409.92	✕
study group	29	PLM+	13.75	516.55	○
study group	29	PLM+	13.29	431.05	✕
study group	29	PLM+	28.98	430.98	✕
study group	29	PLM-	18.56	405.63	✕
study group	29	PLM+	12.38	393.28	✕
study group	30	PLM+	30.56	542.69	○
study group	30	PLM+	7.74	465.33	✕
study group	30	PLM+	20.71	500.3	○
study group	30	PLM-	5.24	474.88	✕
study group	30	PLM+	9.29	491.15	○
study group	30	PLM+	6.17	532.29	○
study group	30	PLM+	12	404.22	✕
study group	30	PLM+	10.25	493.67	○
study group	30	PLM+	21.65	421.36	✕
study group	30	PLM+	13.65	391.5	✕
study group	30	PLM+	22.08	465.11	✕
study group	30	PLM+	14.53	481	○
study group	30	PLM+	21.1	386.6	✕
study group	30	PLM-	32.43	368.15	✕
study group	30	PLM+	24.99	364.87	✕
study group	30	PLM+	32.95	519.81	○
study group	30	PLM+	16.08	388.23	✕
study group	30	PLM+	8.16	389	✕
study group	30	PLM+	12.34	433.4	✕
study group	30	PLM+	14.89	427.08	✕
study group	30	PLM+	8.17	527.64	○
study group	30	PLM+	29	387.97	✕
study group	30	PLM+	24.64	646	○
study group	30	PLM+	26.6	408.54	✕
study group	30	PLM+	17.11	310.99	✕
study group	30	PLM-	22.56	425.3	✕
study group	30	PLM+	14.46	408.18	✕
study group	30	PLM+	20.83	300.14	✕
study group	30	PLM+	23.34	477.53	✕
study group	30	PLM+	7.16	412.97	✕
study group	30	PLM+	21.98	485.25	○
study group	30	PLM+	25.56	369.01	✕
study group	30	PLM+	7.75	443.36	✕
study group	30	PLM+	8.43	479.18	✕
study group	30	PLM+	18.07	577.23	○
study group	30	PLM-	6.97	303.34	✕
study group	30	PLM-	15.92	372.94	✕
study group	30	PLM+	23	471.8	✕
study group	30	PLM-	32.94	326.07	✕
study group	30	PLM+	14.8	432.44	✕
study group	30	PLM-	24.65	452.35	✕
study group	30	PLM-	19.22	376.16	✕
study group	30	PLM+	4.73	444.43	✕
study group	30	PLM+	4.66	398.95	✕
study group	30	PLM-	8.12	343.8	✕
study group	30	PLM+	23.56	359.64	✕
study group	30	PLM+	21.41	515.81	○
study group	30	PLM+	10.41	343.62	✕
study group	30	PLM-	8.89	481.7	○
study group	30	PLM+	14.48	394.81	✕
study group	30	PLM-	28.88	439.96	✕
study group	30	PLM-	23.25	485.54	○
study group	30	PLM+	32.97	395.44	✕
study group	30	PLM-	25.11	465.42	✕
study group	30	PLM-	24.38	340.62	✕
study group	30	PLM-	18.92	470.73	✕
study group	30	PLM+	7.74	460.31	✕
study group	30	PLM+	35.74	399.9	✕
study group	30	PLM+	24.34	446.16	✕
study group	30	PLM-	6.52	485.79	○
study group	30	PLM+	6.46	399.3	✕
study group	30	PLM-	6.19	373.75	✕
study group	30	PLM+	12.21	366.04	✕
study group	30	PLM+	24.05	292.84	✕
study group	30	PLM+	20.13	433.3	✕
study group	30	PLM+	13.66	342.06	✕
study group	30	PLM+	8.92	441.75	✕
study group	30	PLM+	9.75	497.08	○
study group	30	PLM+	14.09	362.1	✕
study group	30	PLM-	30.1	311.35	✕
study group	30	PLM-	25.98	417.49	✕
study group	30	PLM+	21.18	562.61	○
study group	30	PLM+	22.64	547.86	○
study group	30	PLM+	17.53	456.59	✕
study group	30	PLM+	8.31	479.1	✕
study group	30	PLM+	37.08	355.12	✕
study group	30	PLM+	37.05	462.65	✕
study group	30	PLM+	11.38	438.88	✕
study group	30	PLM+	28.86	383.9	✕
study group	30	PLM+	7.85	457.43	✕
study group	30	PLM+	25.42	422.68	✕
study group	30	PLM-	35.09	549.63	○
study group	30	PLM+	6.96	370.35	✕
study group	30	PLM+	18.41	484.43	○
study group	30	PLM-	24.65	441.65	✕
study group	30	PLM+	12.74	343.1	✕
study group	30	PLM-	6.82	413.65	✕
study group	30	PLM+	26.15	374.24	✕
study group	30	PLM+	22.34	439.78	✕
study group	30	PLM+	16.27	333.87	✕
study group	30	PLM+	15.23	441.17	✕
study group	30	PLM+	10.64	350.97	✕
study group	30	PLM-	9.03	453.31	✕
study group	30	PLM+	16.7	330.85	✕
study group	30	PLM+	17	652.74	○
study group	30	PLM+	16.55	487.63	○
study group	30	PLM-	5.81	359.37	✕
study group	30	PLM-	11.61	308.26	✕
study group	30	PLM+	16.34	487.42	○
study group	30	PLM-	6.54	478.44	✕
study group	30	PLM+	27.85	410.56	✕
study group	30	PLM+	10.9	531.55	○
study group	30	PLM+	13.44	368.49	✕
study group	30	PLM+	22.81	450.32	✕
study group	30	PLM+	17.42	370.82	✕
study group	30	PLM+	1.93	371.83	✕
study group	30	PLM-	10.27	360.01	✕
study group	30	PLM+	17.52	429.82	✕
study group	30	PLM+	9.25	480	○
study group	30	PLM+	10.74	316.2	✕
study group	30	PLM+	10.04	413.23	✕
study group	30	PLM-	20.14	450.31	✕
study group	30	PLM+	38.5	342.93	✕
study group	30	PLM-	7.44	429.32	✕
study group	30	PLM-	22.71	414.82	✕
study group	30	PLM+	5.11	497.78	○
study group	30	PLM+	8.67	348.62	✕
study group	30	PLM+	19.75	387.81	✕
study group	30	PLM+	7.83	375.36	✕
study group	30	PLM+	4.88	437.09	✕
study group	30	PLM+	2.21	536.5	○
study group	30	PLM+	37.51	375.75	✕
study group	30	PLM+	7.46	446.78	✕
study group	30	PLM+	17.06	474.08	✕
study group	30	PLM+	35.04	556.02	○
study group	30	PLM+	19.75	405.92	✕
study group	30	PLM+	14.55	393.5	✕
study group	30	PLM-	22.17	517.2	○
study group	30	PLM+	16.99	501.2	○
study group	30	PLM-	9.61	315.75	✕
study group	30	PLM+	12.94	348.37	✕
study group	30	PLM-	29.98	435.88	✕
study group	30	PLM+	16.95	476.9	✕
study group	30	PLM+	10.37	425.93	✕
study group	30	PLM+	14.12	303.54	✕
study group	30	PLM+	25.7	356.08	✕
study group	30	PLM+	11.38	385.22	✕
study group	30	PLM-	26.76	439.68	✕
study group	30	PLM+	19	369.62	✕
study group	30	PLM+	9.82	473.05	✕
study group	30	PLM+	19.82	410.9	✕
study group	30	PLM+	23.25	419.31	✕
study group	30	PLM+	16.62	556.02	○
study group	30	PLM-	22.47	385.1	✕
study group	30	PLM-	15.25	406.7	✕
study group	30	PLM+	17.42	447.89	✕
study group	31	PLM+	8.91	486.33	○
study group	31	PLM+	27.25	528.32	○
study group	31	PLM+	21.1	511.87	○
study group	31	PLM-	3.22	546.54	○
study group	31	PLM+	5.64	511.5	○
study group	31	PLM-	22.39	517.05	○
study group	31	PLM+	7.54	501.42	○
study group	31	PLM-	7.59	489.27	○
study group	31	PLM+	5.26	544.3	○
study group	31	PLM-	16.87	418.1	✕
study group	31	PLM+	18.01	391.56	✕
study group	31	PLM+	21.58	451.65	✕
study group	31	PLM+	7.11	323.89	✕
study group	31	PLM+	20.23	400.4	✕
study group	31	PLM+	14.68	344.02	✕
study group	31	PLM+	12.12	523.3	○
study group	31	PLM+	21.52	411.23	✕
study group	31	PLM+	21.67	485.5	○
study group	31	PLM+	20.51	528.24	○
study group	31	PLM+	13.25	254.12	✕
study group	31	PLM+	16.9	288.64	✕
study group	31	PLM+	20.44	271.49	✕
study group	31	PLM+	20.5	467.93	✕
study group	31	PLM+	13.07	401.82	✕
study group	31	PLM+	5.93	491.96	○
study group	31	PLM+	23.61	266.08	✕
study group	31	PLM+	4.2	356.55	✕
study group	31	PLM+	13.88	384.3	✕
study group	31	PLM+	17.4	500.05	○
study group	31	PLM+	17.95	544.15	○
study group	31	PLM+	12.17	532.75	○
study group	31	PLM+	28.41	536.21	○
study group	31	PLM+	17.58	463.08	✕
study group	31	PLM+	22.31	490.22	○
study group	31	PLM+	9.55	552.72	○
study group	31	PLM-	17.94	517.36	○
study group	31	PLM+	24.41	359.97	✕
study group	31	PLM+	8.93	443.62	✕
study group	31	PLM-	13.12	531.6	○
study group	31	PLM+	18.58	545.66	○
study group	31	PLM+	6.37	284.84	✕
study group	31	PLM-	8.72	275.78	✕
study group	31	PLM+	11.3	394.85	✕
study group	31	PLM+	22.22	407.77	✕
study group	31	PLM+	15.85	446.5	✕
study group	31	PLM-	18.45	350.82	✕
study group	31	PLM+	11.79	391.45	✕
study group	31	PLM-	16.64	393.83	✕
study group	31	PLM+	17.09	366.95	✕
study group	31	PLM+	5.64	408.68	✕
study group	31	PLM+	12.31	444.85	✕
study group	31	PLM+	7.98	324.97	✕
study group	31	PLM+	34.71	470.47	✕
study group	31	PLM+	19.87	405.62	✕
study group	31	PLM+	13.29	517.89	○
study group	31	PLM+	12.81	350.57	✕
study group	31	PLM-	11.71	446.57	✕
study group	31	PLM-	20.29	373.03	✕
study group	31	PLM+	12.45	266.54	✕
study group	31	PLM-	16.76	432.6	✕
study group	31	PLM+	13.38	458.12	✕
study group	31	PLM+	30.7	360.23	✕
study group	31	PLM-	19.42	581.89	○
study group	31	PLM+	15.54	476.32	✕
study group	31	PLM+	6.77	402.28	✕
study group	31	PLM+	26.58	435.34	✕
study group	31	PLM+	12.31	410.7	✕
study group	31	PLM+	7.2	577.94	○
study group	31	PLM-	8.59	426.2	✕
study group	31	PLM+	25.14	360.05	✕
study group	31	PLM+	22.58	349.72	✕
study group	31	PLM+	5.79	521.57	○
study group	31	PLM+	19.02	376.56	✕
study group	31	PLM+	5.48	505.08	○
study group	31	PLM+	7.28	539.46	○
study group	31	PLM+	11.83	300.1	✕
study group	31	PLM+	26.71	399.87	✕
study group	31	PLM+	25.09	429.53	✕
study group	31	PLM+	13.48	393.6	✕
study group	31	PLM+	23.19	473.85	✕
study group	31	PLM+	23.11	289.94	✕
study group	31	PLM+	15.13	390.05	✕
study group	31	PLM+	14.49	388.47	✕
study group	31	PLM+	10.83	540	○
study group	31	PLM+	28.01	440.81	✕
study group	31	PLM+	10.27	372.46	✕
study group	31	PLM+	29.06	363.7	✕
study group	31	PLM+	23.71	416.72	✕
study group	31	PLM+	21.4	506.47	○
study group	31	PLM+	4.57	398.15	✕
study group	31	PLM-	22.14	299.8	✕
study group	31	PLM+	9.25	461.9	✕
study group	31	PLM+	22.16	457.07	✕
study group	31	PLM+	17.37	461.97	✕
study group	31	PLM-	5.02	412.95	✕
study group	31	PLM+	17.18	371.58	✕
study group	31	PLM+	23.57	418.98	✕
study group	31	PLM+	12.82	419.77	✕
study group	31	PLM-	7.26	545.74	○
study group	31	PLM+	18.72	490.01	○
study group	31	PLM+	11.84	399.35	✕
study group	31	PLM-	15.97	491.18	○
study group	31	PLM+	20.26	416.3	✕
study group	31	PLM-	21	363.45	✕
study group	31	PLM+	18.6	508.08	○
study group	31	PLM+	22.98	351.15	✕
study group	31	PLM-	7.79	380.87	✕
study group	31	PLM+	9.49	457.05	✕
study group	31	PLM+	13.33	444.43	✕
study group	31	PLM-	14	535.63	○
study group	31	PLM+	21.01	443.82	✕
study group	31	PLM+	14.13	530.02	○
study group	31	PLM-	22.54	305.37	✕
study group	31	PLM-	19.47	382.1	✕
study group	31	PLM+	28.8	350.94	✕
study group	31	PLM+	2.25	345.47	✕
study group	31	PLM+	20.99	369.85	✕
study group	31	PLM+	24.96	479.47	✕
study group	31	PLM+	21.99	288.2	✕
study group	31	PLM+	17.08	410.82	✕
study group	31	PLM+	10.54	441.95	✕
study group	31	PLM+	6.54	479.22	✕
study group	31	PLM+	32.81	446.22	✕
study group	31	PLM+	20.99	389.8	✕
study group	31	PLM+	10.59	506.35	○
study group	31	PLM-	19.69	323.29	✕
study group	31	PLM+	8.63	350.16	✕
study group	31	PLM+	2.8	596.2	○
study group	31	PLM+	6.49	524.91	○
study group	31	PLM+	4.3	394.6	✕
study group	31	PLM+	11.99	336.48	✕
study group	31	PLM+	4.91	357.55	✕
study group	31	PLM+	5.2	582.88	○
study group	31	PLM+	12.79	430	✕
study group	31	PLM-	13.84	422.85	✕
study group	31	PLM+	24.04	587.96	○
study group	31	PLM+	37.02	401.93	✕
study group	31	PLM-	12.96	418.33	✕
study group	31	PLM+	11.92	510.6	○
study group	31	PLM+	16.14	380.01	✕
study group	31	PLM+	9.45	565.37	○
study group	31	PLM+	25.03	496.2	○
study group	31	PLM+	14.83	334.47	✕
study group	31	PLM-	14.24	392.1	✕
study group	31	PLM+	13.71	331.1	✕
study group	31	PLM+	16.7	406.2	✕
study group	31	PLM-	25.65	450.45	✕
study group	31	PLM+	12.14	365.53	✕
study group	31	PLM+	17.17	470.79	✕
study group	31	PLM+	17.64	499.97	○
study group	31	PLM+	22.09	402.3	✕
study group	31	PLM-	15.79	314.52	✕
study group	31	PLM+	25.8	432.03	✕
study group	31	PLM+	14.63	396.5	✕
study group	31	PLM+	17.91	446.98	✕
study group	31	PLM-	29.94	308.78	✕
study group	31	PLM+	31.08	375	✕
study group	31	PLM+	11.15	518.79	○
study group	31	PLM+	25.32	384.45	✕
study group	31	PLM+	15.52	473.94	✕
study group	31	PLM+	13.67	435.51	✕
study group	31	PLM-	11.77	450.95	✕
study group	31	PLM-	23.63	468.17	✕
study group	31	PLM+	24.56	538.83	○
study group	32	PLM+	29.11	496.58	○
study group	32	PLM+	16.85	542.52	○
study group	32	PLM-	5.79	455.4	✕
study group	32	PLM-	28.76	430.23	✕
study group	32	PLM-	3.34	452.49	✕
study group	32	PLM-	18.38	515.02	○
study group	32	PLM+	13.31	530.05	○
study group	32	PLM+	10.04	320.85	✕
study group	32	PLM+	11.95	375.29	✕
study group	32	PLM+	14.48	401.58	✕
study group	32	PLM+	11.41	411.63	✕
study group	32	PLM+	15.68	485.25	○
study group	32	PLM+	31.12	376.12	✕
study group	32	PLM+	26.32	340.78	✕
study group	32	PLM+	14.18	326.97	✕
study group	32	PLM+	12.35	414.92	✕
study group	32	PLM+	8.27	362.25	✕
study group	32	PLM+	9.61	323.3	✕
study group	32	PLM+	21.57	466.65	✕
study group	32	PLM+	22.05	535.28	○
study group	32	PLM+	16.36	393.97	✕
study group	32	PLM+	18.79	358.9	✕
study group	32	PLM+	23.58	325.97	✕
study group	32	PLM+	19.61	373.15	✕
study group	32	PLM+	5.77	421.76	✕
study group	32	PLM-	22.82	394.52	✕
study group	32	PLM+	25.09	273.18	✕
study group	32	PLM+	31.27	527.53	○
study group	32	PLM+	20.76	358.24	✕
study group	32	PLM-	2.33	387.15	✕
study group	32	PLM+	19.01	344.02	✕
study group	32	PLM+	14.26	329.16	✕
study group	32	PLM+	22.47	378.82	✕
study group	32	PLM-	20.58	443.45	✕
study group	32	PLM+	14.29	517.04	○
study group	32	PLM+	13.26	480.89	○
study group	32	PLM+	14.89	538.88	○
study group	32	PLM+	15.29	350.55	✕
study group	32	PLM+	18.15	301.79	✕
study group	32	PLM+	7.89	498.8	○
study group	32	PLM+	11.09	508.68	○
study group	32	PLM-	19.66	422.16	✕
study group	32	PLM+	7.36	423.2	✕
study group	32	PLM+	20.91	422.72	✕
study group	32	PLM+	5.42	342.06	✕
study group	32	PLM+	10.57	485.26	○
study group	32	PLM-	3.93	296.97	✕
study group	32	PLM+	16.01	402.21	✕
study group	32	PLM+	19.63	359.64	✕
study group	32	PLM-	16.78	455.91	✕
study group	32	PLM+	10.31	380.3	✕
study group	32	PLM+	24.3	372.63	✕
study group	32	PLM-	10.09	418.53	✕
study group	32	PLM+	10.87	347.55	✕
study group	32	PLM-	28.23	423.24	✕
study group	32	PLM-	16.77	363.95	✕
study group	32	PLM+	25.68	391.19	✕
study group	32	PLM+	10.85	461.15	✕
study group	32	PLM-	6.7	337.61	✕
study group	32	PLM+	16.58	560.5	○
study group	32	PLM-	13.67	550.25	○
study group	32	PLM-	8.94	447.08	✕
study group	32	PLM+	5.09	453.79	✕
study group	32	PLM-	9.61	445.35	✕
study group	32	PLM-	19.68	485.4	○
study group	32	PLM+	9.67	454.92	✕
study group	32	PLM+	14.09	455.09	✕
study group	32	PLM-	6.65	493.6	○
study group	32	PLM+	7.46	482.85	○
study group	32	PLM+	11.31	432.93	✕
study group	32	PLM+	9.6	604.65	○
study group	32	PLM+	23.16	529.89	○
study group	32	PLM+	8.5	388.96	✕
study group	32	PLM+	12.27	377.75	✕
study group	32	PLM+	26.5	497.72	○
study group	32	PLM+	25.98	400.65	✕
study group	32	PLM+	22.65	387.77	✕
study group	32	PLM-	13.92	520.94	○
study group	32	PLM-	11.2	401.5	✕
study group	32	PLM+	4.82	458.64	✕
study group	32	PLM-	14.38	477.5	✕
study group	32	PLM-	15.72	414.76	✕
study group	32	PLM-	19.12	290.27	✕
study group	32	PLM-	22.87	440.92	✕
study group	32	PLM+	11.39	475.92	✕
study group	32	PLM+	12.82	442.85	✕
study group	32	PLM-	17.73	463.42	✕
study group	32	PLM+	13.16	452.77	✕
study group	32	PLM+	13.86	484.4	○
study group	32	PLM+	20.15	351.81	✕
study group	32	PLM+	23.82	391.87	✕
study group	32	PLM+	14	380.52	✕
study group	32	PLM+	24.33	369.22	✕
study group	32	PLM+	23.45	346.38	✕
study group	32	PLM+	18.18	413.68	✕
study group	32	PLM+	8.84	458.76	✕
study group	32	PLM+	18.7	519.77	○
study group	32	PLM-	21.44	522.74	○
study group	32	PLM+	21.83	387.6	✕
study group	32	PLM-	16.43	438.22	✕
study group	32	PLM-	15.52	429.7	✕
study group	32	PLM-	9.24	379.05	✕
study group	32	PLM+	26.75	396.39	✕
study group	32	PLM+	16.48	364.73	✕
study group	32	PLM+	16.84	358.23	✕
study group	32	PLM+	17.51	450.7	✕
study group	32	PLM+	12.81	451.32	✕
study group	32	PLM-	7.39	373.76	✕
study group	32	PLM+	15.75	379.83	✕
study group	32	PLM+	16.48	756.05	○
study group	32	PLM+	19.01	430.51	✕
study group	32	PLM-	9.81	393.05	✕
study group	32	PLM+	12.36	429.08	✕
study group	32	PLM-	7.48	305.8	✕
study group	32	PLM+	20.11	425.14	✕
study group	32	PLM+	24.63	435.47	✕
study group	32	PLM-	12.04	367.78	✕
study group	32	PLM+	6.4	385.29	✕
study group	32	PLM+	27.25	496.3	○
study group	32	PLM+	13.73	544.8	○
study group	32	PLM-	30.77	317.52	✕
study group	32	PLM+	25.78	448.89	✕
study group	32	PLM+	15.09	414.25	✕
study group	32	PLM+	2.17	340.21	✕
study group	32	PLM+	17.19	443.12	✕
study group	32	PLM-	21.62	392.83	✕
study group	32	PLM+	19.96	460.61	✕
study group	32	PLM+	17.14	434.45	✕
study group	32	PLM+	12.04	365.61	✕
study group	32	PLM-	28.31	368.09	✕
study group	32	PLM+	25.23	377.07	✕
study group	32	PLM+	7.61	601.99	○
study group	32	PLM+	19.08	330.25	✕
study group	32	PLM+	7.7	503.98	○
study group	32	PLM+	2.23	351.24	✕
study group	32	PLM+	19.98	416.57	✕
study group	32	PLM-	19	398.84	✕
study group	32	PLM+	23.47	460.27	✕
study group	32	PLM+	33.56	432.4	✕
study group	32	PLM-	15.59	423.55	✕
study group	32	PLM+	10.9	421.84	✕
study group	32	PLM+	15.29	405.57	✕
study group	32	PLM+	5.89	549.93	○
study group	32	PLM+	21.96	447.55	✕
study group	32	PLM-	13.13	336.25	✕
study group	32	PLM-	7.18	371.6	✕
study group	32	PLM+	12.96	313.88	✕
study group	32	PLM-	19.88	457.06	✕
study group	32	PLM+	17.26	431.53	✕
study group	32	PLM+	16.93	293.9	✕
study group	32	PLM+	12.21	475.31	✕
study group	32	PLM+	17.83	388.98	✕
study group	32	PLM-	22.8	359.66	✕
study group	32	PLM+	14.99	368.34	✕
study group	32	PLM+	14.16	459.73	✕
study group	32	PLM+	16.63	361.55	✕
study group	32	PLM-	33.6	400.08	✕
study group	32	PLM+	19.95	412.87	✕
study group	32	PLM+	4.99	377.2	✕
study group	32	PLM-	15.79	274.95	✕
study group	32	PLM+	4.69	280.66	✕
study group	32	PLM-	13.47	366.32	✕
study group	32	PLM-	17.11	547.48	○
study group	32	PLM+	17.21	613.09	○
study group	32	PLM+	16.37	423.53	✕
study group	33	PLM+	27.04	487.73	○
study group	33	PLM+	16.34	536.36	○
study group	33	PLM+	2.91	441.64	✕
study group	33	PLM+	12.52	538.9	○
study group	33	PLM+	8.06	356.87	✕
study group	33	PLM+	7.78	499.58	○
study group	33	PLM+	8.12	462.13	✕
study group	33	PLM+	4.87	511.95	○
study group	33	PLM-	23.19	368.68	✕
study group	33	PLM+	10.28	315.67	✕
study group	33	PLM+	8.17	413.65	✕
study group	33	PLM+	13.5	380.43	✕
study group	33	PLM+	21.11	423.25	✕
study group	33	PLM+	10.67	459.17	✕
study group	33	PLM+	17.93	339.47	✕
study group	33	PLM+	13.02	293.06	✕
study group	33	PLM+	8.54	366.65	✕
study group	33	PLM+	8.2	526.1	○
study group	33	PLM+	15.44	320.3	✕
study group	33	PLM+	22.71	318.28	✕
study group	33	PLM+	16.26	489.57	○
study group	33	PLM+	16.01	522.79	○
study group	33	PLM+	9.94	449.4	✕
study group	33	PLM+	16.95	356.15	✕
study group	33	PLM+	4.49	402.85	✕
study group	33	PLM-	16.22	556.77	○
study group	33	PLM+	8.34	367.6	✕
study group	33	PLM+	32.1	498.62	○
study group	33	PLM-	30.94	357.82	✕
study group	33	PLM+	14.7	551.17	○
study group	33	PLM-	18.79	486.08	○
study group	33	PLM+	7.55	487.75	○
study group	33	PLM+	26.3	366.18	✕
study group	33	PLM+	21.51	502.94	○
study group	33	PLM-	21.67	446.35	✕
study group	33	PLM+	7.52	479.56	✕
study group	33	PLM-	14.45	485.68	○
study group	33	PLM+	31.35	503.6	○
study group	33	PLM+	8	485.71	○
study group	33	PLM+	8.79	466.51	✕
study group	33	PLM+	7.31	470.47	✕
study group	33	PLM-	19.62	365.53	✕
study group	33	PLM+	10.09	592.34	○
study group	33	PLM+	9.79	510.3	○
study group	33	PLM+	21.38	463.55	✕
study group	33	PLM+	7.85	368.37	✕
study group	33	PLM-	5.16	335.65	✕
study group	33	PLM+	15.58	406.38	✕
study group	33	PLM+	16.06	485.1	○
study group	33	PLM+	17.02	360.27	✕
study group	33	PLM-	15.69	529.44	○
study group	33	PLM+	10.12	346.62	✕
study group	33	PLM+	14.49	430.72	✕
study group	33	PLM+	7.83	429.28	✕
study group	33	PLM+	14.45	419.95	✕
study group	33	PLM+	6.76	523.48	○
study group	33	PLM-	13.44	375.58	✕
study group	33	PLM-	7.88	473.9	✕
study group	33	PLM+	21.52	452.82	✕
study group	33	PLM+	16.42	428.58	✕
study group	33	PLM+	17.41	379.12	✕
study group	33	PLM+	2.65	486	○
study group	33	PLM-	20.2	476.73	✕
study group	33	PLM+	15.93	362.05	✕
study group	33	PLM+	22.31	389.71	✕
study group	33	PLM-	20.6	476.2	✕
study group	33	PLM-	16.19	485.18	○
study group	33	PLM+	16.92	413.29	✕
study group	33	PLM-	18.31	475.64	✕
study group	33	PLM-	5.84	473.48	✕
study group	33	PLM+	6.87	400.9	✕
study group	33	PLM-	21.2	405.2	✕
study group	33	PLM+	10.91	415.86	✕
study group	33	PLM-	6.19	470.87	✕
study group	33	PLM+	23.2	500.51	○
study group	33	PLM+	10.28	401	✕
study group	33	PLM+	8.3	378.53	✕
study group	33	PLM+	42.01	398.53	✕
study group	33	PLM-	23.1	329.79	✕
study group	33	PLM-	5.86	506.68	○
study group	33	PLM+	11.37	458.63	✕
study group	33	PLM+	7.99	483.97	○
study group	33	PLM-	9.3	415.97	✕
study group	33	PLM+	14.27	272.27	✕
study group	33	PLM-	28.79	347.08	✕
study group	33	PLM-	15	266.28	✕
study group	33	PLM+	10.53	364.63	✕
study group	33	PLM+	19.04	534.22	○
study group	33	PLM+	11.52	432.78	✕
study group	33	PLM+	20.12	345.85	✕
study group	33	PLM+	11.44	482.94	○
study group	33	PLM+	13.32	418.63	✕
study group	33	PLM+	19.7	415.42	✕
study group	33	PLM-	9.63	429.6	✕
study group	33	PLM+	7.23	362.53	✕
study group	33	PLM+	17.74	466.14	✕
study group	33	PLM+	18.58	446.02	✕
study group	33	PLM-	22.16	397.15	✕
study group	33	PLM-	16.54	397.06	✕
study group	33	PLM+	12.86	480.78	○
study group	33	PLM+	18.21	421.12	✕
study group	33	PLM+	19.03	463.22	✕
study group	33	PLM+	15.66	419.13	✕
study group	33	PLM+	8.39	387.51	✕
study group	33	PLM+	17.26	436.08	✕
study group	33	PLM+	10.76	465.48	✕
study group	33	PLM+	6.81	359.3	✕
study group	33	PLM-	10.48	485.54	○
study group	33	PLM+	17.33	320.37	✕
study group	33	PLM+	17.04	533.99	○
study group	33	PLM+	13.51	348.68	✕
study group	33	PLM-	8.7	387.35	✕
study group	33	PLM+	8.58	333.65	✕
study group	33	PLM-	6.43	288.4	✕
study group	33	PLM+	13.23	297.85	✕
study group	33	PLM+	18.16	420.08	✕
study group	33	PLM-	8.94	430.07	✕
study group	33	PLM+	27.48	406.58	✕
study group	33	PLM+	10.88	519.32	○
study group	33	PLM+	32.04	415.66	✕
study group	33	PLM-	23.98	460.77	✕
study group	33	PLM+	12.78	389.5	✕
study group	33	PLM+	16.26	374.94	✕
study group	33	PLM-	16.35	420	✕
study group	33	PLM+	10.86	317.35	✕
study group	33	PLM+	13.8	330.4	✕
study group	33	PLM+	15.72	420.37	✕
study group	33	PLM-	8.63	596.02	○
study group	33	PLM-	19.57	408.73	✕
study group	33	PLM+	17.25	310.51	✕
study group	33	PLM+	16.32	416.85	✕
study group	33	PLM+	6.52	383.11	✕
study group	33	PLM+	16.72	359.97	✕
study group	33	PLM+	12.22	422.13	✕
study group	33	PLM+	6.37	422.2	✕
study group	33	PLM+	21.89	445.46	✕
study group	33	PLM+	9.39	598.08	○
study group	33	PLM+	3.76	359.83	✕
study group	33	PLM+	12.35	516.45	○
study group	33	PLM+	17.18	299.97	✕
study group	33	PLM+	8.85	310.74	✕
study group	33	PLM+	26.1	303.05	✕
study group	33	PLM+	3.13	379.1	✕
study group	33	PLM+	13.57	370.25	✕
study group	33	PLM-	4.61	315.1	✕
study group	33	PLM+	31.99	407.57	✕
study group	33	PLM-	7.86	407.37	✕
study group	33	PLM+	9.19	487.32	○
study group	33	PLM+	4.85	553.71	○
study group	33	PLM+	17.53	456.48	✕
study group	33	PLM+	14.56	314.84	✕
study group	33	PLM+	23.32	378.28	✕
study group	33	PLM+	7.22	406.02	✕
study group	33	PLM+	24.17	327.53	✕
study group	33	PLM-	9.39	400.86	✕
study group	33	PLM+	23.02	372.85	✕
study group	33	PLM+	14.33	391.43	✕
study group	33	PLM+	17.58	454.36	✕
study group	33	PLM+	18.9	294.25	✕
study group	33	PLM+	9.29	283.82	✕
study group	33	PLM-	26.39	450.58	✕
study group	33	PLM+	26.91	404.11	✕
study group	33	PLM+	12.75	399.07	✕
study group	33	PLM+	23.71	407.18	✕
study group	33	PLM+	18.21	525.39	○
study group	33	PLM+	7.93	315.15	✕
study group	33	PLM+	16.82	368.62	✕
study group	33	PLM+	14.7	459.18	✕
study group	33	PLM+	21.57	409.25	✕
study group	33	PLM-	7.28	376.33	✕
study group	33	PLM-	13.35	366.95	✕
study group	33	PLM+	19.26	504.73	○
study group	33	PLM+	18.32	471.89	✕
study group	34	PLM+	20.08	514.55	○
study group	34	PLM+	11.47	502.87	○
study group	34	PLM+	13.42	540.75	○
study group	34	PLM+	4.07	424.42	✕
study group	34	PLM+	10.63	524.13	○
study group	34	PLM+	3.13	480.51	○
study group	34	PLM+	10.72	531.66	○
study group	34	PLM+	12.77	375.35	✕
study group	34	PLM+	6.6	507.11	○
study group	34	PLM+	4.29	473.76	✕
study group	34	PLM+	8.9	496	○
study group	34	PLM+	16.81	435.2	✕
study group	34	PLM+	15.29	401.38	✕
study group	34	PLM+	15.21	397.83	✕
study group	34	PLM+	22.8	432.85	✕
study group	34	PLM+	6.68	472.78	✕
study group	34	PLM+	9.77	400.96	✕
study group	34	PLM+	22.67	420.23	✕
study group	34	PLM+	21.29	381.17	✕
study group	34	PLM+	26.86	466.09	✕
study group	34	PLM+	12.18	310.62	✕
study group	34	PLM+	10.89	391.67	✕
study group	34	PLM+	5.49	296.24	✕
study group	34	PLM+	6.46	344.56	✕
study group	34	PLM+	16.77	505.15	○
study group	34	PLM+	12.02	259.36	✕
study group	34	PLM+	4.01	389.97	✕
study group	34	PLM+	22.39	379.73	✕
study group	34	PLM+	20.84	573.38	○
study group	34	PLM-	14.24	394.37	✕
study group	34	PLM+	16.9	444.28	✕
study group	34	PLM+	15.06	328.63	✕
study group	34	PLM+	5.94	460.46	✕
study group	34	PLM+	15.98	426.12	✕
study group	34	PLM+	15.85	397.65	✕
study group	34	PLM+	12.48	268.02	✕
study group	34	PLM+	21.22	268.5	✕
study group	34	PLM-	8.88	346.97	✕
study group	34	PLM+	14.61	490.03	○
study group	34	PLM+	26.84	341.63	✕
study group	34	PLM+	5.85	378.45	✕
study group	34	PLM+	7.37	332.46	✕
study group	34	PLM+	17.69	438.78	✕
study group	34	PLM+	17.89	411.02	✕
study group	34	PLM+	6.65	421.08	✕
study group	34	PLM+	23.18	531.07	○
study group	34	PLM+	18.39	415.62	✕
study group	34	PLM-	18.28	385.1	✕
study group	34	PLM+	28.18	498.52	○
study group	34	PLM+	13.22	319.84	✕
study group	34	PLM+	11.66	443.23	✕
study group	34	PLM+	10.16	536.52	○
study group	34	PLM+	11.53	443.5	✕
study group	34	PLM+	27.76	501.68	○
study group	34	PLM-	14.16	273.08	✕
study group	34	PLM+	9.6	455.1	✕
study group	34	PLM+	13.95	505.15	○
study group	34	PLM+	14.28	621.47	○
study group	34	PLM-	3.83	346.05	✕
study group	34	PLM+	14.29	345.52	✕
study group	34	PLM+	16.91	472.74	✕
study group	34	PLM-	20.11	384	✕
study group	34	PLM+	17.19	502.9	○
study group	34	PLM+	15.41	445.67	✕
study group	34	PLM+	14.53	509	○
study group	34	PLM+	9.23	492.88	○
study group	34	PLM+	17.32	347.87	✕
study group	34	PLM+	28.78	466.63	✕
study group	34	PLM+	8.28	396.91	✕
study group	34	PLM-	6.11	359.97	✕
study group	34	PLM+	15.92	412.97	✕
study group	34	PLM+	4.44	314.15	✕
study group	34	PLM+	18.78	508.63	○
study group	34	PLM+	20.21	399.92	✕
study group	34	PLM-	9.58	366.02	✕
study group	34	PLM-	16.32	530.58	○
study group	34	PLM+	15.95	422.55	✕
study group	34	PLM-	6.17	525.57	○
study group	34	PLM+	4.55	467.74	✕
study group	34	PLM+	13.98	465.08	✕
study group	34	PLM+	8.55	426.39	✕
study group	34	PLM+	21.09	459.54	✕
study group	34	PLM+	6.02	397.38	✕
study group	34	PLM+	14.25	475.03	✕
study group	34	PLM+	25.3	504.85	○
study group	34	PLM+	5.27	499.86	○
study group	34	PLM+	18.24	377.74	✕
study group	34	PLM+	6.64	439.27	✕
study group	34	PLM+	15.88	394.57	✕
study group	34	PLM+	21.6	399.66	✕
study group	34	PLM+	22.19	380.4	✕
study group	34	PLM+	22.21	431.84	✕
study group	34	PLM+	12.42	312.45	✕
study group	34	PLM+	12.18	532.25	○
study group	34	PLM+	13.76	380.63	✕
study group	34	PLM+	8.68	515.55	○
study group	34	PLM-	9.18	402.45	✕
study group	34	PLM+	7.06	485.23	○
study group	34	PLM+	22.99	485.7	○
study group	34	PLM-	9	389.45	✕
study group	34	PLM+	10.35	428.5	✕
study group	34	PLM+	18.35	385.16	✕
study group	34	PLM+	3.66	422.52	✕
study group	34	PLM+	15.42	457.18	✕
study group	34	PLM+	19.87	409.05	✕
study group	34	PLM-	21.36	427.53	✕
study group	34	PLM+	18.11	452.05	✕
study group	34	PLM+	11.51	464.73	✕
study group	34	PLM-	19.92	400.9	✕
study group	34	PLM+	8.72	335.3	✕
study group	34	PLM+	10.31	539.98	○
study group	34	PLM+	7.26	369.45	✕
study group	34	PLM+	10.7	447.36	✕
study group	34	PLM+	15.59	521.23	○
study group	34	PLM+	15.59	488.82	○
study group	34	PLM-	11.51	493.02	○
study group	34	PLM+	7.16	335.04	✕
study group	34	PLM-	10.43	408.65	✕
study group	34	PLM+	12.69	541.3	○
study group	34	PLM+	10.85	312.03	✕
study group	34	PLM+	17.6	400.21	✕
study group	34	PLM-	6.32	544.97	○
study group	34	PLM+	12.82	317.5	✕
study group	34	PLM+	18.13	497.1	○
study group	34	PLM-	7.56	327	✕
study group	34	PLM+	22.1	578.95	○
study group	34	PLM+	17.7	359.87	✕
study group	34	PLM+	20.89	397.64	✕
study group	34	PLM-	21.8	342.5	✕
study group	34	PLM+	23.84	520.87	○
study group	34	PLM+	14.94	342.93	✕
study group	34	PLM+	4.7	418.59	✕
study group	34	PLM+	15.71	436.35	✕
study group	34	PLM-	8.05	382.68	✕
study group	34	PLM+	20.96	402.34	✕
study group	34	PLM+	2.02	478.52	✕
study group	34	PLM+	9.38	563.03	○
study group	34	PLM+	5.16	318.1	✕
study group	34	PLM+	3.63	379.3	✕
study group	34	PLM+	16.38	372.37	✕
study group	34	PLM+	5.73	351.7	✕
study group	34	PLM+	22.25	498.23	○
study group	34	PLM+	28.06	413.8	✕
study group	34	PLM+	6.28	456.52	✕
study group	34	PLM+	9.9	513.71	○
study group	34	PLM+	6.05	492.92	○
study group	34	PLM-	4.59	557.64	○
study group	34	PLM+	10.37	525.56	○
study group	34	PLM-	11.37	403.14	✕
study group	34	PLM+	13.85	317.7	✕
study group	34	PLM+	29.76	388.8	✕
study group	34	PLM+	8.98	453.11	✕
study group	34	PLM-	11.2	342.08	✕
study group	34	PLM+	10.65	403.87	✕
study group	34	PLM+	23.79	577.92	○
study group	34	PLM-	14.38	480.9	○
study group	34	PLM+	17.89	303.98	✕
study group	34	PLM-	21.23	366.79	✕
study group	34	PLM+	18.31	318.61	✕
study group	34	PLM+	22.75	364.85	✕
study group	34	PLM+	19.72	428.78	✕
study group	34	PLM-	8.79	396.48	✕
study group	34	PLM+	13.94	394.58	✕
study group	34	PLM-	8.88	412.3	✕
study group	34	PLM-	15.85	433	✕
study group	34	PLM+	17.3	673.75	○
study group	34	PLM+	14.06	468.59	✕
study group	35	PLM+	23.39	550.99	○
study group	35	PLM+	13.98	455.2	✕
study group	35	PLM+	15.1	541.49	○
study group	35	PLM+	7.11	467.15	✕
study group	35	PLM+	3.68	460.23	✕
study group	35	PLM+	15.03	374.89	✕
study group	35	PLM-	26	253.97	✕
study group	35	PLM+	10.44	400.58	✕
study group	35	PLM+	4.81	427.71	✕
study group	35	PLM+	5.91	448.72	✕
study group	35	PLM-	12.69	400.81	✕
study group	35	PLM+	6.7	345.85	✕
study group	35	PLM-	24.26	478.2	✕
study group	35	PLM+	9	306.42	✕
study group	35	PLM+	14.41	283.83	✕
study group	35	PLM+	17.97	346.11	✕
study group	35	PLM+	3.46	465.27	✕
study group	35	PLM+	4.57	426.77	✕
study group	35	PLM-	21.05	375.25	✕
study group	35	PLM+	8.81	355.87	✕
study group	35	PLM+	12.25	310.31	✕
study group	35	PLM+	8.94	324.38	✕
study group	35	PLM+	8.2	284.57	✕
study group	35	PLM+	2.92	533.55	○
study group	35	PLM+	6.8	331.9	✕
study group	35	PLM+	4.67	489.24	○
study group	35	PLM+	4.63	407.85	✕
study group	35	PLM+	16.71	541.58	○
study group	35	PLM+	9.72	352.52	✕
study group	35	PLM+	2.59	428.72	✕
study group	35	PLM+	10.13	469.82	✕
study group	35	PLM+	28.8	553.39	○
study group	35	PLM+	15.69	338.55	✕
study group	35	PLM+	1.95	376.27	✕
study group	35	PLM+	9.61	379.37	✕
study group	35	PLM+	13.43	462.96	✕
study group	35	PLM+	17.25	308.16	✕
study group	35	PLM+	13.59	447.63	✕
study group	35	PLM+	21.34	449.83	✕
study group	35	PLM+	13.49	511.22	○
study group	35	PLM-	8.45	441.99	✕
study group	35	PLM+	9.84	255.81	✕
study group	35	PLM+	6.39	260.8	✕
study group	35	PLM+	8.63	454.38	✕
study group	35	PLM-	11.39	422.08	✕
study group	35	PLM+	22.74	466.85	✕
study group	35	PLM-	14.63	407.68	✕
study group	35	PLM+	11.9	387.41	✕
study group	35	PLM+	5.55	481.95	○
study group	35	PLM+	17.98	579.85	○
study group	35	PLM+	13.02	378.98	✕
study group	35	PLM+	7	366.75	✕
study group	35	PLM-	4.34	299.85	✕
study group	35	PLM+	12.02	373.58	✕
study group	35	PLM+	10.91	526.31	○
study group	35	PLM+	18.99	353.05	✕
study group	35	PLM+	13.9	412.45	✕
study group	35	PLM+	7.79	506.58	○
study group	35	PLM+	11.07	401.97	✕
study group	35	PLM+	11.63	485.9	○
study group	35	PLM+	16.45	448.87	✕
study group	35	PLM+	10.8	500.24	○
study group	35	PLM-	13.21	528.97	○
study group	35	PLM+	35.03	512.5	○
study group	35	PLM-	18.49	530.18	○
study group	35	PLM+	6.9	416.44	✕
study group	35	PLM-	4.58	482.15	○
study group	35	PLM+	12.19	462.95	✕
study group	35	PLM-	11.62	396.88	✕
study group	35	PLM+	8.71	502.07	○
study group	35	PLM+	18.12	478	✕
study group	35	PLM-	17.87	435.3	✕
study group	35	PLM-	12.65	504.7	○
study group	35	PLM+	13.44	466.88	✕
study group	35	PLM+	5.64	384.65	✕
study group	35	PLM+	5.31	462.14	✕
study group	35	PLM+	19.59	473	✕
study group	35	PLM+	9.07	284.62	✕
study group	35	PLM-	7.67	553.1	○
study group	35	PLM+	23.66	539.62	○
study group	35	PLM+	9.75	509.42	○
study group	35	PLM+	22.2	364.78	✕
study group	35	PLM+	17.03	351.59	✕
study group	35	PLM+	18.22	372.83	✕
study group	35	PLM+	26.17	330.02	✕
study group	35	PLM-	3.85	458.32	✕
study group	35	PLM+	12.64	503.14	○
study group	35	PLM+	8.3	418.6	✕
study group	35	PLM+	14.92	489.48	○
study group	35	PLM+	11.22	325.41	✕
study group	35	PLM+	20.63	375.9	✕
study group	35	PLM+	12.25	468.63	✕
study group	35	PLM-	12.92	478.77	✕
study group	35	PLM+	20.83	465.2	✕
study group	35	PLM+	15.74	380.32	✕
study group	35	PLM+	6.7	405.32	✕
study group	35	PLM-	9.08	380.88	✕
study group	35	PLM+	13.96	407	✕
study group	35	PLM-	11.01	413.76	✕
study group	35	PLM+	16.1	386.91	✕
study group	35	PLM+	12.51	450.28	✕
study group	35	PLM+	16.54	334.55	✕
study group	35	PLM+	18.23	428.58	✕
study group	35	PLM+	14.25	467.07	✕
study group	35	PLM-	25.86	438.4	✕
study group	35	PLM+	20.55	471.6	✕
study group	35	PLM+	28.48	405.65	✕
study group	35	PLM-	12.67	429.08	✕
study group	35	PLM-	14.29	473.81	✕
study group	35	PLM+	9.14	370.45	✕
study group	35	PLM+	10.45	382.39	✕
study group	35	PLM+	16.15	476.76	✕
study group	35	PLM+	9.73	450.81	✕
study group	35	PLM+	4.95	334.08	✕
study group	35	PLM+	17.25	471.58	✕
study group	35	PLM+	4.87	332.7	✕
study group	35	PLM-	12.04	443.35	✕
study group	35	PLM-	18.47	417.39	✕
study group	35	PLM+	7.48	344.27	✕
study group	35	PLM+	9.61	511.72	○
study group	35	PLM+	12.37	413.02	✕
study group	35	PLM+	3.87	538.22	○
study group	35	PLM+	12.01	454.65	✕
study group	35	PLM-	10.91	320.63	✕
study group	35	PLM+	12.25	498.82	○
study group	35	PLM+	19.72	350.61	✕
study group	35	PLM-	9.27	494.9	○
study group	35	PLM-	10.77	371.85	✕
study group	35	PLM+	32.44	343.53	✕
study group	35	PLM-	21.36	400.9	✕
study group	35	PLM+	2.06	370.66	✕
study group	35	PLM+	10.96	407.64	✕
study group	35	PLM-	10.79	324.75	✕
study group	35	PLM+	13.9	463.64	✕
study group	35	PLM+	16.89	293.84	✕
study group	35	PLM+	13.7	413.41	✕
study group	35	PLM-	9.35	405.68	✕
study group	35	PLM-	22.25	401.15	✕
study group	35	PLM+	12.32	542.61	○
study group	35	PLM+	16.94	441.13	✕
study group	35	PLM-	7.38	360.07	✕
study group	35	PLM+	7.85	388.06	✕
study group	35	PLM+	17.5	419.32	✕
study group	35	PLM+	3.3	396.25	✕
study group	35	PLM+	8.54	418.03	✕
study group	35	PLM+	4.5	459.12	✕
study group	35	PLM+	4.52	337.62	✕
study group	35	PLM+	4.49	391.72	✕
study group	35	PLM+	4.39	344.13	✕
study group	35	PLM+	9.27	419.87	✕
study group	35	PLM+	5.21	467.6	✕
study group	35	PLM+	20.97	419.42	✕
study group	35	PLM+	26.45	362.57	✕
study group	35	PLM-	6.45	450.73	✕
study group	35	PLM+	8.93	467.8	✕
study group	35	PLM+	10.43	312.7	✕
study group	35	PLM-	4.98	368.33	✕
study group	35	PLM+	8.7	323.7	✕
study group	35	PLM+	10.64	358.26	✕
study group	35	PLM-	22.25	349.85	✕
study group	35	PLM+	10.26	375.71	✕
study group	35	PLM+	15.13	360.06	✕
study group	35	PLM+	11.55	360.58	✕
study group	35	PLM+	18.06	413.33	✕
study group	35	PLM+	15.55	485.77	○
study group	35	PLM+	12.5	446.7	✕
study group	35	PLM+	17.09	447.76	✕
study group	35	PLM+	18.61	369.13	✕
study group	35	PLM+	21.6	499.91	○
study group	35	PLM+	11.62	343.95	✕
study group	35	PLM+	5.9	465.8	✕
study group	35	PLM+	8.41	400.57	✕
study group	35	PLM+	9.91	356.4	✕
study group	35	PLM+	14.94	405.35	✕
study group	35	PLM+	13.28	433.87	✕
study group	35	PLM+	8.22	513.25	○
study group	35	PLM+	16.17	461.18	✕
study group	35	PLM+	13.28	509.5	○
study group	36	PLM+	18.67	481.2	○
study group	36	PLM+	3.64	524.5	○
study group	36	PLM+	11.46	500.72	○
study group	36	PLM+	9.48	489.51	○
study group	36	PLM+	6.55	548	○
study group	36	PLM+	7.07	438.85	✕
study group	36	PLM+	7.53	434.56	✕
study group	36	PLM+	6.84	367.95	✕
study group	36	PLM-	8.84	411	✕
study group	36	PLM-	17.6	312.64	✕
study group	36	PLM+	9.79	395.14	✕
study group	36	PLM+	27.37	346.19	✕
study group	36	PLM+	7.67	461.2	✕
study group	36	PLM+	6.53	592.1	○
study group	36	PLM+	18.29	404.4	✕
study group	36	PLM+	19	387.67	✕
study group	36	PLM+	4.33	480.7	○
study group	36	PLM+	11.73	277.03	✕
study group	36	PLM+	8.79	295.88	✕
study group	36	PLM+	9.34	299	✕
study group	36	PLM+	4.46	414.85	✕
study group	36	PLM+	3.24	503.85	○
study group	36	PLM+	22.11	449.4	✕
study group	36	PLM-	8.04	364.91	✕
study group	36	PLM+	7.22	401.84	✕
study group	36	PLM+	6.73	402.1	✕
study group	36	PLM+	8.56	292.8	✕
study group	36	PLM+	7.24	421.14	✕
study group	36	PLM+	20.42	453.5	✕
study group	36	PLM-	19.85	461.12	✕
study group	36	PLM+	5.89	350.72	✕
study group	36	PLM+	11.16	451.11	✕
study group	36	PLM-	14.72	390.23	✕
study group	36	PLM+	11.26	424.42	✕
study group	36	PLM+	12.84	377.9	✕
study group	36	PLM+	17.73	434.88	✕
study group	36	PLM+	7.72	323.82	✕
study group	36	PLM+	10.55	516.83	○
study group	36	PLM+	22.18	435	✕
study group	36	PLM+	4.83	407.66	✕
study group	36	PLM-	4.38	456.3	✕
study group	36	PLM+	11.54	460.76	✕
study group	36	PLM+	11.09	447.21	✕
study group	36	PLM+	23.74	550.07	○
study group	36	PLM-	9.61	391.34	✕
study group	36	PLM+	7.86	533.98	○
study group	36	PLM+	3.15	281.39	✕
study group	36	PLM-	6.1	290.25	✕
study group	36	PLM+	12.46	493.7	○
study group	36	PLM-	19.3	353.24	✕
study group	36	PLM-	8.73	454.23	✕
study group	36	PLM+	11.6	407.29	✕
study group	36	PLM+	14.38	335.81	✕
study group	36	PLM+	12.52	387.44	✕
study group	36	PLM+	10.57	410.19	✕
study group	36	PLM+	22.3	390.68	✕
study group	36	PLM+	18.34	474.4	✕
study group	36	PLM+	18.98	421.5	✕
study group	36	PLM+	13.2	435.38	✕
study group	36	PLM+	15.01	358.67	✕
study group	36	PLM+	7.97	400.63	✕
study group	36	PLM+	19.37	523.72	○
study group	36	PLM+	11.44	423.66	✕
study group	36	PLM-	16.2	500.02	○
study group	36	PLM+	6.58	487.53	○
study group	36	PLM-	15.24	438.55	✕
study group	36	PLM+	11.27	455.79	✕
study group	36	PLM+	10.1	395.89	✕
study group	36	PLM+	7.48	462.06	✕
study group	36	PLM+	4.07	390.44	✕
study group	36	PLM+	7.23	410.05	✕
study group	36	PLM+	17.48	389.31	✕
study group	36	PLM+	20.62	376.47	✕
study group	36	PLM-	5.33	465.62	✕
study group	36	PLM+	7.31	402.92	✕
study group	36	PLM+	4.1	349.35	✕
study group	36	PLM+	15.06	347.62	✕
study group	36	PLM+	14.58	407.07	✕
study group	36	PLM+	12.23	306.87	✕
study group	36	PLM+	18.48	388.05	✕
study group	36	PLM+	14.83	383.2	✕
study group	36	PLM+	5.24	478.08	✕
study group	36	PLM+	19.45	446.45	✕
study group	36	PLM-	11.5	399.42	✕
study group	36	PLM+	11.35	390.22	✕
study group	36	PLM+	13.9	446.4	✕
study group	36	PLM+	13.77	409.37	✕
study group	36	PLM+	2.28	450.87	✕
study group	36	PLM+	13.36	433.55	✕
study group	36	PLM-	19.39	501.69	○
study group	36	PLM+	23.44	411.02	✕
study group	36	PLM+	21.98	361.66	✕
study group	36	PLM+	6.76	507.27	○
study group	36	PLM-	8.02	365.77	✕
study group	36	PLM+	11.48	406.73	✕
study group	36	PLM+	3.63	468.42	✕
study group	36	PLM-	8.04	407.87	✕
study group	36	PLM+	7.35	443.32	✕
study group	36	PLM+	13.15	411.24	✕
study group	36	PLM+	9.29	446	✕
study group	36	PLM+	10.23	371.37	✕
study group	36	PLM+	5.06	402.17	✕
study group	36	PLM-	10.06	429.02	✕
study group	36	PLM+	14.73	433.5	✕
study group	36	PLM+	8.22	429.73	✕
study group	36	PLM+	4.99	428.75	✕
study group	36	PLM+	7.93	426.66	✕
study group	36	PLM+	7.54	469.9	✕
study group	36	PLM+	16.94	452.75	✕
study group	36	PLM+	2.37	355.67	✕
study group	36	PLM+	22.13	410.28	✕
study group	36	PLM+	24.61	313.57	✕
study group	36	PLM+	5.85	392.96	✕
study group	36	PLM+	3.84	333.98	✕
study group	36	PLM+	9.52	373.05	✕
study group	36	PLM+	13.36	487.95	○
study group	36	PLM+	16.06	419.82	✕
study group	36	PLM+	2.84	422.29	✕
study group	36	PLM+	3.29	489.1	○
study group	36	PLM+	16.16	418.68	✕
study group	36	PLM-	9.71	525.1	○
study group	36	PLM+	8.59	396.63	✕
study group	36	PLM+	16.02	454.6	✕
study group	36	PLM+	5.09	373.37	✕
study group	36	PLM-	7.01	369.13	✕
study group	36	PLM+	2.63	314.63	✕
study group	36	PLM+	19.86	488.6	○
study group	36	PLM+	3.6	406.88	✕
study group	36	PLM-	19.82	445.7	✕
study group	36	PLM+	20.5	346.05	✕
study group	36	PLM-	7.66	453.65	✕
study group	36	PLM+	3.75	525.71	○
study group	36	PLM+	17.18	448.2	✕
study group	36	PLM-	10.31	287.43	✕
study group	36	PLM-	7.29	351.09	✕
study group	36	PLM-	11.68	303.57	✕
study group	36	PLM-	20.01	360.98	✕
study group	36	PLM+	15.04	405.16	✕
study group	36	PLM+	14.47	410.63	✕
study group	36	PLM-	13.49	420.43	✕
study group	36	PLM+	19.64	326.58	✕
study group	36	PLM+	17.94	492.88	○
study group	36	PLM+	22.56	335.47	✕
study group	36	PLM+	8.46	449.32	✕
study group	36	PLM+	7.44	333.03	✕
study group	36	PLM+	10.79	456.7	✕
study group	36	PLM+	3.18	447.61	✕
study group	36	PLM-	8.67	416.15	✕
study group	36	PLM+	12.53	512.72	○
study group	36	PLM-	13.41	507.33	○
study group	36	PLM+	15.83	510.73	○
study group	36	PLM+	12.43	510.85	○
study group	37	PLM+	6.87	456.4	✕
study group	37	PLM+	26.82	338.72	✕
study group	37	PLM+	9.31	462.6	✕
study group	37	PLM+	3.78	517.6	○
study group	37	PLM+	4.17	415.8	✕
study group	37	PLM+	5.94	376.07	✕
study group	37	PLM+	7.46	297.82	✕
study group	37	PLM+	24.41	365.62	✕
study group	37	PLM+	11	350.01	✕
study group	37	PLM+	6.04	306.38	✕
study group	37	PLM+	9.48	332.49	✕
study group	37	PLM+	7.77	381.53	✕
study group	37	PLM+	20.6	358.65	✕
study group	37	PLM+	18.07	357.83	✕
study group	37	PLM+	5.71	455.48	✕
study group	37	PLM+	4.02	275.51	✕
study group	37	PLM+	9.76	317.64	✕
study group	37	PLM+	5.17	485	○
study group	37	PLM+	5.83	400.14	✕
study group	37	PLM+	6.95	405.33	✕
study group	37	PLM+	4.68	417.96	✕
study group	37	PLM+	16.86	404.88	✕
study group	37	PLM+	26.17	484.15	○
study group	37	PLM-	9.83	323.88	✕
study group	37	PLM+	10.78	418.93	✕
study group	37	PLM+	16.2	446.98	✕
study group	37	PLM+	8.82	406.93	✕
study group	37	PLM+	10.9	470.57	✕
study group	37	PLM-	10.43	351.9	✕
study group	37	PLM+	6.14	345.15	✕
study group	37	PLM+	6.29	490.25	○
study group	37	PLM+	9.6	401.55	✕
study group	37	PLM+	19.1	592.72	○
study group	37	PLM+	10.94	531.48	○
study group	37	PLM-	9.08	431.95	✕
study group	37	PLM+	17.43	440.48	✕
study group	37	PLM+	5.61	492.07	○
study group	37	PLM+	6.07	361.29	✕
study group	37	PLM-	4.47	359.63	✕
study group	37	PLM+	16.13	499.06	○
study group	37	PLM-	16.17	341.1	✕
study group	37	PLM+	8.79	420.63	✕
study group	37	PLM+	9.51	375.15	✕
study group	37	PLM-	17.71	373.95	✕
study group	37	PLM+	11.41	379.85	✕
study group	37	PLM+	7.2	485.78	○
study group	37	PLM+	3	430.25	✕
study group	37	PLM+	18.91	351.58	✕
study group	37	PLM+	16.08	432.61	✕
study group	37	PLM+	9.1	467.2	✕
study group	37	PLM+	2.51	370.18	✕
study group	37	PLM-	20.45	353.17	✕
study group	37	PLM+	8.73	533.32	○
study group	37	PLM+	8.1	421.07	✕
study group	37	PLM+	9.65	408.45	✕
study group	37	PLM+	2.49	319.04	✕
study group	37	PLM+	6.24	420.73	✕
study group	37	PLM-	4.29	442.81	✕
study group	37	PLM+	7.54	545.65	○
study group	37	PLM+	6.06	451.32	✕
study group	37	PLM-	3.13	431.26	✕
study group	37	PLM+	22.97	345.85	✕
study group	37	PLM+	9.51	502.97	○
study group	37	PLM+	15.58	324.76	✕
study group	37	PLM+	4.7	333.1	✕
study group	37	PLM-	14.84	370.6	✕
study group	37	PLM+	13.74	470.16	✕
study group	37	PLM+	11.46	354.6	✕
study group	37	PLM+	14.73	404.95	✕
study group	37	PLM+	18.58	421.63	✕
study group	37	PLM+	6.58	403.33	✕
study group	37	PLM+	21.88	279.12	✕
study group	37	PLM-	17.36	423.75	✕
study group	37	PLM+	15.67	411.12	✕
study group	37	PLM+	25.38	363.55	✕
study group	37	PLM-	6.63	427.19	✕
study group	37	PLM-	9.53	505.72	○
study group	37	PLM-	2.18	382.37	✕
study group	37	PLM+	23.73	427.8	✕
study group	37	PLM-	9.68	429.88	✕
study group	37	PLM+	6.02	340.65	✕
study group	37	PLM+	9.27	508.13	○
study group	37	PLM+	2.31	371.12	✕
study group	37	PLM-	11.03	480.26	○
study group	37	PLM-	8.61	252.59	✕
study group	37	PLM+	8.39	377.24	✕
study group	37	PLM-	3.36	462.47	✕
study group	37	PLM+	4.27	329.9	✕
study group	37	PLM+	10.27	441.47	✕
study group	37	PLM+	7.2	511.24	○
study group	37	PLM+	11.27	480.01	○
study group	37	PLM-	15.68	363.11	✕
study group	37	PLM+	1.24	400.5	✕
study group	37	PLM+	6.67	327.82	✕
study group	37	PLM+	9.38	388.21	✕
study group	37	PLM+	13	502.7	○
study group	37	PLM-	4.4	511.6	○
study group	37	PLM+	17.31	323.58	✕
study group	37	PLM+	6.62	470.77	✕
study group	37	PLM-	10.8	315.22	✕
study group	37	PLM+	12.33	317.46	✕
study group	37	PLM+	3.18	318.5	✕
study group	37	PLM+	4.79	510.32	○
study group	37	PLM+	12.09	359.97	✕
study group	37	PLM-	1.44	344.39	✕
study group	37	PLM+	16.61	347.58	✕
study group	37	PLM+	8.47	409.17	✕
study group	37	PLM+	19.59	404.73	✕
study group	37	PLM+	7	480.77	○
study group	37	PLM-	4.65	485.13	○
study group	37	PLM+	17.32	456.05	✕
study group	37	PLM-	21.7	274.9	✕
study group	37	PLM-	15.83	361	✕
study group	37	PLM-	18.05	371.17	✕
study group	37	PLM+	14.13	407.09	✕
study group	37	PLM+	6.93	353.33	✕
study group	37	PLM+	21.75	353.45	✕
study group	37	PLM+	6.67	274.8	✕
study group	37	PLM+	13.47	513.53	○
study group	37	PLM-	13.51	478.67	✕
study group	37	PLM+	13.31	425.17	✕
study group	37	PLM+	26.92	315.7	✕
study group	37	PLM+	15.43	434.5	✕
study group	37	PLM+	3.7	473.46	✕
study group	37	PLM+	4.37	441.59	✕
study group	37	PLM+	12.48	480.07	○
study group	37	PLM+	5.43	347.08	✕
study group	37	PLM+	21.36	430.63	✕
study group	37	PLM-	13.49	367.05	✕
study group	37	PLM+	13.41	515.3	○
study group	37	PLM+	11.43	469.7	✕
study group	38	PLM+	20.6	447.85	✕
study group	38	PLM+	13.52	341.47	✕
study group	38	PLM+	2.85	569.24	○
study group	38	PLM+	12.45	401.51	✕
study group	38	PLM+	9.31	307.94	✕
study group	38	PLM+	9.23	439.11	✕
study group	38	PLM+	13.94	426.4	✕
study group	38	PLM+	17.51	381.2	✕
study group	38	PLM+	10.65	325.65	✕
study group	38	PLM+	5.19	471.68	✕
study group	38	PLM+	10.15	389.02	✕
study group	38	PLM-	6.65	331.82	✕
study group	38	PLM+	6.56	473.6	✕
study group	38	PLM+	8.14	571.51	○
study group	38	PLM+	9.07	395.98	✕
study group	38	PLM+	15.28	401.5	✕
study group	38	PLM+	22.51	435.36	✕
study group	38	PLM+	11.62	257.5	✕
study group	38	PLM+	8.6	445.86	✕
study group	38	PLM-	18.82	468.53	✕
study group	38	PLM+	4.31	406.73	✕
study group	38	PLM-	7.37	395.83	✕
study group	38	PLM+	16.3	437.26	✕
study group	38	PLM+	6.25	382.37	✕
study group	38	PLM-	15.31	381.95	✕
study group	38	PLM+	18.53	450.75	✕
study group	38	PLM+	7.71	426.4	✕
study group	38	PLM+	11.35	446.58	✕
study group	38	PLM+	9.13	445.46	✕
study group	38	PLM+	1.48	412.07	✕
study group	38	PLM-	10.88	368.35	✕
study group	38	PLM+	4.11	336.32	✕
study group	38	PLM+	10.4	443.22	✕
study group	38	PLM+	13.52	415.15	✕
study group	38	PLM-	9.58	373.15	✕
study group	38	PLM+	11	270.85	✕
study group	38	PLM+	10.89	402.48	✕
study group	38	PLM-	2.06	436.6	✕
study group	38	PLM-	10.34	367.92	✕
study group	38	PLM+	13.66	419.95	✕
study group	38	PLM+	7.32	437.76	✕
study group	38	PLM+	16.16	526.13	○
study group	38	PLM+	4.32	444.03	✕
study group	38	PLM+	7.75	492.98	○
study group	38	PLM+	13.6	537.4	○
study group	38	PLM+	2.47	451.88	✕
study group	38	PLM+	5.87	511.37	○
study group	38	PLM+	9.92	341	✕
study group	38	PLM+	6.73	390.34	✕
study group	38	PLM+	14.43	450.91	✕
study group	38	PLM+	11.87	312.85	✕
study group	38	PLM+	6.91	338.23	✕
study group	38	PLM+	4.26	535.31	○
study group	38	PLM+	7.86	489.82	○
study group	38	PLM+	13.9	532.62	○
study group	38	PLM+	8.3	297.58	✕
study group	38	PLM-	10.4	368.25	✕
study group	38	PLM-	10.67	409.22	✕
study group	38	PLM-	8.4	534.12	○
study group	38	PLM+	9.45	375.9	✕
study group	38	PLM+	7.81	358.28	✕
study group	38	PLM+	6.92	285.86	✕
study group	38	PLM-	9.72	466.4	✕
study group	38	PLM+	14.32	453.4	✕
study group	38	PLM+	6.4	377.12	✕
study group	38	PLM+	4.18	357.27	✕
study group	38	PLM+	20.97	344.53	✕
study group	38	PLM+	14.71	432.7	✕
study group	38	PLM+	7.51	364.44	✕
study group	38	PLM+	11.46	389.57	✕
study group	38	PLM+	13.29	512.38	○
study group	38	PLM-	1.22	549.32	○
study group	38	PLM+	8.11	423.59	✕
study group	38	PLM+	4.48	280.78	✕
study group	38	PLM+	8.81	389.93	✕
study group	38	PLM+	4.48	423.8	✕
study group	38	PLM+	6.92	364.15	✕
study group	38	PLM-	3.13	315.1	✕
study group	38	PLM-	2.99	359.86	✕
study group	38	PLM+	4.59	434.01	✕
study group	38	PLM+	18.1	431.26	✕
study group	38	PLM-	4.12	444	✕
study group	38	PLM-	16.82	460.77	✕
study group	38	PLM+	24.28	363.97	✕
study group	38	PLM+	10.48	378.6	✕
study group	38	PLM-	7.3	324.32	✕
study group	38	PLM+	11.01	407.58	✕
study group	38	PLM+	6.87	389.8	✕
study group	38	PLM+	9.45	395.08	✕
study group	38	PLM+	11.16	380.8	✕
study group	38	PLM+	15.21	337.8	✕
study group	38	PLM+	7.49	531.65	○
study group	38	PLM-	1.69	313.85	✕
study group	38	PLM+	8.61	367.02	✕
study group	38	PLM+	29.73	283.55	✕
study group	38	PLM+	12.22	469.03	✕
study group	39	PLM+	4.54	554.28	○
study group	39	PLM+	12.89	488.75	○
study group	39	PLM+	4.88	305.62	✕
study group	39	PLM+	17.33	314.61	✕
study group	39	PLM+	14.01	393.89	✕
study group	39	PLM-	7.53	359.93	✕
study group	39	PLM+	5.05	448.98	✕
study group	39	PLM+	10.6	399.68	✕
study group	39	PLM+	11.66	361.82	✕
study group	39	PLM-	7.76	461.32	✕
study group	39	PLM+	12.63	361.92	✕
study group	39	PLM+	4.51	406.1	✕
study group	39	PLM+	13.2	425.02	✕
study group	39	PLM+	5.87	350.37	✕
study group	39	PLM+	13.5	518.57	○
study group	39	PLM-	2.12	275.42	✕
study group	39	PLM+	8.51	510.5	○
study group	39	PLM-	11.98	293.47	✕
study group	39	PLM+	9.53	330.77	✕
study group	39	PLM-	5.79	451.99	✕
study group	39	PLM-	6.33	324.25	✕
study group	39	PLM+	6.39	329.68	✕
study group	39	PLM-	1.96	442.92	✕
study group	39	PLM+	2.75	441.75	✕
study group	39	PLM+	2.53	495.97	○
study group	39	PLM+	8.44	455.85	✕
study group	39	PLM+	9.86	400.77	✕
study group	39	PLM+	3.41	283.88	✕
study group	39	PLM+	11.49	323.43	✕
study group	39	PLM-	1.82	524.12	○
study group	39	PLM+	15.93	310.69	✕
study group	39	PLM+	13.03	357.97	✕
study group	39	PLM+	11.87	361.31	✕
study group	39	PLM+	5.09	392.09	✕
study group	39	PLM+	9.86	271.52	✕
study group	39	PLM+	7.23	488.8	○
study group	39	PLM+	7.17	494.8	○
study group	39	PLM+	6.15	338.67	✕
study group	39	PLM+	10.37	386.93	✕
study group	39	PLM+	4.11	344.78	✕
study group	39	PLM+	15.32	496.63	○
study group	39	PLM+	5.2	419.95	✕
study group	39	PLM+	10.57	455.7	✕
study group	39	PLM+	4.09	298.63	✕
study group	39	PLM-	5.86	354.06	✕
study group	39	PLM+	3.45	478.25	✕
study group	39	PLM+	1.16	347.23	✕
study group	39	PLM-	5.58	325.62	✕
study group	39	PLM+	11.81	391.27	✕
study group	39	PLM+	10.43	272.57	✕
study group	39	PLM+	6.53	277.69	✕
study group	39	PLM+	10.48	370.75	✕
study group	39	PLM-	16.15	412.04	✕
study group	39	PLM+	2.79	450.39	✕
study group	39	PLM+	11.55	358.64	✕
study group	39	PLM+	9.55	485.73	○
study group	39	PLM+	19.76	345.22	✕
study group	39	PLM-	8.09	450.49	✕
study group	39	PLM-	13.97	344.6	✕
study group	39	PLM+	8.98	452.92	✕
control group	28	PLM-	19.78	530.67	○
control group	28	PLM-	19.27	380.95	✕
control group	28	PLM-	15.51	405.4	✕
control group	28	PLM-	16.9	359	✕
control group	28	PLM-	21.89	456.15	✕
control group	28	PLM-	18.53	361.73	✕
control group	28	PLM-	24.29	336.52	✕
control group	28	PLM-	13.85	462.03	✕
control group	28	PLM-	9.89	380.45	✕
control group	28	PLM-	8.03	456.59	✕
control group	28	PLM-	12.03	368.8	✕
control group	28	PLM-	16.16	373.01	✕
control group	28	PLM-	14.65	552.72	○
control group	28	PLM-	30.71	382.3	✕
control group	28	PLM-	15.71	335.32	✕
control group	28	PLM-	27.29	490.11	○
control group	28	PLM-	24.34	387.8	✕
control group	28	PLM-	17.75	361.43	✕
control group	28	PLM-	11.98	391.3	✕
control group	28	PLM-	5.64	549.33	○
control group	28	PLM-	33.62	329.85	✕
control group	28	PLM-	14.83	493.88	○
control group	28	PLM-	24.93	361.32	✕
control group	28	PLM-	43.83	430.65	✕
control group	28	PLM-	17	348.03	✕
control group	28	PLM-	13.65	478.67	✕
control group	28	PLM-	22.24	495.73	○
control group	28	PLM-	21.61	458.22	✕
control group	29	PLM-	11.93	415.8	✕
control group	29	PLM-	24.33	367.97	✕
control group	29	PLM-	9.35	390.03	✕
control group	29	PLM-	12.76	329.44	✕
control group	29	PLM-	29.07	349.3	✕
control group	29	PLM-	16.17	355.52	✕
control group	29	PLM-	11.41	306.69	✕
control group	29	PLM-	18.14	469.85	✕
control group	29	PLM-	29.81	382.83	✕
control group	29	PLM-	2.96	462.15	✕
control group	29	PLM-	17.81	367.87	✕
control group	29	PLM-	15.03	303.45	✕
control group	29	PLM-	6.69	337.46	✕
control group	29	PLM-	12.8	296.6	✕
control group	29	PLM-	9.5	406.11	✕
control group	29	PLM-	26.7	477.39	✕
control group	29	PLM-	23.57	279.88	✕
control group	29	PLM-	16.19	444.65	✕
control group	29	PLM-	20.93	279.75	✕
control group	29	PLM-	17.58	338.28	✕
control group	29	PLM-	17.23	407.65	✕
control group	29	PLM-	28.64	376.29	✕
control group	29	PLM-	14.72	469.03	✕
control group	29	PLM-	8.1	391.12	✕
control group	29	PLM-	21.03	381.03	✕
control group	29	PLM-	28.26	309.7	✕
control group	29	PLM-	14.3	408	✕
control group	29	PLM-	14.75	401.12	✕
control group	29	PLM-	19.47	374.8	✕
control group	29	PLM-	15.89	456.3	✕
control group	29	PLM-	29.23	434.38	✕
control group	29	PLM-	10.51	412.55	✕
control group	29	PLM-	29.46	362.7	✕
control group	29	PLM-	17.37	499.76	○
control group	29	PLM-	34.93	322.8	✕
control group	29	PLM-	41.55	377.55	✕
control group	29	PLM-	13.1	456.68	✕
control group	29	PLM-	22.88	496.05	○
control group	29	PLM-	19.32	501.01	○
control group	29	PLM-	28.89	424.05	✕
control group	29	PLM-	20.5	413.77	✕
control group	29	PLM-	10.25	483.08	○
control group	30	PLM-	26.7	480.84	○
control group	30	PLM-	15.59	345.32	✕
control group	30	PLM-	18.88	337.05	✕
control group	30	PLM-	18.92	370.25	✕
control group	30	PLM-	19.11	431.18	✕
control group	30	PLM-	15.65	425.12	✕
control group	30	PLM-	17.87	425.42	✕
control group	30	PLM-	11.49	428.59	✕
control group	30	PLM-	12.5	346.7	✕
control group	30	PLM-	23.25	300.14	✕
control group	30	PLM-	11.95	442.23	✕
control group	30	PLM-	22.73	324.95	✕
control group	30	PLM-	22.02	383.76	✕
control group	30	PLM-	13.92	362.9	✕
control group	30	PLM-	28.88	368.54	✕
control group	30	PLM-	11.72	396.65	✕
control group	30	PLM-	15.74	359.9	✕
control group	30	PLM-	18.96	491.38	○
control group	30	PLM-	12.28	396.7	✕
control group	30	PLM-	32.63	334.78	✕
control group	30	PLM-	7.41	288.12	✕
control group	30	PLM-	28.42	436.92	✕
control group	30	PLM-	9.91	479.54	✕
control group	30	PLM-	4.6	266.36	✕
control group	30	PLM-	30.73	369.7	✕
control group	30	PLM-	26.42	284.53	✕
control group	30	PLM-	15.06	403.5	✕
control group	30	PLM-	31.08	333.55	✕
control group	30	PLM-	20.21	325.83	✕
control group	30	PLM-	9.7	325.19	✕
control group	30	PLM-	22.98	359.92	✕
control group	30	PLM-	23.76	483.37	○
control group	30	PLM-	40.55	247.12	✕
control group	30	PLM-	11.04	486.69	○
control group	30	PLM-	8.03	458.77	✕
control group	30	PLM-	20.29	304.13	✕
control group	30	PLM-	19.05	409.59	✕
control group	30	PLM-	21.29	324.2	✕
control group	30	PLM-	6.24	370.87	✕
control group	30	PLM-	10.39	497.37	○
control group	30	PLM-	32.68	383.91	✕
control group	30	PLM-	14.82	391.64	✕
control group	30	PLM-	13.48	452.6	✕
control group	30	PLM-	24.45	400.9	✕
control group	30	PLM-	14.11	406.22	✕
control group	30	PLM-	27.87	439.59	✕
control group	30	PLM-	9.08	421.55	✕
control group	31	PLM-	17.96	504.05	○
control group	31	PLM-	8.53	355.1	✕
control group	31	PLM-	11.59	366.61	✕
control group	31	PLM-	25.69	313.45	✕
control group	31	PLM-	16.14	329.05	✕
control group	31	PLM-	22.72	490.33	○
control group	31	PLM-	28.12	421.05	✕
control group	31	PLM-	3.14	475.27	✕
control group	31	PLM-	11.73	425.97	✕
control group	31	PLM-	11.23	414.6	✕
control group	31	PLM-	10.13	288.32	✕
control group	31	PLM-	21.94	464.85	✕
control group	31	PLM-	15.14	404.65	✕
control group	31	PLM-	9.27	449.41	✕
control group	31	PLM-	21.11	296.95	✕
control group	31	PLM-	5.55	382.83	✕
control group	31	PLM-	19.35	358.27	✕
control group	31	PLM-	27.78	470.22	✕
control group	31	PLM-	25.21	454.67	✕
control group	31	PLM-	11.83	468.54	✕
control group	31	PLM-	6.65	408.63	✕
control group	31	PLM-	19.43	379.01	✕
control group	31	PLM-	21.23	540.85	○
control group	31	PLM-	27.85	424.35	✕
control group	31	PLM-	39.52	396.68	✕
control group	31	PLM-	5.12	440.63	✕
control group	31	PLM-	21.54	469.64	✕
control group	31	PLM-	8.09	418.02	✕
control group	31	PLM-	22.9	360.83	✕
control group	31	PLM-	27.32	363.07	✕
control group	31	PLM-	18.63	352.08	✕
control group	31	PLM-	23.47	395.55	✕
control group	31	PLM-	10.48	432.14	✕
control group	31	PLM-	34.91	362.75	✕
control group	31	PLM-	27.91	386.48	✕
control group	31	PLM-	10.29	287.05	✕
control group	31	PLM-	10.23	341.11	✕
control group	31	PLM-	29.85	501.46	○
control group	31	PLM-	20.45	376.07	✕
control group	31	PLM-	20.61	396.22	✕
control group	31	PLM-	15.47	349.57	✕
control group	31	PLM-	25.4	419.43	✕
control group	32	PLM-	25.84	576	○
control group	32	PLM-	19.79	499.48	○
control group	32	PLM-	13.6	387.22	✕
control group	32	PLM-	19.84	403.28	✕
control group	32	PLM-	10.01	419.48	✕
control group	32	PLM-	10.82	487.62	○
control group	32	PLM-	25.86	361.98	✕
control group	32	PLM-	25.99	398.55	✕
control group	32	PLM-	24.54	335.78	✕
control group	32	PLM-	14.19	390.7	✕
control group	32	PLM-	15.29	457.96	✕
control group	32	PLM-	29.51	541.08	○
control group	32	PLM-	16.17	461.98	✕
control group	32	PLM-	5.15	395.18	✕
control group	32	PLM-	15.11	465.89	✕
control group	32	PLM-	19.55	413.33	✕
control group	32	PLM-	7.42	372.65	✕
control group	32	PLM-	19.75	385.54	✕
control group	32	PLM-	8	473.16	✕
control group	32	PLM-	7.3	415.64	✕
control group	32	PLM-	7.2	390.52	✕
control group	32	PLM-	16.91	431.43	✕
control group	32	PLM-	19.92	520.37	○
control group	32	PLM-	24.8	382.02	✕
control group	32	PLM-	10.8	440.53	✕
control group	32	PLM-	24.52	451.15	✕
control group	32	PLM-	27.01	360.4	✕
control group	32	PLM-	8.83	518.61	○
control group	32	PLM-	16.4	440.64	✕
control group	32	PLM-	21.91	519.67	○
control group	32	PLM-	26.2	423.66	✕
control group	32	PLM-	19.23	425.57	✕
control group	32	PLM-	14.87	374.45	✕
control group	32	PLM-	27.46	392	✕
control group	32	PLM-	25.6	610.98	○
control group	32	PLM-	21.75	417.9	✕
control group	32	PLM-	6.56	478.77	✕
control group	32	PLM-	8.83	519.27	○
control group	32	PLM-	21.25	385.52	✕
control group	32	PLM-	21.99	350.32	✕
control group	32	PLM-	15.16	399.25	✕
control group	32	PLM-	14.2	291.09	✕
control group	32	PLM-	26.63	306.65	✕
control group	32	PLM-	30.87	382.85	✕
control group	32	PLM-	23.93	531.55	○
control group	32	PLM-	18.54	400.15	✕
control group	32	PLM-	20.32	333.44	✕
control group	32	PLM-	22.15	322	✕
control group	32	PLM-	5.67	401.58	✕
control group	33	PLM-	17.7	428.5	✕
control group	33	PLM-	14.83	508.76	○
control group	33	PLM-	18.47	428.16	✕
control group	33	PLM-	11.03	367.18	✕
control group	33	PLM-	17.86	346.4	✕
control group	33	PLM-	10.11	433.73	✕
control group	33	PLM-	20.23	388.06	✕
control group	33	PLM-	22.57	339.35	✕
control group	33	PLM-	22.12	344.53	✕
control group	33	PLM-	6.81	455.14	✕
control group	33	PLM-	16.16	380.66	✕
control group	33	PLM-	32.51	439.46	✕
control group	33	PLM-	13.97	444.42	✕
control group	33	PLM-	27.5	523.83	○
control group	33	PLM-	16.7	514.03	○
control group	33	PLM-	10.12	486.18	○
control group	33	PLM-	7.04	356.35	✕
control group	33	PLM-	18.24	331.82	✕
control group	33	PLM-	7.29	372.66	✕
control group	33	PLM-	19.23	412.22	✕
control group	33	PLM-	6.78	376.1	✕
control group	33	PLM-	8.8	454.4	✕
control group	33	PLM-	17.76	413.13	✕
control group	33	PLM-	8.91	481	○
control group	33	PLM-	19.07	451.98	✕
control group	33	PLM-	11.55	428.61	✕
control group	33	PLM-	13	431.41	✕
control group	33	PLM-	6.4	270.76	✕
control group	33	PLM-	18.29	390.01	✕
control group	33	PLM-	30.59	406.15	✕
control group	33	PLM-	13.66	436.79	✕
control group	33	PLM-	21.41	268.42	✕
control group	33	PLM-	8.3	326.88	✕
control group	33	PLM-	11.83	277.1	✕
control group	33	PLM-	16.11	523.43	○
control group	33	PLM-	13.2	386.35	✕
control group	33	PLM-	26.87	395	✕
control group	33	PLM-	15.05	404.15	✕
control group	33	PLM-	21.45	459.08	✕
control group	33	PLM-	12.66	441.77	✕
control group	33	PLM-	20.04	543.52	○
control group	33	PLM-	9.35	315.6	✕
control group	33	PLM-	16.67	383.05	✕
control group	33	PLM-	26.26	326.9	✕
control group	33	PLM-	13.29	481.06	○
control group	33	PLM-	22.01	299.37	✕
control group	33	PLM-	23.23	339.37	✕
control group	33	PLM-	8.45	293.37	✕
control group	33	PLM-	15.93	431.05	✕
control group	33	PLM-	7.39	425.75	✕
control group	33	PLM-	12.2	279.99	✕
control group	33	PLM-	15.89	304.29	✕
control group	34	PLM-	25.93	322.92	✕
control group	34	PLM-	22.11	324.18	✕
control group	34	PLM-	10.78	438.8	✕
control group	34	PLM-	22.41	522.22	○
control group	34	PLM-	8.67	356.98	✕
control group	34	PLM-	20.36	399.5	✕
control group	34	PLM-	8.26	373.91	✕
control group	34	PLM-	10.04	405.12	✕
control group	34	PLM-	23.28	326	✕
control group	34	PLM-	15.43	336.78	✕
control group	34	PLM-	7.49	543.67	○
control group	34	PLM-	15.69	349.55	✕
control group	34	PLM-	26.12	523.77	○
control group	34	PLM-	9.55	444.56	✕
control group	34	PLM-	11.36	348.45	✕
control group	34	PLM-	18.92	436.9	✕
control group	34	PLM-	11.73	261.63	✕
control group	34	PLM-	10.15	451.53	✕
control group	34	PLM-	11.05	404.39	✕
control group	34	PLM-	9.65	444.17	✕
control group	34	PLM-	25.03	367.6	✕
control group	34	PLM-	7.08	419.05	✕
control group	34	PLM-	18.78	364.55	✕
control group	34	PLM-	4.45	321.15	✕
control group	34	PLM-	6.04	350.03	✕
control group	34	PLM-	14.32	431.25	✕
control group	34	PLM-	18	456.77	✕
control group	34	PLM-	26.02	479.7	✕
control group	34	PLM-	12.72	428.05	✕
control group	34	PLM-	6.38	450.38	✕
control group	34	PLM-	17.83	383.83	✕
control group	34	PLM-	13.87	398.08	✕
control group	34	PLM-	11.43	449.4	✕
control group	34	PLM-	19.28	416.45	✕
control group	34	PLM-	17.01	360.07	✕
control group	34	PLM-	36	404.67	✕
control group	34	PLM-	12.33	487	○
control group	34	PLM-	23.03	484.76	○
control group	34	PLM-	23.24	383.69	✕
control group	34	PLM-	11.85	410.9	✕
control group	34	PLM-	19.63	372.01	✕
control group	34	PLM-	22.25	382.15	✕
control group	34	PLM-	12.91	485.36	○
control group	34	PLM-	25.72	356.33	✕
control group	34	PLM-	17.7	443	✕
control group	34	PLM-	20.02	475.6	✕
control group	34	PLM-	14.65	279.94	✕
control group	34	PLM-	4.93	395.33	✕
control group	35	PLM-	4.46	428.88	✕
control group	35	PLM-	6.87	567.88	○
control group	35	PLM-	6.33	537.65	○
control group	35	PLM-	23.37	359.4	✕
control group	35	PLM-	18.27	495.2	○
control group	35	PLM-	7.76	369.06	✕
control group	35	PLM-	10.71	392	✕
[truncated: 181 more rows]

## Sheet: 3period
week28-31	PLM28-31	week32-35	PLM32-35	week36-39	PLM36-39
28-31	PLM+	32-35	PLM+	36-39	PLMー
28-31	PLMー	32-35	PLMー	36-39	PLM+
28-31	PLM+	32-35	PLM+	36-39	PLM+
28-31	PLM+	32-35	PLMー	36-39	PLMー
28-31	PLMー	32-35	PLMー	36-39	PLM+
28-31	PLM+	32-35	PLMー	36-39	PLM+
28-31	PLM+	32-35	PLMー	36-39	PLMー
28-31	PLMー	32-35	PLM+	36-39	PLM+
28-31	PLMー	32-35	PLMー	36-39	PLMー
28-31	PLMー	32-35	PLM+	36-39	PLM+
28-31	PLMー	32-35	PLMー	36-39	PLM+
28-31	PLMー	32-35	PLMー	36-39	PLM+
28-31	PLMー	32-35	PLM+	36-39	PLMー
28-31	PLM+	32-35	PLM+	36-39	PLMー
28-31	PLM+	32-35	PLMー	36-39	PLMー
28-31	PLM+	32-35	PLM+	36-39	PLMー
28-31	PLM+	32-35	PLMー	36-39	PLM+
28-31	PLM+	32-35	PLMー	36-39	PLMー
28-31	PLM+	32-35	PLMー	36-39	PLM+
28-31	PLM+	32-35	PLM+	36-39	PLMー
28-31	PLM+	32-35	PLM+	36-39	PLMー
28-31	PLM+	32-35	PLM+	36-39	PLM+
28-31	PLM+	32-35	PLM+	36-39	PLM+
28-31	PLM+	32-35	PLM+	36-39	PLM+
28-31	PLM+	32-35	PLM+	36-39	PLM+
28-31	PLM+	32-35	PLM+	36-39	PLM+
28-31	PLM+	32-35	PLM+	36-39	PLM+
28-31	PLM+	32-35	PLM+	36-39	PLM+
28-31	PLM+	32-35	PLM+	36-39	PLM+
28-31	PLM+	32-35	PLM+	36-39	PLM+
28-31	PLM+	32-35	PLMー	36-39	PLMー
28-31	PLMー	32-35	PLMー	36-39	PLM+
28-31	PLM+	32-35	PLM+	36-39	PLM+
28-31	PLMー	32-35	PLM+	36-39	PLMー
28-31	PLM+	32-35	PLM+	36-39	PLM+
28-31	PLMー	32-35	PLMー	36-39	PLMー
28-31	PLM+	32-35	PLM+	36-39	PLM+
28-31	PLMー	32-35	PLM+	36-39	PLM+
28-31	PLM+	32-35	PLM+	36-39	PLMー
28-31	PLMー	32-35	PLMー	36-39	PLM+
28-31	PLM+	32-35	PLM+	36-39	PLM+
28-31	PLMー	32-35	PLM+	36-39	PLMー
28-31	PLM+	32-35	PLM+	36-39	PLM+
28-31	PLM+	32-35	PLMー	36-39	PLM+
28-31	PLMー	32-35	PLM+	36-39	PLMー
28-31	PLMー	32-35	PLM+	36-39	PLM+
28-31	PLM+	32-35	PLM+	36-39	PLM+
28-31	PLM+	32-35	PLM+	36-39	PLM+
28-31	PLM+	32-35	PLMー	36-39	PLM+
28-31	PLMー	32-35	PLMー	36-39	PLM+
28-31	PLMー	32-35	PLM+	36-39	PLMー
28-31	PLMー	32-35	PLMー	36-39	PLMー
28-31	PLM+	32-35	PLM+	36-39	PLM+
28-31	PLM+	32-35	PLM+	36-39	PLM+
28-31	PLMー	32-35	PLMー	36-39	PLMー
28-31	PLM+	32-35	PLMー	36-39	PLMー
28-31	PLM+	32-35	PLM+	36-39	PLMー
28-31	PLM+	32-35	PLM+	36-39	PLM+
28-31	PLMー	32-35	PLM+	36-39	PLM+
28-31	PLMー	32-35	PLM+	36-39	PLM+
28-31	PLM+	32-35	PLMー	36-39	PLMー
28-31	PLMー	32-35	PLMー	36-39	PLM+
28-31	PLMー	32-35	PLM+	36-39	PLM+
28-31	PLM+	32-35	PLM+	36-39	PLMー
28-31	PLMー	32-35	PLMー	36-39	PLMー
28-31	PLMー	32-35	PLM+	36-39	PLMー
28-31	PLM+	32-35	PLM+	36-39	PLM+
28-31	PLM+	32-35	PLMー	36-39	PLMー
28-31	PLM+	32-35	PLMー	36-39	PLMー
28-31	PLMー	32-35	PLM+	36-39	PLMー
28-31	PLM+	32-35	PLMー	36-39	PLM+
28-31	PLM+	32-35	PLMー	36-39	PLM+
28-31	PLM+	32-35	PLM+	36-39	PLM+
28-31	PLM+	32-35	PLM+	36-39	PLMー
28-31	PLM+	32-35	PLMー	36-39	PLM+
28-31	PLMー	32-35	PLMー	36-39	PLMー
28-31	PLM+	32-35	PLM+	36-39	PLMー
28-31	PLM+	32-35	PLMー	36-39	PLM+
28-31	PLM+	32-35	PLMー	36-39	PLM+
28-31	PLM+	32-35	PLMー	36-39	PLMー
28-31	PLMー	32-35	PLMー	36-39	PLM+
28-31	PLM+	32-35	PLMー	36-39	PLM+
28-31	PLM+	32-35	PLMー	36-39	PLMー
28-31	PLM+	32-35	PLMー	36-39	PLMー
28-31	PLMー	32-35	PLMー	36-39	PLMー
28-31	PLM+	32-35	PLMー	36-39	PLMー
28-31	PLM+	32-35	PLMー	36-39	PLMー
28-31	PLMー	32-35	PLMー	36-39	PLMー
28-31	PLM+	32-35	PLM+	36-39	PLMー
28-31	PLMー	32-35	PLMー	36-39	PLM+
28-31	PLMー	32-35	PLMー	36-39	PLMー
28-31	PLMー	32-35	PLM+	36-39	PLMー
28-31	PLM+	32-35	PLM+	36-39	PLM+
28-31	PLMー	32-35	PLMー	36-39	PLM+
28-31	PLM+	32-35	PLM+	36-39	PLM+
28-31	PLM+	32-35	PLM+	36-39	PLMー
28-31	PLM+	32-35	PLM+	36-39	PLM+
28-31	PLMー	32-35	PLM+	36-39	PLMー
28-31	PLM+	32-35	PLMー	36-39	PLM+
28-31	PLM+	32-35	PLMー	36-39	PLM+
28-31	PLM+	32-35	PLM+	36-39	PLMー
28-31	PLM+	32-35	PLMー	36-39	PLMー
28-31	PLMー	32-35	PLM+	36-39	PLM+
28-31	PLM+	32-35	PLM+	36-39	PLM+
28-31	PLMー	32-35	PLM+	36-39	PLMー
28-31	PLM+	32-35	PLM+	36-39	PLM+
28-31	PLM+	32-35	PLMー	36-39	PLM+
28-31	PLM+	32-35	PLMー	36-39	PLM+
28-31	PLM+	32-35	PLM+	36-39	PLMー
28-31	PLM+	32-35	PLMー	36-39	PLMー
28-31	PLM+	32-35	PLMー	36-39	PLM+
28-31	PLM+	32-35	PLMー	36-39	PLM+
28-31	PLM+	32-35	PLMー	36-39	PLM+
28-31	PLM+	32-35	PLM+	36-39	PLM+
28-31	PLM+	32-35	PLM+	36-39	PLM+
28-31	PLM+	32-35	PLMー	36-39	PLM+
28-31	PLMー	32-35	PLM+	36-39	PLM+
28-31	PLMー	32-35	PLM+	36-39	PLM+
28-31	PLMー	32-35	PLMー	36-39	PLMー
28-31	PLM+	32-35	PLM+	36-39	PLM+
28-31	PLMー	32-35	PLM+	36-39	PLMー
28-31	PLM+	32-35	PLM+	36-39	PLM+
28-31	PLMー	32-35	PLM+	36-39	PLM+
28-31	PLMー	32-35	PLM+	36-39	PLM+
28-31	PLM+	32-35	PLM+	36-39	PLM+
28-31	PLM+	32-35	PLM+	36-39	PLMー
28-31	PLM+	32-35	PLMー	36-39	PLM+
28-31	PLMー	32-35	PLM+	36-39	PLMー
28-31	PLMー	32-35	PLMー	36-39	PLMー
28-31	PLMー	32-35	PLMー	36-39	PLM+
28-31	PLM+	32-35	PLMー	36-39	PLM+
28-31	PLM+	32-35	PLM+	36-39	PLM+
28-31	PLMー	32-35	PLMー	36-39	PLMー
28-31	PLMー	32-35	PLMー	36-39	PLMー
28-31	PLMー	32-35	PLMー	36-39	PLM+
28-31	PLMー	32-35	PLMー	36-39	PLM+
28-31	PLM+	32-35	PLM+	36-39	PLMー
28-31	PLMー	32-35	PLM+	36-39	PLM+
28-31	PLMー	32-35	PLM+	36-39	PLM+
28-31	PLMー	32-35	PLM+	36-39	PLM+
28-31	PLMー	32-35	PLM+	36-39	PLM+
28-31	PLM+	32-35	PLMー	36-39	PLM+
28-31	PLMー	32-35	PLM+	36-39	PLMー
28-31	PLMー	32-35	PLM+	36-39	PLM+
28-31	PLM+	32-35	PLM+	36-39	PLM+
28-31	PLM+	32-35	PLMー	36-39	PLM+
28-31	PLM+	32-35	PLM+	36-39	PLM+
28-31	PLM+	32-35	PLMー	36-39	PLM+
28-31	PLM+	32-35	PLM+	36-39	PLM+
28-31	PLMー	32-35	PLM+	36-39	PLM+
28-31	PLMー	32-35	PLMー	36-39	PLM+
28-31	PLM+	32-35	PLM+	36-39	PLM+
28-31	PLM+	32-35	PLM+	36-39	PLM+
28-31	PLMー	32-35	PLM+	36-39	PLM+
28-31	PLMー	32-35	PLMー	36-39	PLM+
28-31	PLM+	32-35	PLM+	36-39	PLM+
28-31	PLMー	32-35	PLM+	36-39	PLM+
28-31	PLMー	32-35	PLM+	36-39	PLM+
28-31	PLM+	32-35	PLM+	36-39	PLMー
28-31	PLMー	32-35	PLMー	36-39	PLM+
28-31	PLM+	32-35	PLM+	36-39	PLM+
28-31	PLM+	32-35	PLM+	36-39	PLMー
28-31	PLM+	32-35	PLM+	36-39	PLM+
28-31	PLM+	32-35	PLMー	36-39	PLM+
28-31	PLM+	32-35	PLM+	36-39	PLMー
28-31	PLM+	32-35	PLMー	36-39	PLM+
28-31	PLMー	32-35	PLM+	36-39	PLMー
28-31	PLM+	32-35	PLM+	36-39	PLMー
28-31	PLM+	32-35	PLMー	36-39	PLM+
28-31	PLM+	32-35	PLM+	36-39	PLM+
28-31	PLM+	32-35	PLMー	36-39	PLM+
28-31	PLM+	32-35	PLMー	36-39	PLMー
28-31	PLMー	32-35	PLM+	36-39	PLM+
28-31	PLMー	32-35	PLM+	36-39	PLMー
28-31	PLMー	32-35	PLMー	36-39	PLM+
28-31	PLM+	32-35	PLMー	36-39	PLMー
28-31	PLM+	32-35	PLM+	36-39	PLM+
28-31	PLMー	32-35	PLM+	36-39	PLMー
28-31	PLMー	32-35	PLMー	36-39	PLMー
28-31	PLMー	32-35	PLM+	36-39	PLMー
28-31	PLM+	32-35	PLM+	36-39	PLMー
28-31	PLM+	32-35	PLM+	36-39	PLMー
28-31	PLMー	32-35	PLMー	36-39	PLMー
28-31	PLMー	32-35	PLM+	36-39	PLMー
28-31	PLM+	32-35	PLMー	36-39	PLMー
28-31	PLM+	32-35	PLMー	36-39	PLM+
28-31	PLM+	32-35	PLM+	36-39	PLMー
28-31	PLMー	32-35	PLMー	36-39	PLMー
28-31	PLM+	32-35	PLMー	36-39	PLMー
28-31	PLM+	32-35	PLMー	36-39	PLM+
28-31	PLM+	32-35	PLMー	36-39	PLMー
28-31	PLMー	32-35	PLMー	36-39	PLM+
28-31	PLMー	32-35	PLMー	36-39	PLM+
28-31	PLMー	32-35	PLM+	36-39	PLM+
28-31	PLM+	32-35	PLM+	36-39	PLMー
28-31	PLMー	32-35	PLMー	36-39	PLM+
28-31	PLM+	32-35	PLMー	36-39	PLM+
28-31	PLMー	32-35	PLM+	36-39	PLM+
28-31	PLMー	32-35	PLM+	36-39	PLM+
28-31	PLMー	32-35	PLMー	36-39	PLMー
28-31	PLM+	32-35	PLMー	36-39	PLM+
28-31	PLM+	32-35	PLMー	36-39	PLMー
28-31	PLM+	32-35	PLM+	36-39	PLM+
28-31	PLMー	32-35	PLM+	36-39	PLM+
28-31	PLM+	32-35	PLM+	36-39	PLM+
28-31	PLMー	32-35	PLMー	36-39	PLM+
28-31	PLMー	32-35	PLM+	36-39	PLM+
28-31	PLMー	32-35	PLM+	36-39	PLM+
28-31	PLMー	32-35	PLMー	36-39	PLMー
28-31	PLMー	32-35	PLM+	36-39	PLM+
28-31	PLM+	32-35	PLMー	36-39	PLMー
28-31	PLMー	32-35	PLMー	36-39	PLM+
28-31	PLM+	32-35	PLM+	36-39	PLMー
28-31	PLMー	32-35	PLM+	36-39	PLM+
28-31	PLMー	32-35	PLM+	36-39	PLMー
28-31	PLM+	32-35	PLMー	36-39	PLM+
28-31	PLM+	32-35	PLM+	36-39	PLMー
28-31	PLMー	32-35	PLM+	36-39	PLM+
28-31	PLMー	32-35	PLM+	36-39	PLMー
28-31	PLM+	32-35	PLMー	36-39	PLM+
28-31	PLMー	32-35	PLM+	36-39	PLM+
28-31	PLM+	32-35	PLM+	36-39	PLMー
28-31	PLM+	32-35	PLMー	36-39	PLMー
28-31	PLMー	32-35	PLM+	36-39	PLM+
28-31	PLM+	32-35	PLM+	36-39	PLM+
28-31	PLM+	32-35	PLMー	36-39	PLM+
28-31	PLM+	32-35	PLMー	36-39	PLM+
28-31	PLM+	32-35	PLMー	36-39	PLM+
28-31	PLM+	32-35	PLMー	36-39	PLM+
28-31	PLM+	32-35	PLM+	36-39	PLM+
28-31	PLMー	32-35	PLM+	36-39	PLM+
28-31	PLM+	32-35	PLMー	36-39	PLM+
28-31	PLM+	32-35	PLM+	36-39	PLM+
28-31	PLM+	32-35	PLM+	36-39	PLMー
28-31	PLM+	32-35	PLMー	36-39	PLM+
28-31	PLMー	32-35	PLMー	36-39	PLM+
28-31	PLM+	32-35	PLM+	36-39	PLMー
28-31	PLMー	32-35	PLM+	36-39	PLM+
28-31	PLM+	32-35	PLM+	36-39	PLM+
28-31	PLMー	32-35	PLMー	36-39	PLM+
28-31	PLM+	32-35	PLM+	36-39	PLM+
28-31	PLM+	32-35	PLM+	36-39	PLMー
28-31	PLMー	32-35	PLM+	36-39	PLMー
28-31	PLM+	32-35	PLM+	36-39	PLMー
28-31	PLMー	32-35	PLM+	36-39	PLM+
28-31	PLM+	32-35	PLM+	36-39	PLM+
28-31	PLM+	32-35	PLM+	36-39	PLM+
28-31	PLMー	32-35	PLMー	36-39	PLM+
28-31	PLM+	32-35	PLM+	36-39	PLM+
28-31	PLM+	32-35	PLMー	36-39	PLMー
28-31	PLMー	32-35	PLM+	36-39	PLM+
28-31	PLM+	32-35	PLMー	36-39	PLM+
28-31	PLM+	32-35	PLM+	36-39	PLM+
28-31	PLM+	32-35	PLM+	36-39	PLMー
28-31	PLM+	32-35	PLMー	36-39	PLMー
28-31	PLM+	32-35	PLM+	36-39	PLMー
28-31	PLM+	32-35	PLMー	36-39	PLM+
28-31	PLMー	32-35	PLM+	36-39	PLMー
28-31	PLMー	32-35	PLM+	36-39	PLM+
28-31	PLMー	32-35	PLM+	36-39	PLMー
28-31	PLM+	32-35	PLMー	36-39	PLM+
28-31	PLM+	32-35	PLM+	36-39	PLMー
28-31	PLM+	32-35	PLMー	36-39	PLM+
28-31	PLM+	32-35	PLMー	36-39	PLMー
28-31	PLM+	32-35	PLMー	36-39	PLM+
28-31	PLM+	32-35	PLM+	36-39	PLMー
28-31	PLM+	32-35	PLM+	36-39	PLMー
28-31	PLM+	32-35	PLM+	36-39	PLM+
28-31	PLMー	32-35	PLM+	36-39	PLMー
28-31	PLM+	32-35	PLMー	36-39	PLM+
28-31	PLMー	32-35	PLM+	36-39	PLM+
28-31	PLM+	32-35	PLM+	36-39	PLMー
28-31	PLM+	32-35	PLM+	36-39	PLMー
28-31	PLM+	32-35	PLM+	36-39	PLMー
28-31	PLM+	32-35	PLMー	36-39	PLMー
28-31	PLM+	32-35	PLM+	36-39	PLMー
28-31	PLM+	32-35	PLM+	36-39	PLM+
28-31	PLM+	32-35	PLM+	36-39	PLMー
28-31	PLMー	32-35	PLMー	36-39	PLM+
28-31	PLM+	32-35	PLMー	36-39	PLMー
28-31	PLMー	32-35	PLM+	36-39	PLM+
28-31	PLM+	32-35	PLM+	36-39	PLM+
28-31	PLM+	32-35	PLMー	36-39	PLM+
28-31	PLM+	32-35	PLM+	36-39	PLM+
28-31	PLM+	32-35	PLM+	36-39	PLM+
28-31	PLMー	32-35	PLM+	36-39	PLMー
28-31	PLM+	32-35	PLMー	36-39	PLM+
28-31	PLM+	32-35	PLMー	36-39	PLM+
28-31	PLMー	32-35	PLMー	36-39	PLMー
28-31	PLMー	32-35	PLMー	36-39	PLMー
28-31	PLM+	32-35	PLMー	36-39	PLM+
28-31	PLMー	32-35	PLMー	36-39	PLM+
28-31	PLMー	32-35	PLM+	36-39	PLM+
28-31	PLM+	32-35	PLM+	36-39	PLMー
28-31	PLM+	32-35	PLMー	36-39	PLM+
28-31	PLMー	32-35	PLMー	36-39	PLMー
28-31	PLM+	32-35	PLMー	36-39	PLM+
28-31	PLM+	32-35	PLMー	36-39	PLM+
28-31	PLM+	32-35	PLMー	36-39	PLM+
28-31	PLMー	32-35	PLMー	36-39	PLMー
28-31	PLMー	32-35	PLMー	36-39	PLMー
28-31	PLMー	32-35	PLMー	36-39	PLM+
28-31	PLMー	32-35	PLM+	36-39	PLM+
28-31	PLMー	32-35	PLMー	36-39	PLM+
28-31	PLMー	32-35	PLM+	36-39	PLMー
28-31	PLMー	32-35	PLMー	36-39	PLMー
28-31	PLM+	32-35	PLM+	36-39	PLM+
28-31	PLMー	32-35	PLM+	36-39	PLM+
28-31	PLMー	32-35	PLMー	36-39	PLMー
28-31	PLMー	32-35	PLMー	36-39	PLMー
28-31	PLMー	32-35	PLM+	36-39	PLMー
28-31	PLM+	32-35	PLMー	36-39	PLMー
28-31	PLMー	32-35	PLMー	36-39	PLMー
28-31	PLM+	32-35	PLM+	36-39	PLM+
28-31	PLM+	32-35	PLMー	36-39	PLMー
28-31	PLMー	32-35	PLM+	36-39	PLM+
28-31	PLM+	32-35	PLMー	36-39	PLM+
28-31	PLM+	32-35	PLM+	36-39	PLM+
28-31	PLM+	32-35	PLMー	36-39	PLMー
28-31	PLM+	32-35	PLMー	36-39	PLMー
28-31	PLMー	32-35	PLMー	36-39	PLM+
28-31	PLM+	32-35	PLM+	36-39	PLMー
28-31	PLM+	32-35	PLM+	36-39	PLM+
28-31	PLM+	32-35	PLM+	36-39	PLM+
28-31	PLM+	32-35	PLMー	36-39	PLM+
28-31	PLMー	32-35	PLMー	36-39	PLM+
28-31	PLM+	32-35	PLM+	36-39	PLMー
28-31	PLM+	32-35	PLMー	36-39	PLM+
28-31	PLMー	32-35	PLM+	36-39	PLM+
28-31	PLMー	32-35	PLMー	36-39	PLM+
28-31	PLMー	32-35	PLM+	36-39	PLM+
28-31	PLMー	32-35	PLMー	36-39	PLMー
28-31	PLMー	32-35	PLMー	36-39	PLM+
28-31	PLM+	32-35	PLM+	36-39	PLMー
28-31	PLM+	32-35	PLM+	36-39	PLM+
28-31	PLMー	32-35	PLM+	36-39	PLMー
28-31	PLM+	32-35	PLM+	36-39	PLM+
28-31	PLM+	32-35	PLM+	36-39	PLMー
28-31	PLM+	32-35	PLMー	36-39	PLM+
28-31	PLMー	32-35	PLM+	36-39	PLM+
28-31	PLM+	32-35	PLMー	36-39	PLM+
28-31	PLM+	32-35	PLMー	36-39	PLMー
28-31	PLMー	32-35	PLM+	36-39	PLM+
28-31	PLM+	32-35	PLMー	36-39	PLM+
28-31	PLM+	32-35	PLM+	36-39	PLM+
28-31	PLM+	32-35	PLM+	36-39	PLM+
28-31	PLMー	32-35	PLMー	36-39	PLMー
28-31	PLM+	32-35	PLM+	36-39	PLMー
28-31	PLM+	32-35	PLMー	36-39	PLM+
28-31	PLM+	32-35	PLMー	36-39	PLMー
28-31	PLMー	32-35	PLMー	36-39	PLMー
28-31	PLM+	32-35	PLMー	36-39	PLMー
28-31	PLM+	32-35	PLMー	36-39	PLMー
28-31	PLM+	32-35	PLM+	36-39	PLMー
28-31	PLM+	32-35	PLM+	36-39	PLMー
28-31	PLMー	32-35	PLM+	36-39	PLM+
28-31	PLM+	32-35	PLM+	36-39	PLM+
28-31	PLMー	32-35	PLM+	36-39	PLMー
28-31	PLM+	32-35	PLM+	36-39	PLMー
28-31	PLM+	32-35	PLM+	36-39	PLM+
28-31	PLM+	32-35	PLM+	36-39	PLM+
28-31	PLM+	32-35	PLMー	36-39	PLM+
28-31	PLM+	32-35	PLM+	36-39	PLMー
28-31	PLM+	32-35	PLM+	36-39	PLM+
28-31	PLMー	32-35	PLM+	36-39	PLM+
28-31	PLMー	32-35	PLMー	36-39	PLM+
28-31	PLM+	32-35	PLM+	36-39	PLM+
28-31	PLMー	32-35	PLMー	36-39	PLM+
28-31	PLM+	32-35	PLM+	36-39	PLM+
28-31	PLM+	32-35	PLM+	36-39	PLM+
28-31	PLMー	32-35	PLMー	36-39	PLM+
28-31	PLMー	32-35	PLM+	36-39	PLMー
28-31	PLMー	32-35	PLM+	36-39	PLM+
28-31	PLM+	32-35	PLM+	36-39	PLM+
28-31	PLMー	32-35	PLMー	36-39	PLM+
28-31	PLMー	32-35	PLM+	36-39	PLM+
28-31	PLM+	32-35	PLM+	36-39	PLM+
28-31	PLMー	32-35	PLMー	36-39	PLMー
28-31	PLMー	32-35	PLM+	36-39	PLM+
28-31	PLMー	32-35	PLM+	36-39	PLM+
28-31	PLM+	32-35	PLM+	36-39	PLMー
28-31	PLMー	32-35	PLMー	36-39	PLM+
28-31	PLM+	32-35	PLMー	36-39	PLM+
28-31	PLMー	32-35	PLM+	36-39	PLMー
28-31	PLMー	32-35	PLM+	36-39	PLMー
28-31	PLM+	32-35	PLMー	36-39	PLM+
28-31	PLMー	32-35	PLM+	36-39	PLM+
28-31	PLM+	32-35	PLM+	36-39	PLM+
28-31	PLMー	32-35	PLM+	36-39	PLM+
28-31	PLM+	32-35	PLM+	36-39	PLMー
28-31	PLMー	32-35	PLM+	36-39	PLM+
28-31	PLMー	32-35	PLM+	36-39	PLM+
28-31	PLMー	32-35	PLM+	36-39	PLMー
28-31	PLMー	32-35	PLM+	36-39	PLM+
28-31	PLMー	32-35	PLM+	36-39	PLM+
28-31	PLM+	32-35	PLM+	36-39	PLM+
28-31	PLMー	32-35	PLM+	36-39	PLM+
28-31	PLMー	32-35	PLMー	36-39	PLM+
28-31	PLM+	32-35	PLM+	36-39	PLMー
28-31	PLMー	32-35	PLM+	36-39	PLM+
28-31	PLMー	32-35	PLMー	36-39	PLMー
28-31	PLMー	32-35	PLMー	36-39	PLMー
28-31	PLM+	32-35	PLM+	36-39	PLM+
28-31	PLM+	32-35	PLMー	36-39	PLM+
28-31	PLM+	32-35	PLM+	36-39	PLMー
28-31	PLMー	32-35	PLM+	36-39	PLM+
28-31	PLMー	32-35	PLMー	36-39	PLM+
28-31	PLM+	32-35	PLM+	36-39	PLM+
28-31	PLMー	32-35	PLM+	36-39	PLMー
28-31	PLM+	32-35	PLMー	36-39	PLMー
28-31	PLMー	32-35	PLMー	36-39	PLM+
28-31	PLM+	32-35	PLM+	36-39	PLM+
28-31	PLM+	32-35	PLMー	36-39	PLMー
28-31	PLM+	32-35	PLMー	36-39	PLM+
28-31	PLM+	32-35	PLMー	36-39	PLMー
28-31	PLM+	32-35	PLM+	36-39	PLM+
28-31	PLM+	32-35	PLM+	36-39	PLMー
28-31	PLMー	32-35	PLMー	36-39	PLM+
28-31	PLMー	32-35	PLMー	36-39	PLMー
28-31	PLM+	32-35	PLMー	36-39	PLM+
28-31	PLM+	32-35	PLMー	36-39	PLMー
28-31	PLM+	32-35	PLM+	36-39	PLM+
28-31	PLM+	32-35	PLM+	36-39	PLMー
28-31	PLM+	32-35	PLM+	36-39	PLMー
28-31	PLMー	32-35	PLM+	36-39	PLMー
28-31	PLM+	32-35	PLM+	36-39	PLMー
28-31	PLM+	32-35	PLMー	36-39	PLMー
28-31	PLM+	32-35	PLM+	36-39	PLMー
28-31	PLM+	32-35	PLM+	36-39	PLMー
28-31	PLMー	32-35	PLM+	36-39	PLMー
28-31	PLM+	32-35	PLM+	36-39	PLMー
28-31	PLMー	32-35	PLM+	36-39	PLMー
28-31	PLM+	32-35	PLM+	36-39	PLM+
28-31	PLMー	32-35	PLM+	36-39	PLM+
28-31	PLM+	32-35	PLM+	36-39	PLM+
28-31	PLMー	32-35	PLMー	36-39	PLM+
28-31	PLMー	32-35	PLMー	36-39	PLM+
28-31	PLM+	32-35	PLM+	36-39	PLM+
28-31	PLMー	32-35	PLM+	36-39	PLM+
28-31	PLM+	32-35	PLM+	36-39	PLMー
28-31	PLM+	32-35	PLM+	36-39	PLM+
28-31	PLM+	32-35	PLM+	36-39	PLM+
28-31	PLM+	32-35	PLM+	36-39	PLM+
28-31	PLM+	32-35	PLM+	36-39	PLM+
28-31	PLMー	32-35	PLM+	36-39	PLM+
28-31	PLM+	32-35	PLM+	36-39	PLM+
28-31	PLM+	32-35	PLMー	36-39	PLM+
28-31	PLM+	32-35	PLM+	36-39	PLMー
28-31	PLMー	32-35	PLM+	36-39	PLM+
28-31	PLMー	32-35	PLMー	36-39	PLM+
28-31	PLM+	32-35	PLM+	36-39	PLM+
28-31	PLMー	32-35	PLMー	36-39	PLMー
28-31	PLM+	32-35	PLMー	36-39	PLMー
28-31	PLM+	32-35	PLM+	36-39	PLMー
28-31	PLM+	32-35	PLMー	36-39	PLMー
28-31	PLM+	32-35	PLM+	36-39	PLMー
28-31	PLM+	32-35	PLMー	36-39	PLMー
28-31	PLM+	32-35	PLMー	36-39	PLM+
28-31	PLMー	32-35	PLMー	36-39	PLM+
28-31	PLMー	32-35	PLM+	36-39	PLM+
28-31	PLM+	32-35	PLMー	36-39	PLMー
28-31	PLM+	32-35	PLM+	36-39	PLM+
28-31	PLM+	32-35	PLM+	36-39	PLM+
28-31	PLM+	32-35	PLMー	36-39	PLM+
28-31	PLMー	32-35	PLM+	36-39	PLM+
28-31	PLM+	32-35	PLM+	36-39	PLM+
28-31	PLMー	32-35	PLM+	36-39	PLM+
28-31	PLMー	32-35	PLM+	36-39	PLM+
28-31	PLMー	32-35	PLM+	36-39	PLM+
28-31	PLMー	32-35	PLM+	36-39	PLMー
28-31	PLM+	32-35	PLM+	36-39	PLM+
28-31	PLM+	32-35	PLM+	36-39	PLM+
28-31	PLMー	32-35	PLM+	36-39	PLM+
28-31	PLM+	32-35	PLM+	36-39	PLM+
28-31	PLMー	32-35	PLM+	36-39	PLM+
28-31	PLM+	32-35	PLM+	36-39	PLMー
28-31	PLM+	32-35	PLM+	36-39	PLMー
28-31	PLMー	32-35	PLM+	36-39	PLM+
28-31	PLM+	32-35	PLMー	36-39	PLM+
28-31	PLM+	32-35	PLM+	36-39	PLMー
28-31	PLM+	32-35	PLMー	36-39	PLMー
28-31	PLM+	32-35	PLM+	36-39	PLM+
28-31	PLM+	32-35	PLM+	36-39	PLM+
28-31	PLM+	32-35	PLM+	36-39	PLMー
28-31	PLM+	32-35	PLM+	36-39	PLMー
28-31	PLMー	32-35	PLM+	36-39	PLMー
28-31	PLMー	32-35	PLM+	36-39	PLMー
28-31	PLMー	32-35	PLMー	36-39	PLMー
28-31	PLM+	32-35	PLM+	36-39	PLM+
28-31	PLMー	32-35	PLM+	36-39	PLMー
28-31	PLM+	32-35	PLM+	36-39	PLMー
28-31	PLMー	32-35	PLM+	36-39	PLM+
28-31	PLMー	32-35	PLM+	36-39	PLM+
28-31	PLMー	32-35	PLM+	36-39	PLM+
28-31	PLMー	32-35	PLM+	36-39	PLM+
28-31	PLM+	32-35	PLM+	36-39	PLM+
28-31	PLMー	32-35	PLM+	36-39	PLMー
28-31	PLMー	32-35	PLMー	36-39	PLM+
28-31	PLMー	32-35	PLMー	36-39	PLM+
28-31	PLM+	32-35	PLMー	36-39	PLM+
28-31	PLMー	32-35	PLM+	36-39	PLM+
28-31	PLMー	32-35	PLM+	36-39	PLMー
28-31	PLM+	32-35	PLM+	36-39	PLM+
28-31	PLM+	32-35	PLMー	36-39	PLM+
28-31	PLM+	32-35	PLM+	36-39	PLMー
28-31	PLMー	32-35	PLM+	36-39	PLMー
28-31	PLMー	32-35	PLM+	36-39	PLMー
28-31	PLM+	32-35	PLMー	36-39	PLM+
28-31	PLM+	32-35	PLM+	36-39	PLM+
28-31	PLM+	32-35	PLM+	36-39	PLMー
28-31	PLM+	32-35	PLM+	36-39	PLM+
28-31	PLM+	32-35	PLMー	36-39	PLMー
28-31	PLMー	32-35	PLM+	36-39	PLM+
28-31	PLMー	32-35	PLMー	36-39	PLM+
28-31	PLM+	32-35	PLM+	36-39	PLMー
28-31	PLM+	32-35	PLMー	36-39	PLM+
28-31	PLM+	32-35	PLM+	36-39	PLM+
28-31	PLM+	32-35	PLMー	36-39	PLM+
28-31	PLMー	32-35	PLM+	36-39	PLM+
28-31	PLM+	32-35	PLMー	36-39	PLM+
28-31	PLMー	32-35	PLM+	36-39	PLMー
28-31	PLM+	32-35	PLM+	36-39	PLM+
28-31	PLMー	32-35	PLMー	36-39	PLMー
28-31	PLMー	32-35	PLM+	36-39	PLMー
28-31	PLM+	32-35	PLMー	36-39	PLM+
28-31	PLMー	32-35	PLMー	36-39	PLMー
28-31	PLMー	32-35	PLMー	36-39	PLMー
28-31	PLMー	32-35	PLM+	36-39	PLMー
28-31	PLMー	32-35	PLMー	36-39	PLMー
28-31	PLM+	32-35	PLM+	36-39	PLMー
28-31	PLM+	32-35	PLMー	36-39	PLMー
28-31	PLMー	32-35	PLMー	36-39	PLM+
28-31	PLM+	32-35	PLMー	36-39	PLMー
28-31	PLM+	32-35	PLMー	36-39	PLM+
28-31	PLM+	32-35	PLMー	36-39	PLM+
28-31	PLM+	32-35	PLMー	36-39	PLM+
28-31	PLM+	32-35	PLMー	36-39	PLM+
28-31	PLM+	32-35	PLMー	36-39	PLM+
28-31	PLM+	32-35	PLMー	36-39	PLM+
28-31	PLM+	32-35	PLM+	36-39	PLMー
28-31	PLM+	32-35	PLM+	36-39	PLMー
28-31	PLM+	32-35	PLM+	36-39	PLM+
28-31	PLM+	32-35	PLM+	36-39	PLMー
28-31	PLM+	32-35	PLMー	36-39	PLM+
28-31	PLM+	32-35	PLMー	36-39	PLMー
28-31	PLM+	32-35	PLM+	36-39	PLM+
28-31	PLM+	32-35	PLMー	36-39	PLM+
28-31	PLM+	32-35	PLM+	36-39	PLM+
28-31	PLM+	32-35	PLM+	36-39	PLM+
28-31	PLM+	32-35	PLM+	36-39	PLM+
28-31	PLM+	32-35	PLM+	36-39	PLM+
28-31	PLM+	32-35	PLMー	36-39	PLM+
28-31	PLMー	32-35	PLMー	36-39	PLM+
28-31	PLM+	32-35	PLM+	36-39	PLM+
28-31	PLM+	32-35	PLM+	36-39	PLM+
28-31	PLMー	32-35	PLM+	36-39	PLM+
28-31	PLMー	32-35	PLM+	36-39	PLM+
28-31	PLMー	32-35	PLM+	36-39	PLMー
28-31	PLM+	32-35	PLM+	36-39	PLM+
28-31	PLMー	32-35	PLM+	36-39	PLM+
28-31	PLM+	32-35	PLM+	36-39	PLMー
28-31	PLM+	32-35	PLM+	36-39	PLMー
28-31	PLMー	32-35	PLM+	36-39	PLMー
28-31	PLM+	32-35	PLM+	36-39	PLM+
28-31	PLM+	32-35	PLM+	36-39	PLM+
28-31	PLMー	32-35	PLM+	36-39	PLM+
28-31	PLMー	32-35	PLM+	36-39	PLM+
28-31	PLM+	32-35	PLMー	36-39	PLMー
28-31	PLM+	32-35	PLM+	36-39	PLM+
28-31	PLM+	32-35	PLMー	36-39	PLM+
28-31	PLMー	32-35	PLM+	36-39	PLM+
28-31	PLMー	32-35	PLMー	36-39	PLM+
28-31	PLM+	32-35	PLM+	36-39	PLMー
28-31	PLMー	32-35	PLM+	36-39	PLMー
28-31	PLMー	32-35	PLM+	36-39	PLM+
28-31	PLM+	32-35	PLMー
28-31	PLMー	32-35	PLM+
28-31	PLM+	32-35	PLMー
28-31	PLM+	32-35	PLM+
28-31	PLMー	32-35	PLMー
28-31	PLM+	32-35	PLMー
28-31	PLMー	32-35	PLM+
28-31	PLM+	32-35	PLM+
28-31	PLM+	32-35	PLMー
28-31	PLMー	32-35	PLM+
28-31	PLM+	32-35	PLM+
28-31	PLMー	32-35	PLM+
28-31	PLM+	32-35	PLM+
28-31	PLMー	32-35	PLM+
28-31	PLMー	32-35	PLM+
28-31	PLMー	32-35	PLMー
28-31	PLMー	32-35	PLMー
28-31	PLMー	32-35	PLM+
28-31	PLMー	32-35	PLMー
28-31	PLM+	32-35	PLM+
28-31	PLMー	32-35	PLM+
28-31	PLM+	32-35	PLM+
28-31	PLM+	32-35	PLMー
28-31	PLMー	32-35	PLM+
28-31	PLM+	32-35	PLM+
28-31	PLM+	32-35	PLMー
28-31	PLM+	32-35	PLM+
28-31	PLM+	32-35	PLM+
28-31	PLM+	32-35	PLM+
28-31	PLMー	32-35	PLMー
28-31	PLMー	32-35	PLM+
28-31	PLM+	32-35	PLM+
28-31	PLM+	32-35	PLMー
28-31	PLM+	32-35	PLM+
28-31	PLM+	32-35	PLM+
28-31	PLM+	32-35	PLMー
28-31	PLM+	32-35	PLM+
28-31	PLM+	32-35	PLMー
28-31	PLM+	32-35	PLM+
28-31	PLM+	32-35	PLM+
28-31	PLM+	32-35	PLM+
28-31	PLM+	32-35	PLMー
28-31	PLM+	32-35	PLM+
28-31	PLM+	32-35	PLM+
28-31	PLM+	32-35	PLM+
28-31	PLM+	32-35	PLMー
28-31	PLMー	32-35	PLM+
28-31	PLM+	32-35	PLM+
28-31	PLM+	32-35	PLM+
28-31	PLM+	32-35	PLM+
28-31	PLM+	32-35	PLM+
28-31	PLM+	32-35	PLMー
28-31	PLM+	32-35	PLMー
28-31	PLMー	32-35	PLM+
28-31	PLMー	32-35	PLMー
28-31	PLM+	32-35	PLM+
28-31	PLM+	32-35	PLMー
28-31	PLMー	32-35	PLM+
28-31	PLM+	32-35	PLMー
28-31	PLMー	32-35	PLMー
28-31	PLM+	32-35	PLM+
28-31	PLMー	32-35	PLMー
28-31	PLM+	32-35	PLMー
28-31	PLM+	32-35	PLMー
28-31	PLMー	32-35	PLM+
28-31	PLM+	32-35	PLMー
28-31	PLM+	32-35	PLM+
28-31	PLMー	32-35	PLMー
28-31	PLM+	32-35	PLM+
28-31	PLMー	32-35	PLMー
28-31	PLM+	32-35	PLM+
28-31	PLM+	32-35	PLM+
28-31	PLMー	32-35	PLM+
28-31	PLM+	32-35	PLMー
28-31	PLM+	32-35	PLM+
28-31	PLMー	32-35	PLMー
28-31	PLM+	32-35	PLMー
28-31	PLM+	32-35	PLM+
28-31	PLMー	32-35	PLM+
28-31	PLMー	32-35	PLMー
28-31	PLM+	32-35	PLM+
28-31	PLM+	32-35	PLM+
28-31	PLM+	32-35	PLMー
28-31	PLM+	32-35	PLMー
28-31	PLM+	32-35	PLM+
28-31	PLM+	32-35	PLM+
28-31	PLM+	32-35	PLM+
28-31	PLM+	32-35	PLM+
28-31	PLM+	32-35	PLMー
28-31	PLM+	32-35	PLMー
28-31	PLMー	32-35	PLM+
28-31	PLM+	32-35	PLM+
28-31	PLMー	32-35	PLMー
28-31	PLM+	32-35	PLMー
28-31	PLM+	32-35	PLM+
28-31	PLM+	32-35	PLMー
28-31	PLM+	32-35	PLMー
28-31	PLM+	32-35	PLMー
28-31	PLMー	32-35	PLM+
28-31	PLM+	32-35	PLMー
28-31	PLM+	32-35	PLM+
28-31	PLMー	32-35	PLMー
28-31	PLM+	32-35	PLM+
28-31	PLMー	32-35	PLM+
28-31	PLMー	32-35	PLMー
28-31	PLM+	32-35	PLMー
28-31	PLM+	32-35	PLM+
28-31	PLMー	32-35	PLM+
28-31	PLM+	32-35	PLMー
28-31	PLM+	32-35	PLM+
28-31	PLM+	32-35	PLM+
28-31	PLMー	32-35	PLM+
28-31	PLM+	32-35	PLM+
28-31	PLM+	32-35	PLM+
28-31	PLMー	32-35	PLM+
28-31	PLM+	32-35	PLM+
28-31	PLM+	32-35	PLM+
28-31	PLMー	32-35	PLM+
28-31	PLMー	32-35	PLM+
28-31	PLMー	32-35	PLMー
28-31	PLMー	32-35	PLM+
28-31	PLMー	32-35	PLM+
28-31	PLMー	32-35	PLM+
28-31	PLMー	32-35	PLM+
28-31	PLMー	32-35	PLM+
28-31	PLM+	32-35	PLM+
28-31	PLM+	32-35	PLMー
28-31	PLMー	32-35	PLM+
28-31	PLMー	32-35	PLMー
28-31	PLMー	32-35	PLM+
28-31	PLMー	32-35	PLM+
28-31	PLM+	32-35	PLM+
28-31	PLM+	32-35	PLM+
28-31	PLMー	32-35	PLMー
28-31	PLM+	32-35	PLMー
28-31	PLM+	32-35	PLM+
28-31	PLM+	32-35	PLM+
28-31	PLMー	32-35	PLM+
28-31	PLM+	32-35	PLMー
28-31	PLM+	32-35	PLMー
28-31	PLM+	32-35	PLM+
28-31	PLM+	32-35	PLMー
28-31	PLM+	32-35	PLM+
28-31	PLMー	32-35	PLM+
28-31	PLMー	32-35	PLM+
28-31	PLM+	32-35	PLMー
		32-35	PLM+
		32-35	PLM+
		32-35	PLMー
		32-35	PLMー
		32-35	PLM+
		32-35	PLMー
		32-35	PLM+
		32-35	PLM+
		32-35	PLM+
		32-35	PLM+
		32-35	PLMー
		32-35	PLM+
		32-35	PLMー
		32-35	PLM+
		32-35	PLM+
		32-35	PLM+
		32-35	PLMー
		32-35	PLMー
		32-35	PLMー
		32-35	PLM+
		32-35	PLMー
		32-35	PLMー
		32-35	PLMー
		32-35	PLM+
		32-35	PLMー
		32-35	PLMー
		32-35	PLM+
		32-35	PLMー
		32-35	PLMー
		32-35	PLMー
		32-35	PLMー
		32-35	PLMー
		32-35	PLMー
		32-35	PLMー
		32-35	PLMー
		32-35	PLM+
		32-35	PLM+
		32-35	PLMー
		32-35	PLMー
		32-35	PLM+
		32-35	PLM+
		32-35	PLM+
		32-35	PLM+
		32-35	PLM+
		32-35	PLMー
		32-35	PLM+
		32-35	PLMー
		32-35	PLMー
		32-35	PLM+
		32-35	PLM+
		32-35	PLM+
		32-35	PLM+
		32-35	PLM+
		32-35	PLMー
		32-35	PLM+
		32-35	PLMー
		32-35	PLM+
		32-35	PLM+
		32-35	PLM+
		32-35	PLM+
		32-35	PLM+
		32-35	PLMー
		32-35	PLM+
		32-35	PLM+
		32-35	PLM+
		32-35	PLMー
		32-35	PLMー
		32-35	PLMー
		32-35	PLM+
		32-35	PLMー
		32-35	PLM+
		32-35	PLM+
		32-35	PLM+
		32-35	PLM+
		32-35	PLMー
		32-35	PLM+
		32-35	PLMー
		32-35	PLM+
		32-35	PLM+
		32-35	PLMー
		32-35	PLMー
		32-35	PLMー
		32-35	PLMー
		32-35	PLMー
		32-35	PLM+
		32-35	PLM+
		32-35	PLM+
		32-35	PLM+
		32-35	PLM+
		32-35	PLM+
		32-35	PLM+
		32-35	PLMー
		32-35	PLMー
		32-35	PLM+
		32-35	PLM+
		32-35	PLM+
		32-35	PLM+
		32-35	PLMー
		32-35	PLM+
		32-35	PLMー
		32-35	PLM+
		32-35	PLM+
		32-35	PLMー
		32-35	PLMー
		32-35	PLM+
		32-35	PLMー
		32-35	PLM+
		32-35	PLM+
		32-35	PLMー
		32-35	PLM+
		32-35	PLM+
		32-35	PLM+
		32-35	PLMー
		32-35	PLMー
		32-35	PLM+
		32-35	PLM+
		32-35	PLMー
		32-35	PLMー
		32-35	PLM+
		32-35	PLM+
		32-35	PLM+
		32-35	PLM+
		32-35	PLM+
		32-35	PLM+
		32-35	PLMー
		32-35	PLM+
		32-35	PLM+
		32-35	PLM+
		32-35	PLM+
		32-35	PLM+
		32-35	PLM+
		32-35	PLMー
		32-35	PLM+
		32-35	PLM+
		32-35	PLMー
		32-35	PLM+
		32-35	PLM+
		32-35	PLMー
		32-35	PLMー
		32-35	PLMー
		32-35	PLMー
		32-35	PLMー
		32-35	PLM+
		32-35	PLM+
		32-35	PLMー
		32-35	PLMー
		32-35	PLM+
		32-35	PLM+
		32-35	PLM+
		32-35	PLM+
		32-35	PLM+
		32-35	PLM+
		32-35	PLM+
		32-35	PLM+
		32-35	PLMー
		32-35	PLM+
		32-35	PLM+
		32-35	PLM+
		32-35	PLM+
		32-35	PLM+
		32-35	PLM+
		32-35	PLM+
		32-35	PLM+

## Sheet: Question
PLM group	weeks	PLM±	time spent awake	fetal movement
study group	28	あり	2	24.94
study group	28	なし	1	6.76
study group	28	あり	4	1.75
study group	28	あり	1	14.36
study group	28	なし	2	8.85
study group	28	あり	3	17.01
study group	28	あり	1	12.02
study group	28	なし	1	28.17
study group	28	あり	3	17.75
study group	28	あり	0	22.58
study group	28	あり	1	20.48
study group	28	あり	0	8.19
study group	28	あり	1	6.96
study group	28	あり	3	33.35
study group	28	あり	1	34.54
study group	28	あり	1	10.23
study group	28	あり	0	12.83
study group	28	あり	1	10.69
study group	28	あり	0	10.49
study group	28	あり	1	18.49
study group	28	あり	1	16.95
study group	28	あり	1	9.35
study group	28	あり	2	6.38
study group	28	あり	2	37.09
study group	28	あり	1	37.63
study group	28	あり	1	11.86
study group	28	あり	2	1.94
study group	28	なし	1	8.97
study group	28	あり	3	23.08
study group	28	あり	1	16.39
study group	28	なし	1	23.17
study group	28	あり	1	16.49
study group	28	あり	2	17.74
study group	28	あり	2	3.74
study group	28	あり	0	26.02
study group	28	なし	0	6.67
study group	28	あり	2	8.26
study group	28	あり	0	33.81
study group	28	あり	1	28.95
study group	28	なし	0	13.99
study group	28	あり	1	10.1
study group	28	あり	3	8.32
study group	28	あり	2	15.67
study group	28	あり	2	10.03
study group	28	あり	1	35.27
study group	28	なし	2	28.04
study group	28	あり	1	25.03
study group	28	なし	0	16.99
study group	28	なし	1	16.86
study group	28	あり	3	8.23
study group	28	なし	1	12.58
study group	28	あり	1	5.09
study group	28	あり	1	24.64
study group	28	あり	3	23.34
study group	28	なし	2	10.22
study group	28	あり	0	4.41
study group	28	あり	1	9.02
study group	28	あり	1	14.32
study group	28	あり	1	33.42
study group	28	あり	1	11.61
study group	28	なし	2	33.9
study group	28	あり	3	27.17
study group	28	あり	1	16.91
study group	28	あり	0	17.01
study group	28	あり	1	18.62
study group	28	あり	1	11.44
study group	28	あり	2	14.85
study group	28	なし	0	9.02
study group	28	あり	1	26.82
study group	28	あり	0	18.47
study group	28	なし	4	29.62
study group	28	あり	2	25.08
study group	28	なし	1	7.15
study group	28	あり	1	28.32
study group	28	なし	2	21.07
study group	28	あり	0	6.77
study group	28	あり	2	25.49
study group	28	あり	1	9.05
study group	28	なし	0	10.68
study group	28	あり	1	9.5
study group	28	あり	2	20.49
study group	28	あり	0	20.7
study group	28	あり	1	16.78
study group	28	なし	2	3.54
study group	28	あり	0	24.44
study group	28	なし	2	8.39
study group	28	あり	0	8.13
study group	28	あり	1	14.33
study group	28	あり	1	17.02
study group	28	あり	1	22.57
study group	28	あり	1	1.34
study group	28	あり	0	25.45
study group	28	あり	0	33.05
study group	28	あり	1	18.87
study group	28	なし	2	32.51
study group	28	なし	2	20.05
study group	28	なし	2	8.53
study group	28	あり	2	21.08
study group	28	あり	1	6.2
study group	28	あり	1	8
study group	28	あり	1	15.09
study group	28	なし	2	16.02
study group	28	あり	1	24.8
study group	28	なし	2	8.76
study group	28	なし	2	8.98
study group	28	あり	2	17.55
study group	28	あり	1	35.77
study group	28	なし	2	15.94
study group	28	なし	2	16.34
study group	28	あり	3	25.27
study group	28	なし	0	19.06
study group	28	なし	0	25.04
study group	28	なし	0	9.52
study group	29	あり	2	18.13
study group	29	あり	1	24.01
study group	29	あり	1	17.62
study group	29	あり	1	18.08
study group	29	なし	3	16.78
study group	29	あり	2	20.17
study group	29	あり	1	3.82
study group	29	あり	1	19.72
study group	29	あり	0	7.73
study group	29	あり	1	34.53
study group	29	あり	0	11.87
study group	29	あり	1	13.75
study group	29	あり	1	13.95
study group	29	あり	0	30.96
study group	29	あり	1	30.28
study group	29	あり	0	21.8
study group	29	あり	2	23.67
study group	29	あり	1	9.25
study group	29	あり	1	29.83
study group	29	あり	1	24.1
study group	29	あり	1	19.7
study group	29	あり	3	21.58
study group	29	あり	2	4.73
study group	29	あり	1	4.06
study group	29	あり	2	26.63
study group	29	あり	1	18.54
study group	29	あり	1	21.33
study group	29	あり	3	20.53
study group	29	あり	0	25.57
study group	29	なし	3	21.63
study group	29	あり	1	5.97
study group	29	あり	1	4.27
study group	29	なし	3	18.14
study group	29	あり	0	10.03
study group	29	あり	1	19.8
study group	29	あり	0	35.34
study group	29	あり	2	3.76
study group	29	なし	1	20.22
study group	29	なし	1	16.42
study group	29	あり	2	33.55
study group	29	なし	1	26.68
study group	29	あり	1	16.51
study group	29	なし	2	11.29
study group	29	なし	1	31.93
study group	29	あり	1	17.27
study group	29	あり	1	9.08
study group	29	なし	1	39.04
study group	29	あり	3	20.9
study group	29	あり	2	27.06
study group	29	あり	3	9.62
study group	29	なし	3	9.36
study group	29	あり	3	8.74
study group	29	あり	1	20.66
study group	29	あり	1	29.18
study group	29	あり	1	23.67
study group	29	あり	2	28.84
study group	29	あり	0	17.92
study group	29	なし	2	22.64
study group	29	あり	2	14.2
study group	29	あり	0	10.7
study group	29	あり	1	35.73
study group	29	あり	0	7.92
study group	29	あり	2	32.49
study group	29	なし	0	12.18
study group	29	あり	1	11.5
study group	29	あり	1	29.4
study group	29	なし	3	6.72
study group	29	あり	2	23.01
study group	29	あり	1	25.4
study group	29	あり	0	23.01
study group	29	あり	3	20.47
study group	29	あり	1	22.05
study group	29	なし	0	7.96
study group	29	あり	1	6.3
study group	29	あり	4	8.69
study group	29	あり	0	17.08
study group	29	あり	2	20.62
study group	29	なし	2	15.16
study group	29	なし	2	13.86
study group	29	なし	0	12.3
study group	29	あり	0	12.73
study group	29	あり	1	22.61
study group	29	あり	3	11.31
study group	29	あり	1	6.77
study group	29	あり	2	10.96
study group	29	あり	0	20.01
study group	29	あり	2	25.85
study group	29	あり	1	29.54
study group	29	あり	0	17.74
study group	29	あり	0	6.31
study group	29	あり	1	16.92
study group	29	あり	2	42.51
study group	29	あり	0	21.44
study group	29	あり	1	13.88
study group	29	あり	1	20.16
study group	29	なし	3	10.12
study group	29	あり	3	10.09
study group	29	あり	3	23.49
study group	29	あり	2	7.24
study group	29	あり	0	19.41
study group	29	あり	1	2.94
study group	29	なし	1	5.36
study group	29	あり	2	14.14
study group	29	なし	1	18.49
study group	29	あり	3	15.31
study group	29	あり	2	9.94
study group	29	あり	1	19.08
study group	29	あり	2	12.55
study group	29	あり	1	13.53
study group	29	なし	1	21.05
study group	29	なし	0	25.21
study group	29	あり	2	22.66
study group	29	なし	0	17.93
study group	29	あり	0	10.69
study group	29	あり	1	24.76
study group	29	あり	0	23.69
study group	29	なし	0	22.06
study group	29	あり	2	25.18
study group	29	あり	2	13.75
study group	29	あり	1	13.29
study group	29	あり	1	28.98
study group	29	なし	3	18.56
study group	29	あり	3	12.38
study group	29	なし	1	30.56
study group	30	あり	1	7.74
study group	30	あり	2	20.71
study group	30	あり	1	5.24
study group	30	なし	1	9.29
study group	30	あり	3	6.17
study group	30	あり	1	12
study group	30	あり	1	10.25
study group	30	あり	4	21.65
study group	30	あり	2	13.65
study group	30	あり	1	22.08
study group	30	あり	0	14.53
study group	30	あり	1	21.1
study group	30	あり	3	32.43
study group	30	なし	1	24.99
study group	30	あり	1	32.95
study group	30	あり	1	16.08
study group	30	あり	1	8.16
study group	30	あり	1	12.34
study group	30	あり	1	14.89
study group	30	あり	1	8.17
study group	30	あり	1	29
study group	30	あり	1	24.64
study group	30	あり	3	26.6
study group	30	あり	1	17.11
study group	30	あり	2	22.56
study group	30	なし	1	14.46
study group	30	あり	1	20.83
study group	30	あり	1	23.34
study group	30	あり	1	7.16
study group	30	あり	1	21.98
study group	30	あり	2	25.56
study group	30	あり	1	7.75
study group	30	あり	1	8.43
study group	30	あり	2	18.07
study group	30	あり	1	6.97
study group	30	なし	1	15.92
study group	30	なし	0	23
study group	30	あり	1	32.94
study group	30	なし	2	14.8
study group	30	あり	1	24.65
study group	30	なし	0	4.73
study group	30	あり	2	4.66
study group	30	あり	2	8.12
study group	30	なし	1	23.56
study group	30	あり	2	21.41
study group	30	あり	1	10.41
study group	30	あり	1	8.89
study group	30	なし	4	14.48
study group	30	あり	2	28.88
study group	30	なし	1	23.25
study group	30	なし	3	32.97
study group	30	あり	1	25.11
study group	30	なし	1	24.38
study group	30	なし	0	18.92
study group	30	なし	1	7.74
study group	30	あり	1	35.74
study group	30	あり	2	24.34
study group	30	あり	3	6.52
study group	30	なし	1	6.46
study group	30	あり	4	6.19
study group	30	なし	2	12.21
study group	30	あり	1	24.05
study group	30	あり	2	20.13
study group	30	あり	1	13.66
study group	30	あり	0	8.92
study group	30	あり	1	9.75
study group	30	あり	1	14.09
study group	30	あり	0	30.1
study group	30	なし	2	25.98
study group	30	なし	1	21.18
study group	30	あり	1	22.64
study group	30	あり	1	17.53
study group	30	あり	2	8.31
study group	30	あり	0	37.05
study group	30	あり	2	11.38
study group	30	あり	0	28.86
study group	30	あり	1	7.85
study group	30	あり	1	25.42
study group	30	あり	3	35.09
study group	30	なし	2	6.96
study group	30	あり	3	18.41
study group	30	あり	4	24.65
study group	30	なし	1	12.74
study group	30	あり	0	6.82
study group	30	なし	0	26.15
study group	30	あり	2	22.34
study group	30	あり	0	16.27
study group	30	あり	2	9.03
study group	30	なし	2	16.7
study group	30	あり	0	17
study group	30	あり	2	16.55
study group	30	あり	1	5.81
study group	30	なし	0	11.61
study group	30	なし	0	16.34
study group	30	あり	0	6.54
study group	30	なし	1	27.85
study group	30	あり	2	10.9
study group	30	あり	1	22.81
study group	30	あり	1	17.42
study group	30	あり	1	1.93
study group	30	あり	1	10.27
study group	30	なし	1	17.52
study group	30	あり	1	9.25
study group	30	あり	1	10.74
study group	30	あり	2	10.04
study group	30	あり	0	20.14
study group	30	なし	1	38.5
study group	30	あり	0	7.44
study group	30	なし	2	22.71
study group	30	なし	2	5.11
study group	30	あり	3	19.75
study group	30	あり	1	7.83
study group	30	あり	0	2.21
study group	30	あり	2	37.51
study group	30	あり	0	7.46
study group	30	あり	1	17.06
study group	30	あり	3	35.04
study group	30	あり	3	14.55
study group	30	あり	1	22.17
study group	30	なし	1	16.99
study group	30	あり	1	9.61
study group	30	なし	1	12.94
study group	30	あり	1	29.98
study group	30	なし	1	16.95
study group	30	あり	3	10.37
study group	30	あり	2	14.12
study group	30	あり	1	25.7
study group	30	あり	1	11.38
study group	30	あり	0	19
study group	30	あり	0	19.82
study group	30	あり	1	16.62
study group	30	あり	1	22.47
study group	30	なし	2	15.25
study group	30	あり	1	17.42
study group	30	なし	1	8.91
study group	30	なし	1	27.25
study group	31	あり	2	21.1
study group	31	あり	1	3.22
study group	31	あり	1	5.64
study group	31	なし	2	22.39
study group	31	あり	2	7.54
study group	31	あり	1	7.59
study group	31	なし	1	5.26
study group	31	あり	5	16.87
study group	31	なし	1	18.01
study group	31	あり	1	21.58
study group	31	あり	0	7.11
study group	31	あり	0	20.23
study group	31	あり	2	14.68
study group	31	あり	0	12.12
study group	31	あり	2	21.52
study group	31	あり	1	21.67
study group	31	あり	2	20.51
study group	31	あり	0	13.25
study group	31	あり	1	16.9
study group	31	あり	3	20.44
study group	31	あり	0	20.5
study group	31	あり	1	13.07
study group	31	あり	2	5.93
study group	31	あり	1	23.61
study group	31	あり	1	4.2
study group	31	あり	0	17.4
study group	31	あり	1	17.95
study group	31	あり	1	12.17
study group	31	あり	1	28.41
study group	31	あり	2	17.58
study group	31	あり	3	22.31
study group	31	あり	2	9.55
study group	31	あり	2	17.94
study group	31	なし	0	24.41
study group	31	あり	1	8.93
study group	31	あり	2	13.12
study group	31	なし	1	18.58
study group	31	あり	1	6.37
study group	31	あり	1	8.72
study group	31	なし	0	11.3
study group	31	あり	0	22.22
study group	31	あり	1	15.85
study group	31	あり	1	18.45
study group	31	なし	3	11.79
study group	31	あり	1	16.64
study group	31	なし	0	17.09
study group	31	あり	4	5.64
study group	31	あり	3	12.31
study group	31	あり	1	7.98
study group	31	あり	2	34.71
study group	31	あり	1	19.87
study group	31	あり	1	13.29
study group	31	あり	0	12.81
study group	31	あり	1	11.71
study group	31	なし	1	20.29
study group	31	なし	1	12.45
study group	31	あり	1	16.76
study group	31	なし	1	13.38
study group	31	あり	0	30.7
study group	31	あり	1	19.42
study group	31	なし	2	15.54
study group	31	あり	0	6.77
study group	31	あり	1	26.58
study group	31	あり	1	12.31
study group	31	あり	4	7.2
study group	31	あり	1	8.59
study group	31	なし	2	25.14
study group	31	あり	4	22.58
study group	31	あり	1	5.79
study group	31	あり	4	19.02
study group	31	あり	2	5.48
study group	31	あり	1	7.28
study group	31	あり	0	11.83
study group	31	あり	1	26.71
study group	31	あり	2	25.09
study group	31	あり	1	13.48
study group	31	あり	1	23.19
study group	31	あり	3	23.11
study group	31	あり	1	15.13
study group	31	あり	1	14.49
study group	31	あり	1	10.83
study group	31	あり	1	28.01
study group	31	あり	2	10.27
study group	31	あり	0	29.06
study group	31	あり	4	23.71
study group	31	あり	0	21.4
study group	31	あり	1	4.57
study group	31	あり	4	22.14
study group	31	なし	3	9.25
study group	31	あり	2	22.16
study group	31	あり	1	17.37
study group	31	あり	1	5.02
study group	31	なし	0	17.18
study group	31	あり	2	23.57
study group	31	あり	0	12.82
study group	31	あり	3	7.26
study group	31	なし	0	18.72
study group	31	あり	2	15.97
study group	31	なし	3	18.6
study group	31	あり	2	22.98
study group	31	あり	3	7.79
study group	31	なし	2	9.49
study group	31	あり	1	13.33
study group	31	あり	1	14
study group	31	なし	2	21.01
study group	31	あり	2	14.13
study group	31	あり	1	22.54
study group	31	なし	0	19.47
study group	31	なし	1	28.8
study group	31	あり	1	2.25
study group	31	あり	1	24.96
study group	31	あり	0	21.99
study group	31	あり	0	17.08
study group	31	あり	1	10.54
study group	31	あり	1	32.81
study group	31	あり	1	10.59
study group	31	あり	2	8.63
study group	31	あり	1	2.8
study group	31	あり	2	6.49
study group	31	あり	3	11.99
study group	31	あり	0	4.91
study group	31	あり	0	5.2
study group	31	あり	2	24.04
study group	31	あり	3	37.02
study group	31	あり	0	12.96
study group	31	なし	2	11.92
study group	31	あり	5	9.45
study group	31	あり	1	25.03
study group	31	あり	1	14.83
study group	31	あり	1	14.24
study group	31	なし	2	13.71
study group	31	あり	3	25.65
study group	31	なし	1	12.14
study group	31	あり	0	17.17
study group	31	あり	1	17.64
study group	31	あり	1	22.09
study group	31	あり	1	15.79
study group	31	なし	0	25.8
study group	31	あり	1	14.63
study group	31	あり	1	17.91
study group	31	あり	0	29.94
study group	31	なし	3	31.08
study group	31	あり	1	25.32
study group	31	あり	1	15.52
study group	31	あり	1	13.67
study group	31	あり	1	11.77
study group	31	なし	1	23.63
study group	31	あり	1	24.56
study group	31	なし	1	29.11
study group	31	なし	1	16.85
study group	32	あり	2	5.79
study group	32	あり	1	28.76
study group	32	なし	1	3.34
study group	32	なし	2	18.38
study group	32	なし	1	13.31
study group	32	あり	1	10.04
study group	32	あり	1	11.95
study group	32	あり	0	14.48
study group	32	あり	2	11.41
study group	32	あり	3	15.68
study group	32	あり	1	31.12
study group	32	あり	1	26.32
study group	32	あり	2	14.18
study group	32	あり	1	12.35
study group	32	あり	0	8.27
study group	32	あり	0	9.61
study group	32	あり	2	21.57
study group	32	あり	1	22.05
study group	32	あり	3	16.36
study group	32	あり	2	18.79
study group	32	あり	3	23.58
study group	32	あり	1	19.61
study group	32	あり	0	5.77
study group	32	あり	0	22.82
study group	32	なし	0	25.09
study group	32	あり	1	31.27
study group	32	あり	1	20.76
study group	32	あり	2	2.33
study group	32	なし	0	14.26
study group	32	あり	1	22.47
study group	32	あり	0	14.29
study group	32	あり	2	13.26
study group	32	あり	1	14.89
study group	32	あり	4	15.29
study group	32	あり	3	18.15
study group	32	あり	0	7.89
study group	32	あり	1	11.09
study group	32	あり	2	19.66
study group	32	なし	2	7.36
study group	32	あり	0	20.91
study group	32	あり	1	5.42
study group	32	あり	2	10.57
study group	32	あり	3	3.93
study group	32	なし	2	16.01
study group	32	あり	1	19.63
study group	32	あり	0	16.78
study group	32	なし	1	10.31
study group	32	あり	1	24.3
study group	32	あり	0	10.09
study group	32	なし	3	10.87
study group	32	あり	2	28.23
study group	32	なし	1	16.77
study group	32	なし	0	10.85
study group	32	あり	2	6.7
study group	32	なし	1	16.58
study group	32	あり	2	8.94
study group	32	なし	1	5.09
study group	32	あり	0	9.61
study group	32	なし	3	19.68
study group	32	なし	1	9.67
study group	32	あり	2	14.09
study group	32	あり	1	6.65
study group	32	なし	1	7.46
study group	32	あり	1	11.31
study group	32	あり	1	9.6
study group	32	あり	3	23.16
study group	32	あり	1	8.5
study group	32	あり	2	12.27
study group	32	あり	3	26.5
study group	32	あり	2	22.65
study group	32	あり	4	13.92
study group	32	なし	2	11.2
study group	32	なし	3	4.82
study group	32	あり	0	14.38
study group	32	なし	1	15.72
study group	32	なし	1	19.12
study group	32	なし	2	22.87
study group	32	なし	1	11.39
study group	32	あり	1	12.82
study group	32	あり	1	17.73
study group	32	なし	2	13.16
study group	32	あり	0	13.86
study group	32	あり	1	23.82
study group	32	あり	1	14
study group	32	あり	2	24.33
study group	32	あり	1	23.45
study group	32	あり	1	18.18
study group	32	あり	1	8.84
study group	32	あり	1	18.7
study group	32	あり	3	21.44
study group	32	なし	3	21.83
study group	32	あり	1	16.43
study group	32	なし	2	15.52
study group	32	なし	1	9.24
study group	32	なし	0	26.75
study group	32	あり	1	16.48
study group	32	あり	4	16.84
study group	32	あり	0	17.51
study group	32	あり	3	12.81
study group	32	あり	1	7.39
study group	32	あり	3	15.75
study group	32	あり	0	16.48
study group	32	あり	2	19.01
study group	32	なし	3	9.81
study group	32	あり	2	12.36
study group	32	なし	1	7.48
study group	32	あり	1	20.11
study group	32	あり	3	24.63
study group	32	なし	1	12.04
study group	32	あり	2	6.4
study group	32	あり	0	27.25
study group	32	あり	1	13.73
study group	32	なし	1	30.77
study group	32	あり	0	25.78
study group	32	あり	1	15.09
study group	32	あり	2	2.17
study group	32	なし	1	21.62
study group	32	あり	2	19.96
study group	32	あり	2	17.14
study group	32	あり	2	12.04
study group	32	なし	1	28.31
study group	32	あり	1	25.23
study group	32	あり	1	7.61
study group	32	あり	3	19.08
study group	32	あり	1	7.7
study group	32	あり	3	2.23
study group	32	あり	1	19.98
study group	32	あり	3	23.47
study group	32	なし	2	15.59
study group	32	あり	2	10.9
study group	32	あり	5	5.89
study group	32	あり	1	21.96
study group	32	なし	0	13.13
study group	32	なし	2	7.18
study group	32	あり	1	12.96
study group	32	なし	1	19.88
study group	32	あり	1	17.26
study group	32	あり	0	16.93
study group	32	あり	1	12.21
study group	32	あり	1	17.83
study group	32	なし	1	22.8
study group	32	あり	0	14.99
study group	32	あり	0	14.16
study group	32	あり	1	16.63
study group	32	なし	0	33.6
study group	32	あり	3	19.95
study group	32	あり	1	4.99
study group	32	なし	2	15.79
study group	32	あり	0	4.69
study group	32	なし	0	13.47
study group	32	あり	2	17.21
study group	32	あり	3	16.37
study group	32	なし	0	27.04
study group	33	あり	1	16.34
study group	33	あり	3	2.91
study group	33	あり	0	12.52
study group	33	あり	1	8.06
study group	33	あり	1	7.78
study group	33	あり	1	8.12
study group	33	あり	2	4.87
study group	33	あり	2	23.19
study group	33	なし	1	10.28
study group	33	あり	1	8.17
study group	33	あり	0	13.5
study group	33	あり	0	21.11
study group	33	あり	2	10.67
study group	33	あり	2	17.93
study group	33	あり	2	13.02
study group	33	あり	3	8.54
study group	33	あり	0	8.2
study group	33	あり	4	15.44
study group	33	あり	2	22.71
study group	33	あり	1	16.26
study group	33	あり	1	16.01
study group	33	あり	3	9.94
study group	33	あり	2	16.95
study group	33	あり	1	4.49
study group	33	あり	1	16.22
study group	33	なし	3	8.34
study group	33	あり	1	32.1
study group	33	あり	2	30.94
study group	33	なし	0	14.7
study group	33	あり	1	18.79
study group	33	なし	1	26.3
study group	33	あり	1	21.51
study group	33	あり	3	7.52
study group	33	あり	1	14.45
study group	33	なし	2	31.35
study group	33	あり	3	8.79
study group	33	あり	2	7.31
study group	33	あり	1	19.62
study group	33	なし	2	10.09
study group	33	あり	3	9.79
study group	33	あり	3	21.38
study group	33	あり	1	7.85
study group	33	あり	0	5.16
study group	33	なし	1	15.58
study group	33	あり	1	16.06
study group	33	あり	1	17.02
study group	33	あり	2	15.69
study group	33	なし	1	10.12
study group	33	あり	3	14.49
study group	33	あり	0	7.83
study group	33	あり	2	14.45
study group	33	あり	1	6.76
study group	33	あり	1	13.44
study group	33	なし	1	7.88
study group	33	なし	1	21.52
study group	33	あり	5	16.42
study group	33	あり	4	17.41
study group	33	あり	2	2.65
study group	33	あり	2	20.2
study group	33	なし	1	15.93
study group	33	あり	2	22.31
study group	33	あり	1	20.6
study group	33	なし	2	16.19
study group	33	あり	1	16.92
study group	33	なし	0	18.31
study group	33	なし	1	5.84
study group	33	あり	0	6.87
study group	33	なし	1	21.2
study group	33	あり	6	10.91
study group	33	なし	0	6.19
study group	33	あり	1	23.2
study group	33	あり	2	10.28
study group	33	あり	2	8.3
study group	33	あり	4	42.01
study group	33	なし	0	23.1
study group	33	なし	2	5.86
study group	33	あり	1	11.37
study group	33	あり	1	7.99
study group	33	なし	1	9.3
study group	33	あり	0	14.27
study group	33	なし	2	28.79
study group	33	なし	0	15
study group	33	あり	1	10.53
study group	33	あり	1	19.04
study group	33	あり	1	11.52
study group	33	あり	0	20.12
study group	33	あり	2	11.44
study group	33	あり	1	13.32
study group	33	あり	1	19.7
study group	33	なし	0	9.63
study group	33	あり	2	7.23
study group	33	あり	1	17.74
study group	33	あり	4	18.58
study group	33	なし	3	22.16
study group	33	なし	1	16.54
study group	33	あり	1	12.86
study group	33	あり	0	18.21
study group	33	あり	0	19.03
study group	33	あり	2	15.66
study group	33	あり	0	8.39
study group	33	あり	0	17.26
study group	33	あり	0	10.76
study group	33	なし	4	10.48
study group	33	あり	0	17.33
study group	33	あり	1	17.04
study group	33	あり	1	13.51
study group	33	なし	0	8.7
study group	33	なし	1	6.43
study group	33	あり	1	13.23
study group	33	あり	1	18.16
study group	33	なし	2	8.94
study group	33	あり	1	27.48
study group	33	あり	1	10.88
study group	33	あり	1	32.04
study group	33	なし	0	23.98
study group	33	あり	2	12.78
study group	33	なし	2	16.35
study group	33	あり	1	10.86
study group	33	あり	0	13.8
study group	33	あり	1	15.72
study group	33	なし	0	8.63
study group	33	なし	1	19.57
study group	33	あり	2	17.25
study group	33	あり	1	16.32
study group	33	あり	1	6.52
study group	33	あり	2	16.72
study group	33	あり	1	12.22
study group	33	あり	1	6.37
study group	33	あり	3	21.89
study group	33	あり	3	9.39
study group	33	あり	0	3.76
study group	33	あり	3	12.35
study group	33	あり	0	17.18
study group	33	あり	1	8.85
study group	33	あり	1	26.1
study group	33	あり	1	3.13
study group	33	あり	1	31.99
study group	33	なし	0	7.86
study group	33	あり	1	4.85
study group	33	あり	0	17.53
study group	33	あり	1	14.56
study group	33	あり	1	23.32
study group	33	あり	0	7.22
study group	33	あり	2	24.17
study group	33	なし	0	9.39
study group	33	あり	1	14.33
study group	33	あり	1	17.58
study group	33	あり	1	9.29
study group	33	なし	3	26.39
study group	33	あり	0	26.91
study group	33	あり	1	12.75
study group	33	あり	1	23.71
study group	33	あり	1	18.21
study group	33	あり	1	7.93
study group	33	あり	0	16.82
study group	33	あり	1	14.7
study group	33	あり	1	19.26
study group	33	あり	3	18.32
study group	33	なし	2	20.08
study group	34	あり	3	11.47
study group	34	あり	1	13.42
study group	34	あり	1	4.07
study group	34	あり	2	10.63
study group	34	あり	5	3.13
study group	34	あり	2	10.72
study group	34	あり	3	12.77
study group	34	あり	2	6.6
study group	34	あり	1	4.29
study group	34	あり	3	8.9
study group	34	あり	1	16.81
study group	34	あり	1	15.29
study group	34	あり	2	15.21
study group	34	あり	1	22.8
study group	34	あり	1	6.68
study group	34	あり	2	9.77
study group	34	あり	3	22.67
study group	34	あり	2	21.29
study group	34	あり	1	26.86
study group	34	あり	2	12.18
study group	34	あり	1	10.89
study group	34	あり	0	5.49
study group	34	あり	0	16.77
study group	34	あり	3	12.02
study group	34	あり	2	4.01
study group	34	あり	0	20.84
study group	34	あり	2	14.24
study group	34	なし	1	16.9
study group	34	あり	1	15.06
study group	34	あり	1	5.94
study group	34	あり	1	15.98
study group	34	あり	1	15.85
study group	34	あり	2	12.48
study group	34	あり	0	21.22
study group	34	あり	1	8.88
study group	34	なし	1	14.61
study group	34	あり	1	26.84
study group	34	あり	1	7.37
study group	34	あり	1	17.69
study group	34	あり	1	6.65
study group	34	あり	5	23.18
study group	34	あり	5	18.39
study group	34	あり	2	18.28
study group	34	なし	2	28.18
study group	34	あり	3	13.22
study group	34	あり	2	11.66
study group	34	あり	1	11.53
study group	34	あり	4	27.76
study group	34	あり	2	14.16
study group	34	なし	1	9.6
study group	34	あり	3	13.95
study group	34	あり	1	14.28
study group	34	あり	3	3.83
study group	34	なし	1	14.29
study group	34	あり	1	16.91
study group	34	あり	1	20.11
study group	34	なし	2	17.19
study group	34	あり	2	15.41
study group	34	あり	1	14.53
study group	34	あり	0	9.23
study group	34	あり	1	17.32
study group	34	あり	4	28.78
study group	34	あり	1	8.28
study group	34	あり	1	6.11
study group	34	なし	0	15.92
study group	34	あり	3	4.44
study group	34	あり	2	18.78
study group	34	あり	2	20.21
study group	34	あり	0	9.58
study group	34	なし	2	16.32
study group	34	あり	0	15.95
study group	34	なし	1	6.17
study group	34	あり	1	4.55
study group	34	あり	1	13.98
study group	34	あり	3	8.55
study group	34	あり	2	21.09
study group	34	あり	2	6.02
study group	34	あり	4	14.25
study group	34	あり	2	25.3
study group	34	あり	3	5.27
study group	34	あり	1	18.24
study group	34	あり	1	6.64
study group	34	あり	1	15.88
study group	34	あり	2	21.6
study group	34	あり	0	22.19
study group	34	あり	1	22.21
study group	34	あり	1	12.42
study group	34	あり	3	12.18
study group	34	あり	0	13.76
study group	34	あり	1	8.68
study group	34	なし	2	9.18
study group	34	あり	1	7.06
study group	34	あり	1	22.99
study group	34	なし	0	9
study group	34	あり	1	10.35
study group	34	あり	1	18.35
study group	34	あり	2	3.66
study group	34	あり	4	15.42
study group	34	あり	3	19.87
study group	34	なし	4	21.36
study group	34	あり	3	18.11
study group	34	あり	1	11.51
study group	34	なし	2	19.92
study group	34	あり	0	8.72
study group	34	あり	3	10.31
study group	34	あり	2	10.7
study group	34	あり	1	15.59
study group	34	あり	1	15.59
study group	34	なし	0	11.51
study group	34	あり	1	7.16
study group	34	なし	1	10.43
study group	34	あり	2	12.69
study group	34	あり	2	10.85
study group	34	あり	1	17.6
study group	34	なし	0	6.32
study group	34	あり	1	12.82
study group	34	あり	1	18.13
study group	34	なし	1	7.56
study group	34	あり	3	22.1
study group	34	あり	0	17.7
study group	34	あり	1	20.89
study group	34	なし	1	21.8
study group	34	あり	2	23.84
study group	34	あり	0	14.94
study group	34	あり	3	4.7
study group	34	あり	3	15.71
study group	34	なし	2	8.05
study group	34	あり	1	20.96
study group	34	あり	1	2.02
study group	34	あり	3	9.38
study group	34	あり	2	3.63
study group	34	あり	2	16.38
study group	34	あり	2	22.25
study group	34	あり	1	28.06
study group	34	あり	2	6.28
study group	34	あり	3	9.9
study group	34	なし	1	4.59
study group	34	あり	1	10.37
study group	34	なし	1	11.37
study group	34	あり	1	13.85
study group	34	あり	2	29.76
study group	34	あり	1	8.98
study group	34	あり	1	10.65
study group	34	あり	1	23.79
study group	34	なし	1	14.38
study group	34	あり	2	17.89
study group	34	なし	2	21.23
study group	34	あり	0	18.31
study group	34	あり	0	22.75
study group	34	あり	1	19.72
study group	34	なし	1	8.79
study group	34	あり	0	13.94
study group	34	なし	3	8.88
study group	34	あり	2	17.3
study group	34	あり	2	14.06
study group	34	なし	1	23.39
study group	34	なし	2	13.98
study group	35	あり	2	15.1
study group	35	あり	1	7.11
study group	35	あり	1	3.68
study group	35	あり	5	26
study group	35	あり	2	10.44
study group	35	なし	1	4.81
study group	35	あり	1	5.91
study group	35	あり	3	12.69
study group	35	あり	0	6.7
study group	35	なし	1	24.26
study group	35	あり	1	9
study group	35	なし	2	14.41
study group	35	あり	1	17.97
study group	35	あり	1	3.46
study group	35	あり	0	4.57
study group	35	あり	3	21.05
study group	35	あり	3	8.81
study group	35	なし	1	12.25
study group	35	あり	2	8.2
study group	35	あり	1	2.92
study group	35	あり	0	6.8
study group	35	あり	2	4.67
study group	35	あり	3	4.63
study group	35	あり	3	16.71
study group	35	あり	2	9.72
study group	35	あり	5	2.59
study group	35	あり	2	10.13
study group	35	あり	0	28.8
study group	35	あり	3	15.69
study group	35	あり	1	9.61
study group	35	あり	0	13.43
study group	35	あり	1	17.25
study group	35	あり	0	13.59
study group	35	あり	1	13.49
study group	35	あり	1	8.45
study group	35	あり	2	9.84
study group	35	なし	1	11.39
study group	35	あり	1	22.74
study group	35	なし	1	14.63
study group	35	あり	2	11.9
study group	35	なし	1	5.55
study group	35	あり	1	17.98
study group	35	あり	2	13.02
study group	35	あり	1	7
study group	35	あり	4	4.34
study group	35	あり	1	12.02
study group	35	なし	1	10.91
study group	35	あり	2	18.99
study group	35	あり	1	13.9
study group	35	あり	3	7.79
study group	35	あり	3	11.07
study group	35	あり	0	11.63
study group	35	あり	1	16.45
study group	35	あり	0	13.21
study group	35	あり	2	35.03
study group	35	なし	1	18.49
study group	35	あり	4	6.9
study group	35	なし	0	4.58
study group	35	あり	1	12.19
study group	35	なし	0	11.62
study group	35	あり	1	8.71
study group	35	なし	1	18.12
study group	35	あり	2	17.87
study group	35	あり	2	12.65
study group	35	なし	1	13.44
study group	35	あり	1	5.64
study group	35	あり	1	5.31
study group	35	あり	1	19.59
study group	35	あり	1	9.07
study group	35	あり	4	7.67
study group	35	なし	1	23.66
study group	35	あり	3	9.75
study group	35	あり	1	22.2
study group	35	あり	1	17.03
study group	35	あり	3	18.22
study group	35	あり	2	26.17
study group	35	あり	0	3.85
study group	35	なし	2	12.64
study group	35	あり	1	8.3
study group	35	あり	1	14.92
study group	35	あり	1	11.22
study group	35	あり	1	20.63
study group	35	あり	1	12.25
study group	35	あり	0	12.92
study group	35	なし	2	20.83
study group	35	あり	1	15.74
study group	35	あり	0	6.7
study group	35	あり	1	9.08
study group	35	なし	0	13.96
study group	35	あり	0	11.01
study group	35	なし	0	16.1
study group	35	あり	1	12.51
study group	35	あり	0	16.54
study group	35	あり	1	18.23
study group	35	あり	1	14.25
study group	35	あり	3	25.86
study group	35	なし	4	20.55
study group	35	あり	4	28.48
study group	35	あり	1	12.67
study group	35	なし	2	14.29
study group	35	なし	1	9.14
study group	35	あり	1	10.45
study group	35	あり	2	16.15
study group	35	あり	0	9.73
study group	35	あり	3	4.95
study group	35	あり	0	17.25
study group	35	あり	1	12.04
study group	35	なし	3	18.47
study group	35	あり	1	7.48
study group	35	あり	1	9.61
study group	35	あり	2	3.87
study group	35	なし	2	10.91
study group	35	あり	3	12.25
study group	35	あり	0	19.72
study group	35	なし	0	9.27
study group	35	なし	1	10.77
study group	35	あり	1	32.44
study group	35	なし	1	21.36
study group	35	あり	2	2.06
study group	35	なし	2	10.79
study group	35	あり	2	13.9
study group	35	あり	1	16.89
study group	35	あり	1	13.7
study group	35	なし	0	9.35
study group	35	なし	0	22.25
study group	35	あり	3	12.32
study group	35	あり	1	16.94
study group	35	なし	3	7.38
study group	35	あり	1	7.85
study group	35	あり	1	17.5
study group	35	あり	1	3.3
study group	35	あり	3	8.54
study group	35	あり	2	4.5
study group	35	あり	1	4.52
study group	35	あり	2	4.49
study group	35	あり	3	4.39
study group	35	あり	2	20.97
study group	35	あり	2	26.45
study group	35	なし	1	6.45
study group	35	なし	2	4.98
study group	35	あり	1	8.7
study group	35	なし	1	22.25
study group	35	あり	0	10.26
study group	35	あり	2	15.13
study group	35	あり	0	11.55
study group	35	あり	2	18.06
study group	35	あり	1	15.55
study group	35	あり	1	12.5
study group	35	あり	0	17.09
study group	35	あり	4	18.61
study group	35	あり	3	21.6
study group	35	あり	2	11.62
study group	35	あり	1	5.9
study group	35	あり	0	9.91
study group	35	あり	1	14.94
study group	35	あり	3	13.28
study group	35	あり	3	16.17
study group	35	あり	2	13.28
study group	36	あり	3	18.67
study group	36	あり	1	3.64
study group	36	あり	1	11.46
study group	36	あり	2	9.48
study group	36	あり	2	6.55
study group	36	あり	2	7.07
study group	36	あり	1	7.53
study group	36	あり	1	6.84
study group	36	なし	1	8.84
study group	36	なし	2	17.6
study group	36	あり	1	9.79
study group	36	あり	0	27.37
study group	36	あり	3	7.67
study group	36	あり	5	6.53
study group	36	あり	2	18.29
study group	36	あり	2	19
study group	36	あり	2	4.33
study group	36	あり	1	11.73
study group	36	あり	0	8.79
study group	36	あり	0	9.34
study group	36	あり	0	4.46
study group	36	あり	4	3.24
study group	36	あり	2	22.11
study group	36	なし	3	8.04
study group	36	あり	2	7.22
study group	36	あり	1	8.56
study group	36	あり	1	7.24
study group	36	あり	2	20.42
study group	36	なし	0	19.85
study group	36	あり	0	5.89
study group	36	あり	1	11.16
study group	36	なし	1	14.72
study group	36	あり	1	11.26
study group	36	あり	2	12.84
study group	36	あり	5	7.72
study group	36	あり	2	10.55
study group	36	あり	1	22.18
study group	36	あり	0	4.83
study group	36	なし	2	4.38
study group	36	あり	2	11.54
study group	36	あり	2	11.09
study group	36	あり	2	23.74
study group	36	なし	2	9.61
study group	36	あり	3	7.86
study group	36	あり	2	3.15
study group	36	なし	0	6.1
study group	36	あり	1	12.46
study group	36	なし	2	19.3
study group	36	なし	2	8.73
study group	36	あり	1	11.6
study group	36	あり	1	14.38
study group	36	あり	0	10.57
study group	36	あり	1	22.3
study group	36	あり	2	18.98
study group	36	あり	2	13.2
study group	36	あり	4	15.01
study group	36	あり	3	7.97
study group	36	あり	2	19.37
study group	36	あり	1	11.44
study group	36	なし	3	16.2
study group	36	あり	1	6.58
study group	36	なし	1	15.24
study group	36	あり	4	11.27
study group	36	あり	1	10.1
study group	36	あり	3	7.48
study group	36	あり	1	4.07
study group	36	あり	4	7.23
study group	36	あり	3	17.48
study group	36	あり	0	20.62
study group	36	なし	3	5.33
study group	36	あり	1	7.31
study group	36	あり	1	4.1
study group	36	あり	0	15.06
study group	36	あり	2	14.58
study group	36	あり	0	12.23
study group	36	あり	2	18.48
study group	36	あり	0	14.83
study group	36	あり	1	5.24
study group	36	あり	1	19.45
study group	36	なし	0	11.5
study group	36	あり	3	11.35
study group	36	あり	1	13.9
study group	36	あり	1	13.77
study group	36	あり	2	2.28
study group	36	あり	3	13.36
study group	36	なし	3	19.39
study group	36	あり	1	23.44
study group	36	あり	2	21.98
study group	36	あり	2	6.76
study group	36	なし	1	8.02
study group	36	あり	1	11.48
study group	36	あり	2	3.63
study group	36	なし	4	8.04
study group	36	あり	0	7.35
study group	36	あり	4	13.15
study group	36	あり	0	9.29
study group	36	あり	2	10.23
study group	36	なし	2	10.06
study group	36	あり	1	14.73
study group	36	あり	2	8.22
study group	36	あり	2	4.99
study group	36	あり	3	7.93
study group	36	あり	1	7.54
study group	36	あり	1	16.94
study group	36	あり	0	2.37
study group	36	あり	0	22.13
study group	36	あり	2	24.61
study group	36	あり	1	5.85
study group	36	あり	3	3.84
study group	36	あり	2	13.36
study group	36	あり	1	16.06
study group	36	あり	1	2.84
study group	36	あり	1	3.29
study group	36	あり	3	16.16
study group	36	なし	1	9.71
study group	36	あり	1	8.59
study group	36	あり	3	16.02
study group	36	あり	2	5.09
study group	36	なし	2	7.01
study group	36	あり	2	2.63
study group	36	あり	4	19.86
study group	36	なし	3	19.82
study group	36	あり	1	20.5
study group	36	なし	1	7.66
study group	36	あり	1	17.18
study group	36	なし	1	11.68
study group	36	なし	0	20.01
study group	36	あり	1	15.04
study group	36	あり	2	14.47
study group	36	なし	0	13.49
study group	36	あり	1	19.64
study group	36	あり	2	17.94
study group	36	あり	1	22.56
study group	36	あり	1	8.46
study group	36	あり	1	10.79
study group	36	あり	2	3.18
study group	36	あり	2	12.53
study group	36	あり	2	15.83
study group	36	あり	3	12.43
study group	37	あり	1	6.87
study group	37	あり	1	26.82
study group	37	あり	2	9.31
study group	37	あり	0	3.78
study group	37	あり	2	4.17
study group	37	あり	1	5.94
study group	37	あり	1	7.46
study group	37	あり	2	24.41
study group	37	あり	0	11
study group	37	あり	1	6.04
study group	37	あり	0	9.48
study group	37	あり	3	7.77
study group	37	あり	2	20.6
study group	37	あり	3	18.07
study group	37	あり	3	5.71
study group	37	あり	0	4.02
study group	37	あり	1	9.76
study group	37	あり	1	5.17
study group	37	あり	2	5.83
study group	37	あり	2	6.95
study group	37	あり	1	4.68
study group	37	あり	2	16.86
study group	37	あり	1	26.17
study group	37	なし	0	9.83
study group	37	あり	1	10.78
study group	37	あり	2	16.2
study group	37	あり	4	8.82
study group	37	あり	4	10.9
study group	37	なし	1	10.43
study group	37	あり	1	6.14
study group	37	あり	3	6.29
study group	37	あり	1	9.6
study group	37	あり	4	19.1
study group	37	あり	3	10.94
study group	37	なし	2	9.08
study group	37	あり	2	17.43
study group	37	あり	2	5.61
study group	37	あり	1	6.07
study group	37	なし	2	4.47
study group	37	あり	2	16.13
study group	37	なし	4	16.17
study group	37	あり	3	8.79
study group	37	あり	1	9.51
study group	37	なし	0	17.71
study group	37	あり	3	11.41
study group	37	あり	1	7.2
study group	37	あり	1	3
study group	37	あり	3	18.91
study group	37	あり	2	16.08
study group	37	あり	2	9.1
study group	37	あり	1	2.51
study group	37	なし	2	20.45
study group	37	あり	1	8.73
study group	37	あり	1	8.1
study group	37	あり	1	2.49
study group	37	あり	4	6.24
study group	37	あり	1	7.54
study group	37	あり	4	6.06
study group	37	なし	1	3.13
study group	37	あり	2	22.97
study group	37	あり	4	9.51
study group	37	あり	1	15.58
study group	37	あり	0	4.7
study group	37	なし	1	14.84
study group	37	あり	1	13.74
study group	37	あり	2	11.46
study group	37	あり	1	14.73
study group	37	あり	4	18.58
study group	37	あり	0	6.58
study group	37	あり	0	21.88
study group	37	なし	3	17.36
study group	37	あり	2	15.67
study group	37	あり	1	25.38
study group	37	なし	3	6.63
study group	37	なし	2	9.53
study group	37	なし	2	2.18
study group	37	あり	4	23.73
study group	37	なし	0	9.68
study group	37	あり	1	6.02
study group	37	あり	1	9.27
study group	37	なし	3	11.03
study group	37	なし	0	8.61
study group	37	あり	1	8.39
study group	37	なし	1	3.36
study group	37	あり	4	10.27
study group	37	あり	1	7.2
study group	37	あり	1	11.27
study group	37	なし	0	15.68
study group	37	あり	1	1.24
study group	37	あり	2	9.38
study group	37	あり	1	13
study group	37	なし	1	4.4
study group	37	あり	1	17.31
study group	37	あり	1	6.62
study group	37	なし	1	10.8
study group	37	あり	1	12.33
study group	37	あり	1	3.18
study group	37	あり	3	4.79
study group	37	あり	1	12.09
study group	37	なし	1	1.44
study group	37	あり	2	16.61
study group	37	あり	1	19.59
study group	37	あり	1	7
study group	37	なし	1	4.65
study group	37	あり	0	17.32
study group	37	なし	3	21.7
study group	37	なし	1	15.83
study group	37	なし	1	18.05
study group	37	あり	1	14.13
study group	37	あり	1	6.93
study group	37	あり	2	21.75
study group	37	あり	1	6.67
study group	37	あり	1	13.47
study group	37	なし	1	13.51
study group	37	あり	2	13.31
study group	37	あり	1	26.92
study group	37	あり	1	15.43
study group	37	あり	1	3.7
study group	37	あり	2	12.48
study group	37	あり	1	21.36
study group	37	あり	2	13.41
study group	37	あり	3	11.43
study group	38	あり	5	20.6
study group	38	あり	1	13.52
study group	38	あり	0	2.85
study group	38	あり	1	12.45
study group	38	あり	2	9.31
study group	38	あり	0	9.23
study group	38	あり	2	13.94
study group	38	あり	2	17.51
study group	38	あり	1	10.65
study group	38	あり	3	5.19
study group	38	あり	2	10.15
study group	38	なし	0	6.65
study group	38	あり	1	6.56
study group	38	あり	3	8.14
study group	38	あり	2	9.07
study group	38	あり	2	15.28
study group	38	あり	2	22.51
study group	38	あり	0	11.62
study group	38	あり	3	8.6
study group	38	なし	5	18.82
study group	38	あり	2	4.31
study group	38	なし	0	7.37
study group	38	あり	2	16.3
study group	38	あり	2	6.25
study group	38	なし	1	15.31
study group	38	あり	2	18.53
study group	38	あり	1	7.71
study group	38	あり	2	11.35
study group	38	あり	1	9.13
study group	38	あり	0	1.48
study group	38	なし	5	10.88
study group	38	あり	4	4.11
study group	38	あり	1	10.4
study group	38	あり	0	13.52
study group	38	なし	1	9.58
study group	38	あり	3	11
study group	38	あり	0	10.89
study group	38	なし	1	2.06
study group	38	なし	0	10.34
study group	38	あり	2	13.66
study group	38	あり	1	7.32
study group	38	あり	2	16.16
study group	38	あり	1	4.32
study group	38	あり	4	7.75
study group	38	あり	3	13.6
study group	38	あり	1	2.47
study group	38	あり	2	5.87
study group	38	あり	1	9.92
study group	38	あり	1	6.73
study group	38	あり	1	14.43
study group	38	あり	1	11.87
study group	38	あり	1	4.26
study group	38	あり	3	7.86
study group	38	あり	1	13.9
study group	38	あり	0	8.3
study group	38	なし	2	10.4
study group	38	なし	2	10.67
study group	38	なし	1	8.4
study group	38	あり	2	9.45
study group	38	あり	0	7.81
study group	38	あり	0	6.92
study group	38	なし	5	9.72
study group	38	あり	1	14.32
study group	38	あり	2	6.4
study group	38	あり	2	4.18
study group	38	あり	1	20.97
study group	38	あり	0	14.71
study group	38	あり	1	11.46
study group	38	あり	1	13.29
study group	38	なし	3	1.22
study group	38	あり	2	8.11
study group	38	あり	1	4.48
study group	38	あり	2	8.81
study group	38	あり	2	4.48
study group	38	あり	1	6.92
study group	38	なし	1	3.13
study group	38	なし	0	4.12
study group	38	なし	0	16.82
study group	38	あり	2	24.28
study group	38	あり	1	10.48
study group	38	なし	1	7.3
study group	38	あり	1	11.01
study group	38	あり	0	6.87
study group	38	あり	1	9.45
study group	38	あり	1	11.16
study group	38	あり	2	15.21
study group	38	あり	1	7.49
study group	38	なし	2	1.69
study group	38	あり	0	8.61
study group	38	あり	1	29.73
study group	38	あり	2	12.22
study group	39	あり	1	4.54
study group	39	あり	2	12.89
study group	39	あり	1	4.88
study group	39	あり	0	17.33
study group	39	あり	2	14.01
study group	39	なし	0	7.53
study group	39	あり	0	5.05
study group	39	あり	3	10.6
study group	39	あり	2	11.66
study group	39	なし	2	7.76
study group	39	あり	1	12.63
study group	39	あり	1	4.51
study group	39	あり	3	13.2
study group	39	あり	5	5.87
study group	39	あり	2	13.5
study group	39	なし	1	2.12
study group	39	あり	0	8.51
study group	39	なし	3	11.98
study group	39	なし	1	5.79
study group	39	なし	1	6.33
study group	39	あり	1	6.39
study group	39	なし	1	1.96
study group	39	あり	2	2.75
study group	39	あり	3	2.53
study group	39	あり	3	8.44
study group	39	あり	1	9.86
study group	39	あり	0	3.41
study group	39	あり	1	11.49
study group	39	なし	1	1.82
study group	39	あり	3	15.93
study group	39	あり	1	13.03
study group	39	あり	5	11.87
study group	39	あり	1	5.09
study group	39	あり	0	9.86
study group	39	あり	3	7.23
study group	39	あり	2	7.17
study group	39	あり	0	6.15
study group	39	あり	2	4.11
study group	39	あり	3	15.32
study group	39	あり	2	5.2
study group	39	あり	1	4.09
study group	39	なし	1	5.86
study group	39	あり	2	3.45
study group	39	あり	1	11.81
study group	39	あり	1	10.43
study group	39	あり	0	6.53
study group	39	あり	2	10.48
study group	39	なし	1	16.15
study group	39	あり	1	2.79
study group	39	あり	2	9.55
study group	39	なし	1	8.09
study group	39	あり	1	8.98
control group	28	なし	4	19.78
control group	28	なし	0	19.27
control group	28	なし	1	15.51
control group	28	なし	1	16.9
control group	28	なし	1	21.89
control group	28	なし	0	18.53
control group	28	なし	2	24.29
control group	28	なし	1	13.85
control group	28	なし	2	9.89
control group	28	なし	3	12.03
control group	28	なし	2	16.16
control group	28	なし	2	14.65
control group	28	なし	1	30.71
control group	28	なし	0	15.71
control group	28	なし	4	27.29
control group	28	なし	1	24.34
control group	28	なし	1	17.75
control group	28	なし	1	11.98
control group	28	なし	3	5.64
control group	28	なし	1	33.62
control group	28	なし	3	14.83
control group	28	なし	3	24.93
control group	28	なし	2	43.83
control group	28	なし	2	17
control group	28	なし	1	13.65
control group	28	なし	2	22.24
control group	28	なし	3	21.61
control group	29	なし	1	11.93
control group	29	なし	0	24.33
control group	29	なし	0	9.35
control group	29	なし	1	12.76
control group	29	なし	0	29.07
control group	29	なし	1	16.17
control group	29	なし	1	11.41
control group	29	なし	0	18.14
control group	29	なし	2	29.81
control group	29	なし	2	2.96
control group	29	なし	1	17.81
control group	29	なし	1	15.03
control group	29	なし	2	6.69
control group	29	なし	2	12.8
control group	29	なし	0	9.5
control group	29	なし	1	26.7
control group	29	なし	1	23.57
control group	29	なし	0	16.19
control group	29	なし	0	20.93
control group	29	なし	2	17.58
control group	29	なし	1	17.23
control group	29	なし	2	28.64
control group	29	なし	4	14.72
control group	29	なし	1	8.1
control group	29	なし	1	21.03
control group	29	なし	0	28.26
control group	29	なし	0	14.3
control group	29	なし	1	14.75
control group	29	なし	4	19.47
control group	29	なし	2	15.89
control group	29	なし	1	10.51
control group	29	なし	1	29.46
control group	29	なし	3	17.37
control group	29	なし	0	34.93
control group	29	なし	1	41.55
control group	29	なし	1	13.1
control group	29	なし	1	22.88
control group	29	なし	1	19.32
control group	29	なし	1	28.89
control group	29	なし	3	20.5
control group	29	なし	2	10.25
control group	30	なし	0	26.7
control group	30	なし	0	15.59
control group	30	なし	0	18.88
control group	30	なし	1	18.92
control group	30	なし	3	19.11
control group	30	なし	0	15.65
control group	30	なし	0	17.87
control group	30	なし	2	11.49
control group	30	なし	0	23.25
control group	30	なし	0	11.95
control group	30	なし	0	22.73
control group	30	なし	4	22.02
control group	30	なし	1	13.92
control group	30	なし	1	28.88
control group	30	なし	3	11.72
control group	30	なし	2	15.74
control group	30	なし	1	18.96
control group	30	なし	2	12.28
control group	30	なし	1	32.63
control group	30	なし	1	7.41
control group	30	なし	2	28.42
control group	30	なし	2	9.91
control group	30	なし	1	4.6
control group	30	なし	0	30.73
control group	30	なし	0	26.42
control group	30	なし	0	15.06
control group	30	なし	1	31.08
control group	30	なし	0	20.21
control group	30	なし	1	9.7
control group	30	なし	0	22.98
control group	30	なし	2	23.76
control group	30	なし	0	11.04
control group	30	なし	2	8.03
control group	30	なし	2	20.29
control group	30	なし	1	19.05
control group	30	なし	0	21.29
control group	30	なし	1	6.24
control group	30	なし	1	10.39
control group	30	なし	1	32.68
control group	30	なし	2	14.82
control group	30	なし	2	13.48
control group	30	なし	1	24.45
control group	30	なし	1	14.11
control group	30	なし	2	27.87
control group	31	なし	1	17.96
control group	31	なし	1	8.53
control group	31	なし	2	11.59
control group	31	なし	1	25.69
control group	31	なし	2	16.14
control group	31	なし	1	22.72
control group	31	なし	3	28.12
control group	31	なし	2	3.14
control group	31	なし	2	11.73
control group	31	なし	0	11.23
control group	31	なし	2	10.13
control group	31	なし	3	21.94
control group	31	なし	2	15.14
control group	31	なし	2	9.27
control group	31	なし	2	21.11
control group	31	なし	1	5.55
control group	31	なし	3	19.35
control group	31	なし	2	27.78
control group	31	なし	0	25.21
control group	31	なし	1	11.83
control group	31	なし	1	6.65
control group	31	なし	1	19.43
control group	31	なし	2	21.23
control group	31	なし	0	27.85
control group	31	なし	1	39.52
control group	31	なし	2	5.12
control group	31	なし	1	21.54
control group	31	なし	2	8.09
control group	31	なし	2	27.32
control group	31	なし	2	23.47
control group	31	なし	1	10.48
control group	31	なし	0	34.91
control group	31	なし	1	27.91
control group	31	なし	1	10.29
control group	31	なし	2	10.23
control group	31	なし	1	29.85
control group	31	なし	1	20.45
control group	31	なし	2	20.61
control group	31	なし	2	15.47
control group	31	なし	3	25.4
control group	32	なし	3	25.84
control group	32	なし	0	19.79
control group	32	なし	0	13.6
control group	32	なし	0	19.84
control group	32	なし	1	10.01
control group	32	なし	1	10.82
control group	32	なし	1	25.86
control group	32	なし	1	25.99
control group	32	なし	0	14.19
control group	32	なし	3	15.29
control group	32	なし	2	29.51
control group	32	なし	2	16.17
control group	32	なし	0	5.15
control group	32	なし	0	15.11
control group	32	なし	2	19.55
control group	32	なし	1	7.42
control group	32	なし	2	19.75
control group	32	なし	1	8
control group	32	なし	0	7.3
control group	32	なし	2	7.2
control group	32	なし	1	16.91
control group	32	なし	2	19.92
control group	32	なし	0	24.8
control group	32	なし	2	10.8
control group	32	なし	0	24.52
control group	32	なし	0	27.01
control group	32	なし	1	8.83
control group	32	なし	2	16.4
control group	32	なし	4	21.91
control group	32	なし	1	26.2
control group	32	なし	2	19.23
control group	32	なし	1	14.87
control group	32	なし	1	27.46
control group	32	なし	2	25.6
control group	32	なし	1	6.56
control group	32	なし	2	8.83
control group	32	なし	3	21.25
control group	32	なし	3	15.16
control group	32	なし	1	14.2
control group	32	なし	0	26.63
control group	32	なし	1	30.87
control group	32	なし	1	23.93
control group	32	なし	3	18.54
control group	32	なし	3	20.32
control group	32	なし	0	22.15
control group	32	なし	1	5.67
control group	33	なし	2	17.7
control group	33	なし	1	14.83
control group	33	なし	0	18.47
control group	33	なし	0	11.03
control group	33	なし	2	17.86
control group	33	なし	3	10.11
control group	33	なし	1	20.23
control group	33	なし	1	22.57
control group	33	なし	1	22.12
control group	33	なし	1	6.81
control group	33	なし	0	16.16
control group	33	なし	2	32.51
control group	33	なし	2	13.97
control group	33	なし	2	27.5
control group	33	なし	3	16.7
control group	33	なし	3	10.12
control group	33	なし	1	7.04
control group	33	なし	3	18.24
control group	33	なし	1	7.29
control group	33	なし	0	19.23
control group	33	なし	1	6.78
control group	33	なし	3	8.8
control group	33	なし	1	17.76
control group	33	なし	2	8.91
control group	33	なし	0	19.07
control group	33	なし	2	11.55
control group	33	なし	2	13
control group	33	なし	1	6.4
control group	33	なし	1	18.29
control group	33	なし	1	30.59
control group	33	なし	1	13.66
control group	33	なし	1	21.41
control group	33	なし	1	11.83
control group	33	なし	3	16.11
control group	33	なし	1	13.2
control group	33	なし	3	26.87
control group	33	なし	3	15.05
control group	33	なし	1	21.45
control group	33	なし	1	12.66
control group	33	なし	4	20.04
control group	33	なし	1	9.35
control group	33	なし	3	16.67
control group	33	なし	1	13.29
control group	33	なし	0	22.01
control group	33	なし	0	23.23
control group	33	なし	1	8.45
control group	33	なし	1	15.93
control group	33	なし	1	7.39
control group	33	なし	2	12.2
control group	33	なし	2	15.89
control group	34	なし	1	25.93
control group	34	なし	0	22.11
control group	34	なし	1	10.78
control group	34	なし	2	22.41
control group	34	なし	0	8.67
control group	34	なし	1	20.36
control group	34	なし	1	8.26
control group	34	なし	0	10.04
control group	34	なし	1	23.28
control group	34	なし	0	15.43
control group	34	なし	2	7.49
control group	34	なし	2	15.69
control group	34	なし	1	26.12
control group	34	なし	2	9.55
control group	34	なし	1	11.36
control group	34	なし	3	18.92
control group	34	なし	1	11.73
control group	34	なし	1	10.15
control group	34	なし	1	11.05
control group	34	なし	2	9.65
control group	34	なし	4	25.03
control group	34	なし	2	7.08
control group	34	なし	2	18.78
control group	34	なし	0	4.45
control group	34	なし	4	6.04
control group	34	なし	1	14.32
control group	34	なし	4	18
control group	34	なし	0	26.02
control group	34	なし	2	12.72
control group	34	なし	2	6.38
control group	34	なし	0	17.83
control group	34	なし	0	13.87
control group	34	なし	1	11.43
control group	34	なし	2	19.28
control group	34	なし	3	17.01
control group	34	なし	1	36
control group	34	なし	2	12.33
control group	34	なし	4	23.03
control group	34	なし	1	11.85
control group	34	なし	2	19.63
control group	34	なし	1	12.91
control group	34	なし	1	25.72
control group	34	なし	1	17.7
control group	34	なし	1	20.02
control group	34	なし	2	14.65
control group	34	なし	1	4.93
control group	35	なし	2	4.46
control group	35	なし	2	6.87
control group	35	なし	2	6.33
control group	35	なし	2	23.37
control group	35	なし	2	18.27
control group	35	なし	0	7.76
control group	35	なし	1	10.71
control group	35	なし	2	5.11
control group	35	なし	1	12.82
control group	35	なし	0	17.15
control group	35	なし	1	18.85
control group	35	なし	1	7.42
control group	35	なし	2	14.2
control group	35	なし	2	9.67
control group	35	なし	3	22.63
control group	35	なし	1	3.97
control group	35	なし	1	12.95
control group	35	なし	0	11.62
control group	35	なし	1	19.87
control group	35	なし	4	21.27
control group	35	なし	0	8.27
control group	35	なし	2	16.65
control group	35	なし	2	8.51
control group	35	なし	2	8.79
control group	35	なし	2	15.11
control group	35	なし	1	13.43
control group	35	なし	1	6.66
control group	35	なし	0	5.68
control group	35	なし	4	16.78
control group	35	なし	1	21.66
control group	35	なし	1	7.59
control group	35	なし	1	8.84
control group	35	なし	3	18.93
control group	35	なし	1	32.95
control group	35	なし	2	11.53
control group	35	なし	2	4.38
control group	35	なし	1	14.47
control group	35	なし	1	13.32
control group	35	なし	0	17.18
control group	35	なし	2	7.49
control group	35	なし	1	31.31
control group	35	なし	1	10.81
control group	35	なし	4	17.1
control group	35	なし	1	10.22
control group	35	なし	2	8.71
control group	35	なし	1	16.69
control group	35	なし	2	21.8
control group	35	なし	0	20.49
control group	35	なし	1	16.64
control group	35	なし	2	16.74
control group	35	なし	2	15.17
control group	36	なし	1	7.79
control group	36	なし	1	15.08
control group	36	なし	1	18.65
control group	36	なし	2	5.29
control group	36	なし	2	2.94
control group	36	なし	1	5.22
control group	36	なし	2	19.88
control group	36	なし	2	14.67
control group	36	なし	0	11.14
control group	36	なし	2	7.11
control group	36	なし	1	8.44
control group	36	なし	1	15.41
control group	36	なし	1	8.95
control group	36	なし	2	16.3
control group	36	なし	2	9.82
control group	36	なし	2	9.15
control group	36	なし	2	4.98
control group	36	なし	1	13.22
control group	36	なし	1	14.58
control group	36	なし	2	4.69
control group	36	なし	3	4.28
control group	36	なし	2	11.25
control group	36	なし	2	17.8
control group	36	なし	1	10.99
control group	36	なし	1	9.71
control group	36	なし	3	20.24
control group	36	なし	4	17.49
control group	36	なし	2	20.92
control group	36	なし	2	6.51
control group	36	なし	2	3.65
control group	36	なし	1	16.05
control group	36	なし	1	17.86
control group	36	なし	1	23.88
control group	36	なし	2	9.14
control group	36	なし	1	12.02
control group	36	なし	1	8.58
control group	36	なし	1	9.04
control group	36	なし	1	17.59
control group	36	なし	2	9.68
control group	36	なし	2	15.38
control group	36	なし	3	15.66
control group	36	なし	1	6.5
control group	36	なし	0	22.78
control group	36	なし	1	19.73
control group	36	なし	1	10.4
control group	36	なし	1	12.07
control group	36	なし	2	19.17
control group	36	なし	1	16.85
control group	36	なし	1	13.74
control group	37	なし	0	1.92
control group	37	なし	0	5.87
control group	37	なし	1	4.22
control group	37	なし	3	3.36
control group	37	なし	1	5.87
control group	37	なし	1	18.54
control group	37	なし	3	14.79
control group	37	なし	1	17.18
control group	37	なし	0	12.55
control group	37	なし	2	3.33
control group	37	なし	2	12.28
control group	37	なし	1	12.13
control group	37	なし	0	11.01
control group	37	なし	2	12.59
control group	37	なし	4	6.58
control group	37	なし	1	4.11
control group	37	なし	3	14.61
control group	37	なし	3	10.49
control group	37	なし	1	14.8
control group	37	なし	1	8.17
control group	37	なし	3	14.96
control group	37	なし	1	17.3
control group	37	なし	0	17.66
control group	37	なし	1	16.07
control group	37	なし	1	10.11
control group	37	なし	2	4.86
control group	37	なし	1	10.27
control group	37	なし	2	7.42
control group	37	なし	1	12.17
control group	37	なし	1	18.67
control group	37	なし	2	17.19
control group	37	なし	1	11.96
control group	37	なし	0	7.11
control group	37	なし	1	27.59
control group	37	なし	1	18.45
control group	37	なし	1	13.64
control group	37	なし	0	18.64
control group	38	なし	1	6.59
control group	38	なし	1	2.73
control group	38	なし	1	16.79
control group	38	なし	2	13.16
control group	38	なし	1	3.66
control group	38	なし	0	8.74
control group	38	なし	0	12.03
control group	38	なし	4	17.1
control group	38	なし	1	8.06
control group	38	なし	1	3.46
control group	38	なし	3	5.23
control group	38	なし	3	3.57
control group	38	なし	2	10.88
control group	38	なし	1	4.31
[truncated: 31 more rows]
